# Supplementary material for: mRNA Profiling Reveals Determinants of Trastuzumab Efficiency in HER2-Positive Breast Cancer
Source: PubMed Central journal article supplement (PMC4339844; doi:10.1371/journal.pone.0117818), 2015-02-24

# ALPP

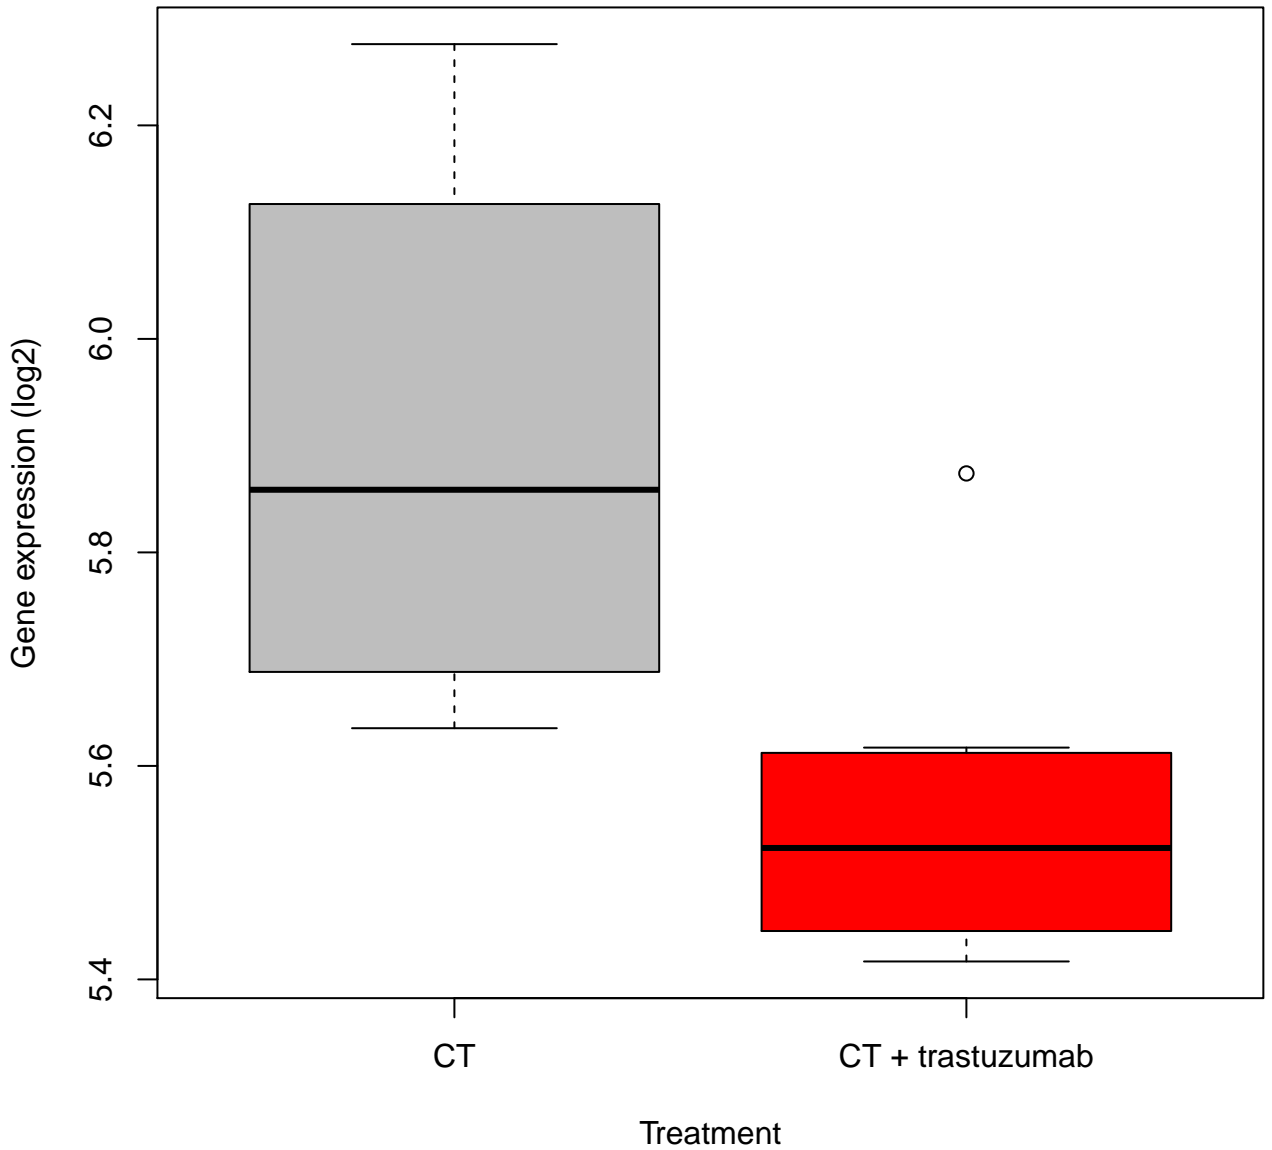

# CALCOCO1

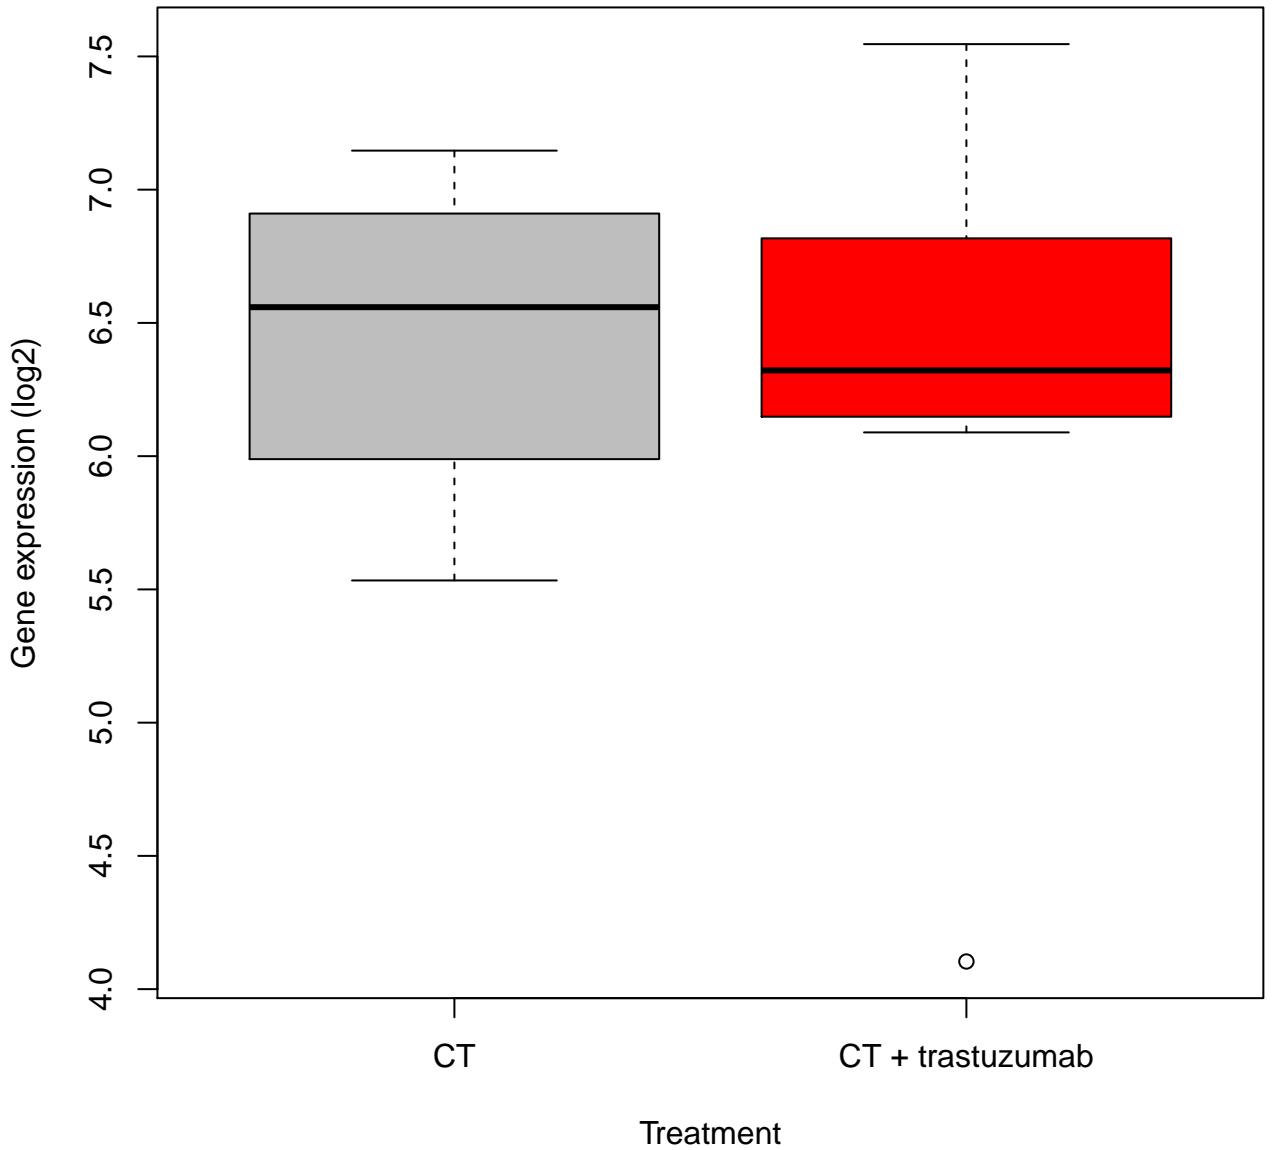

# CAV1

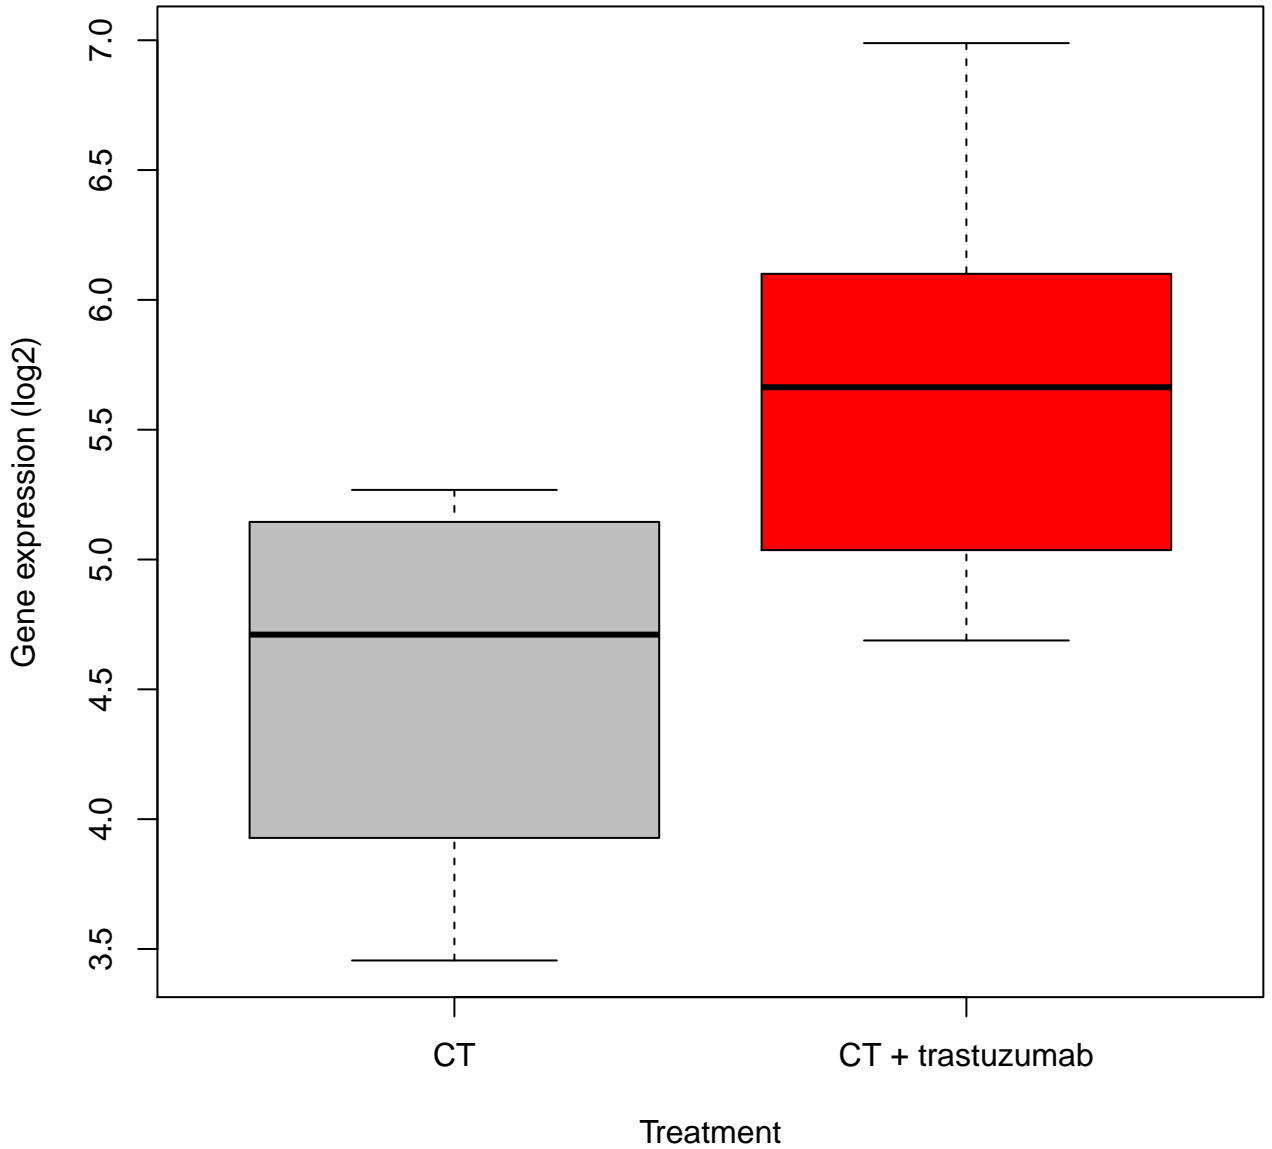

# CXCR7

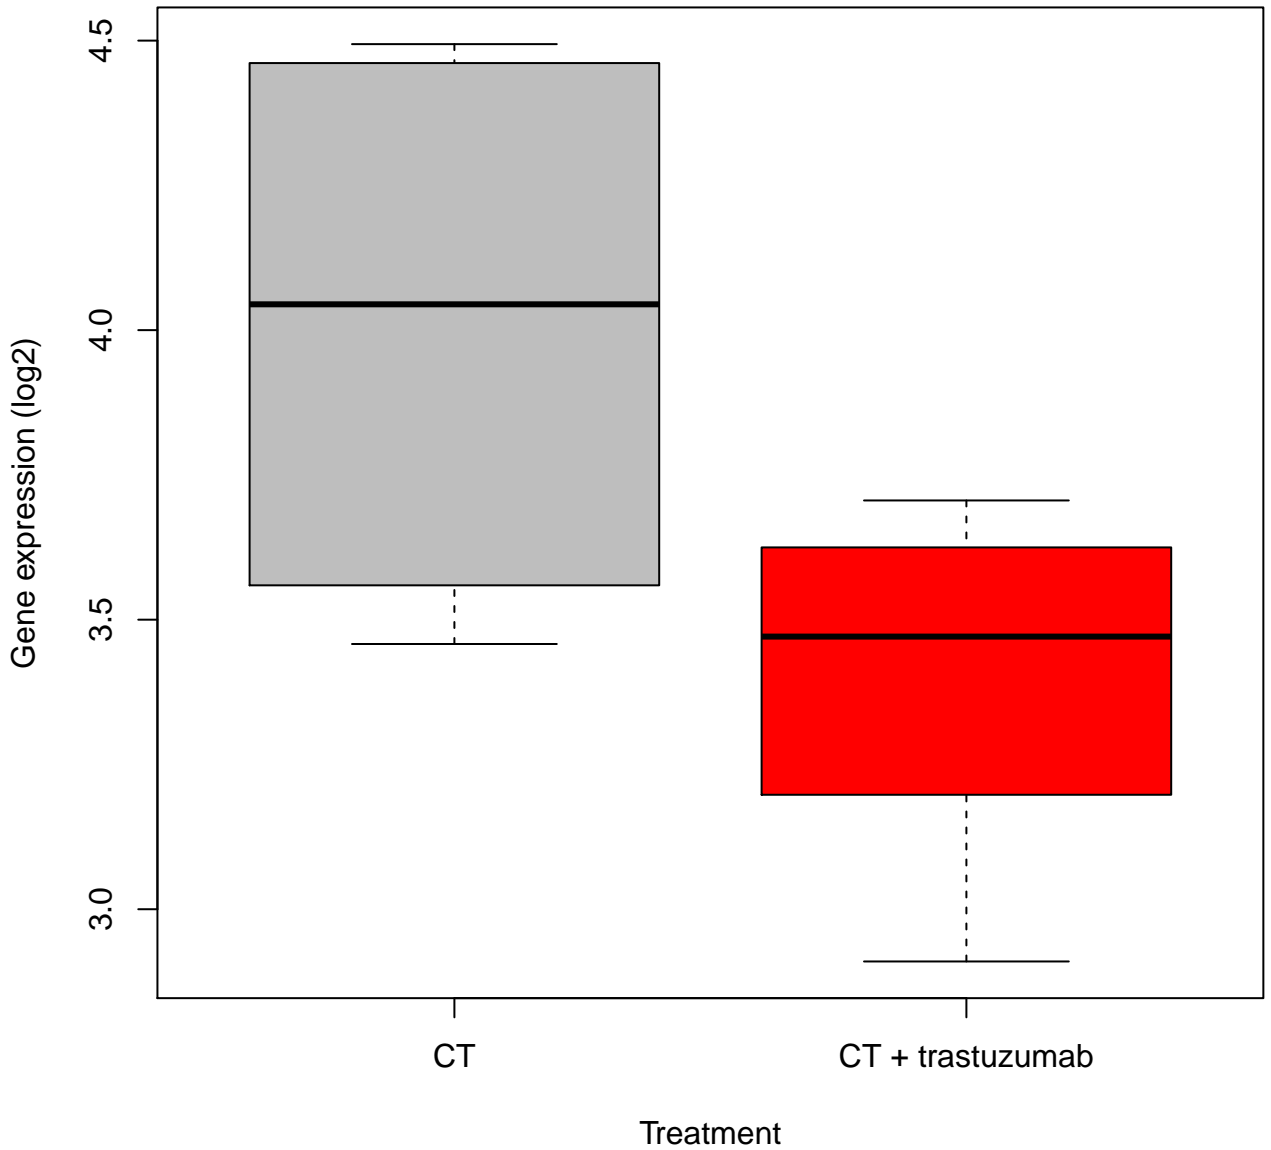

# CYP1A2

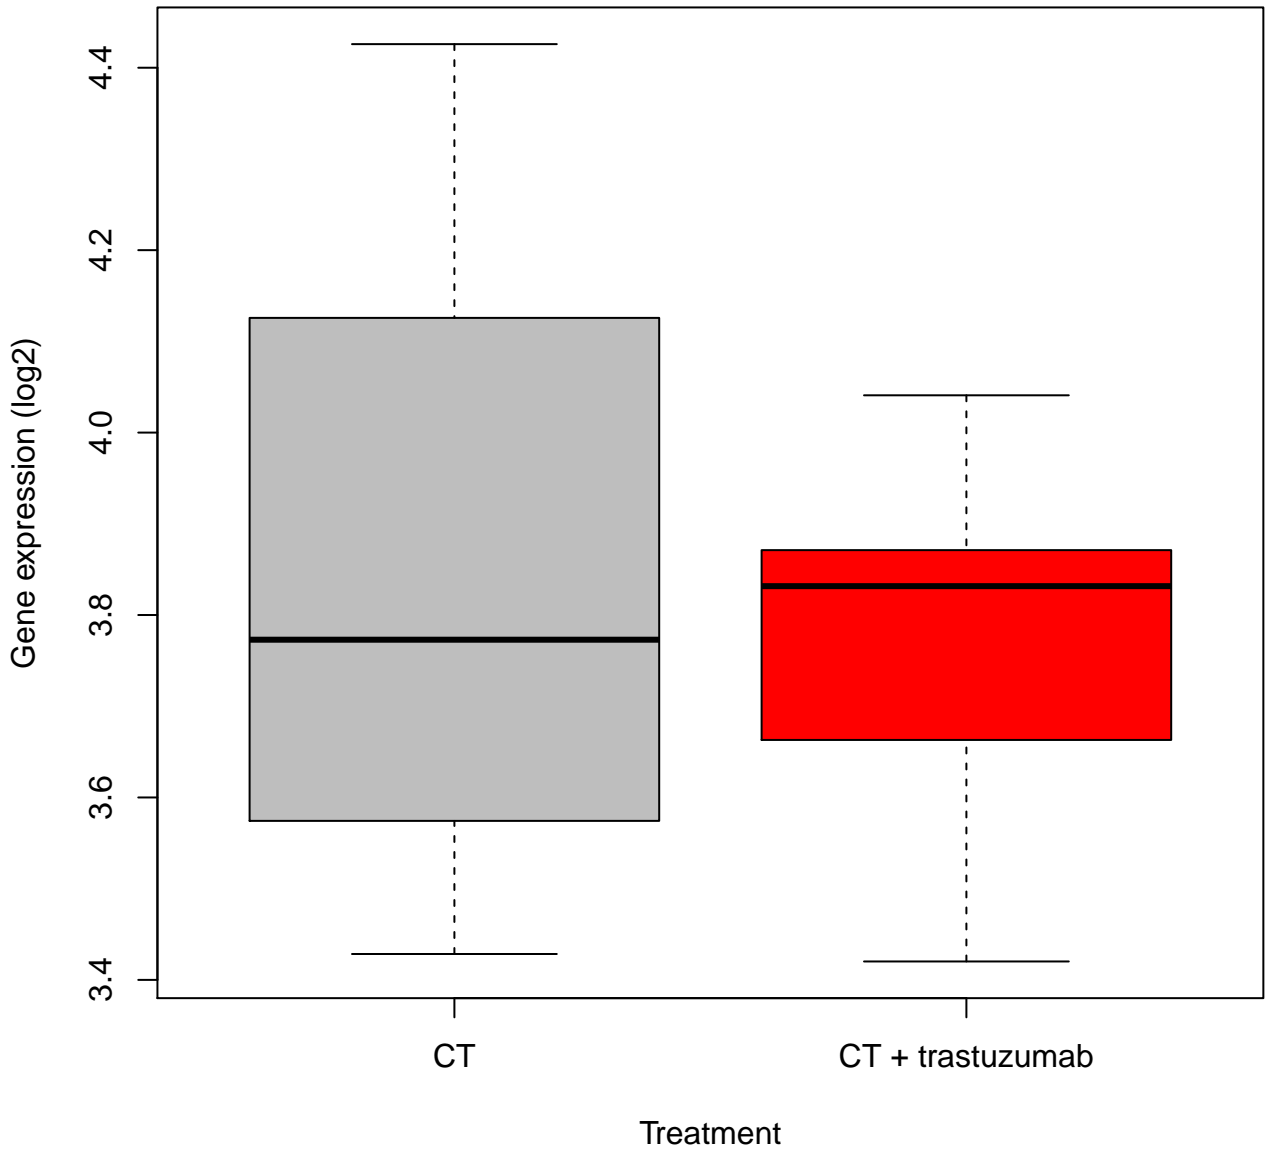

# FAM84A

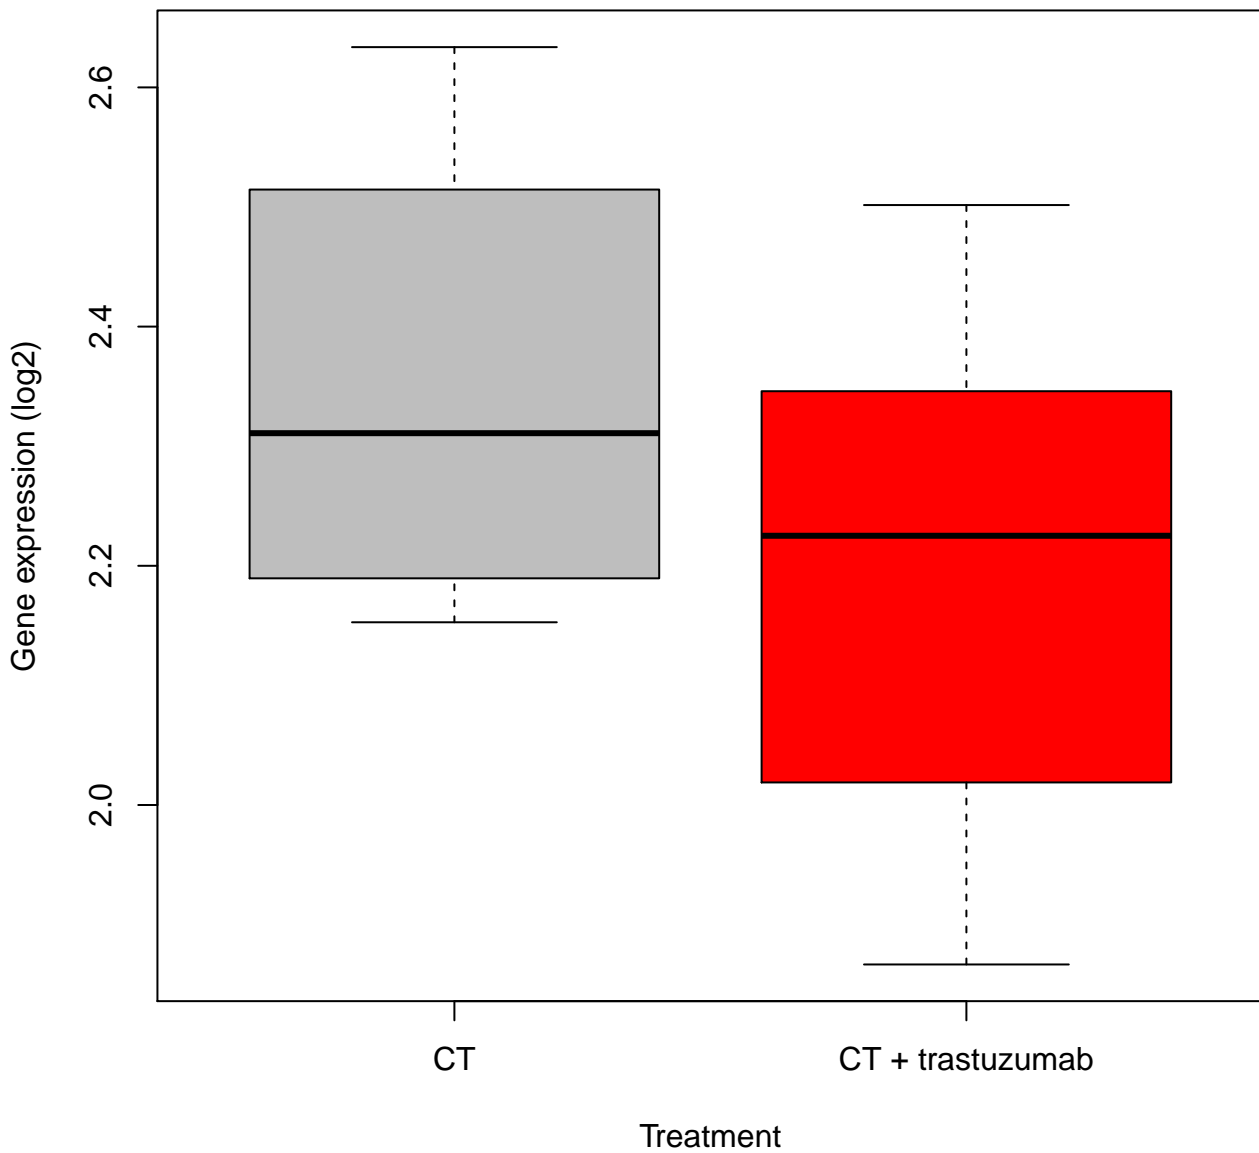

# IGFBP3

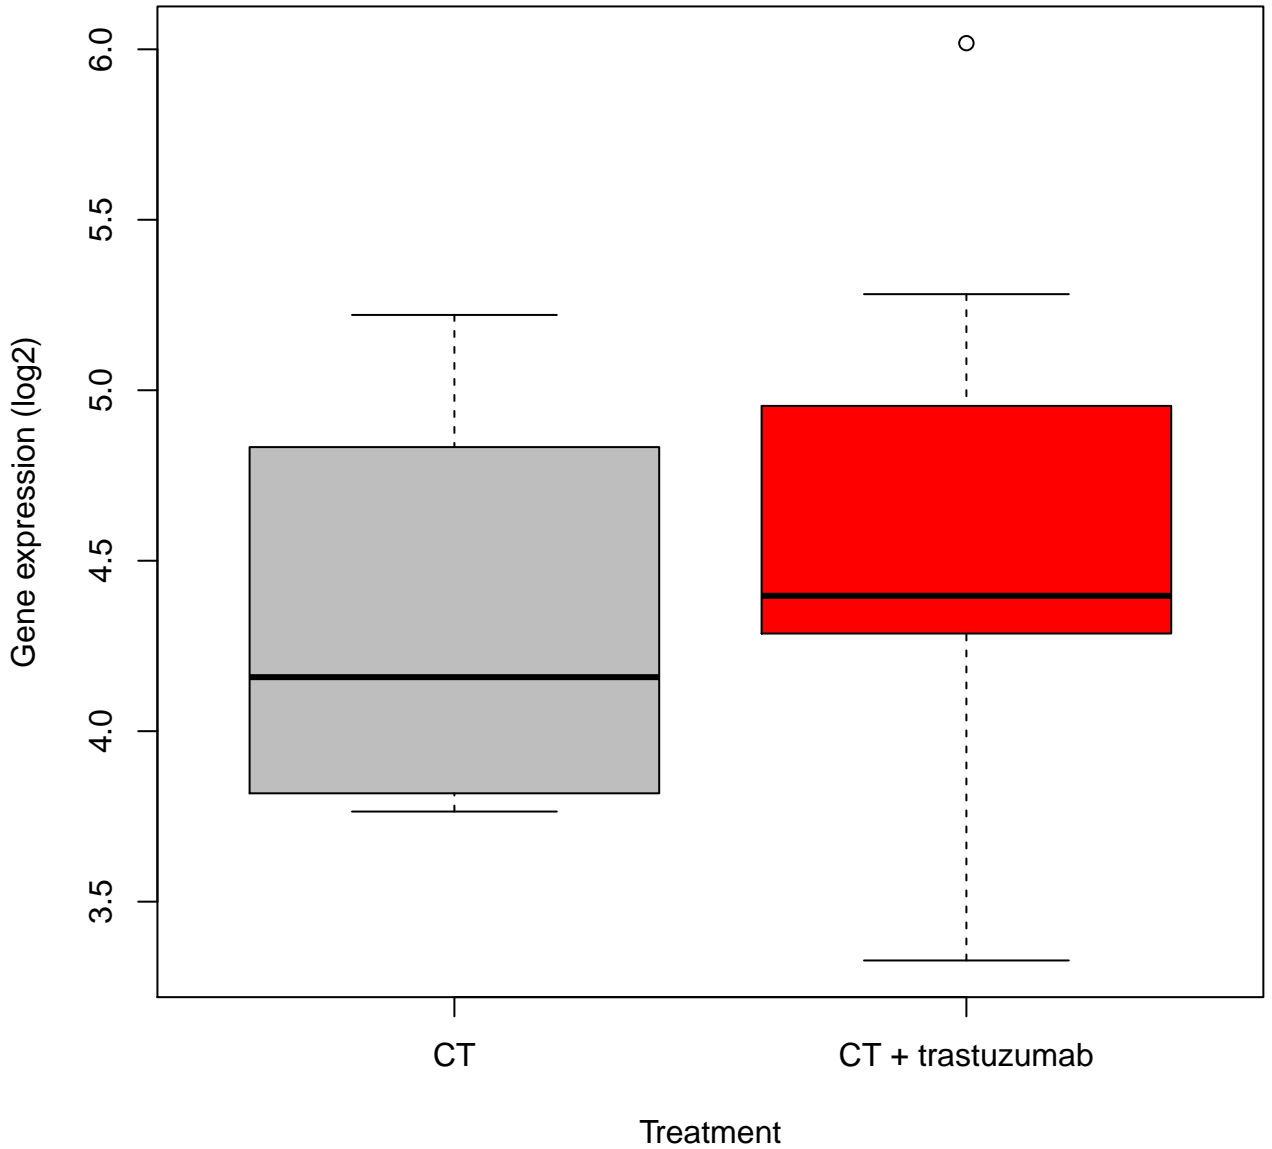

# L1CAM

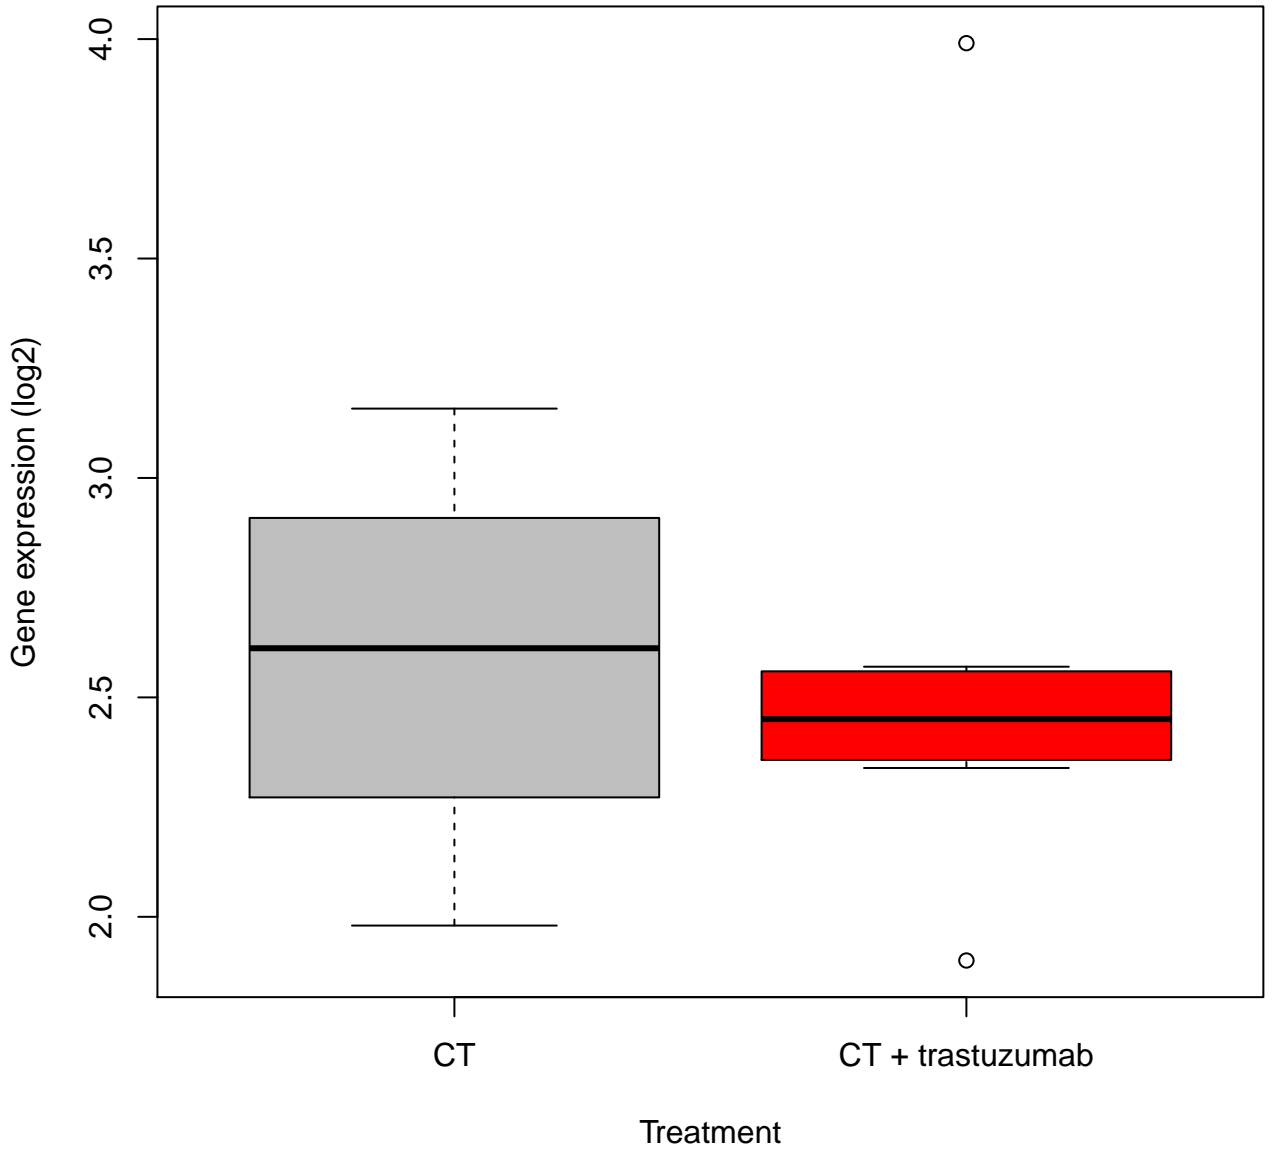



# MALAT1

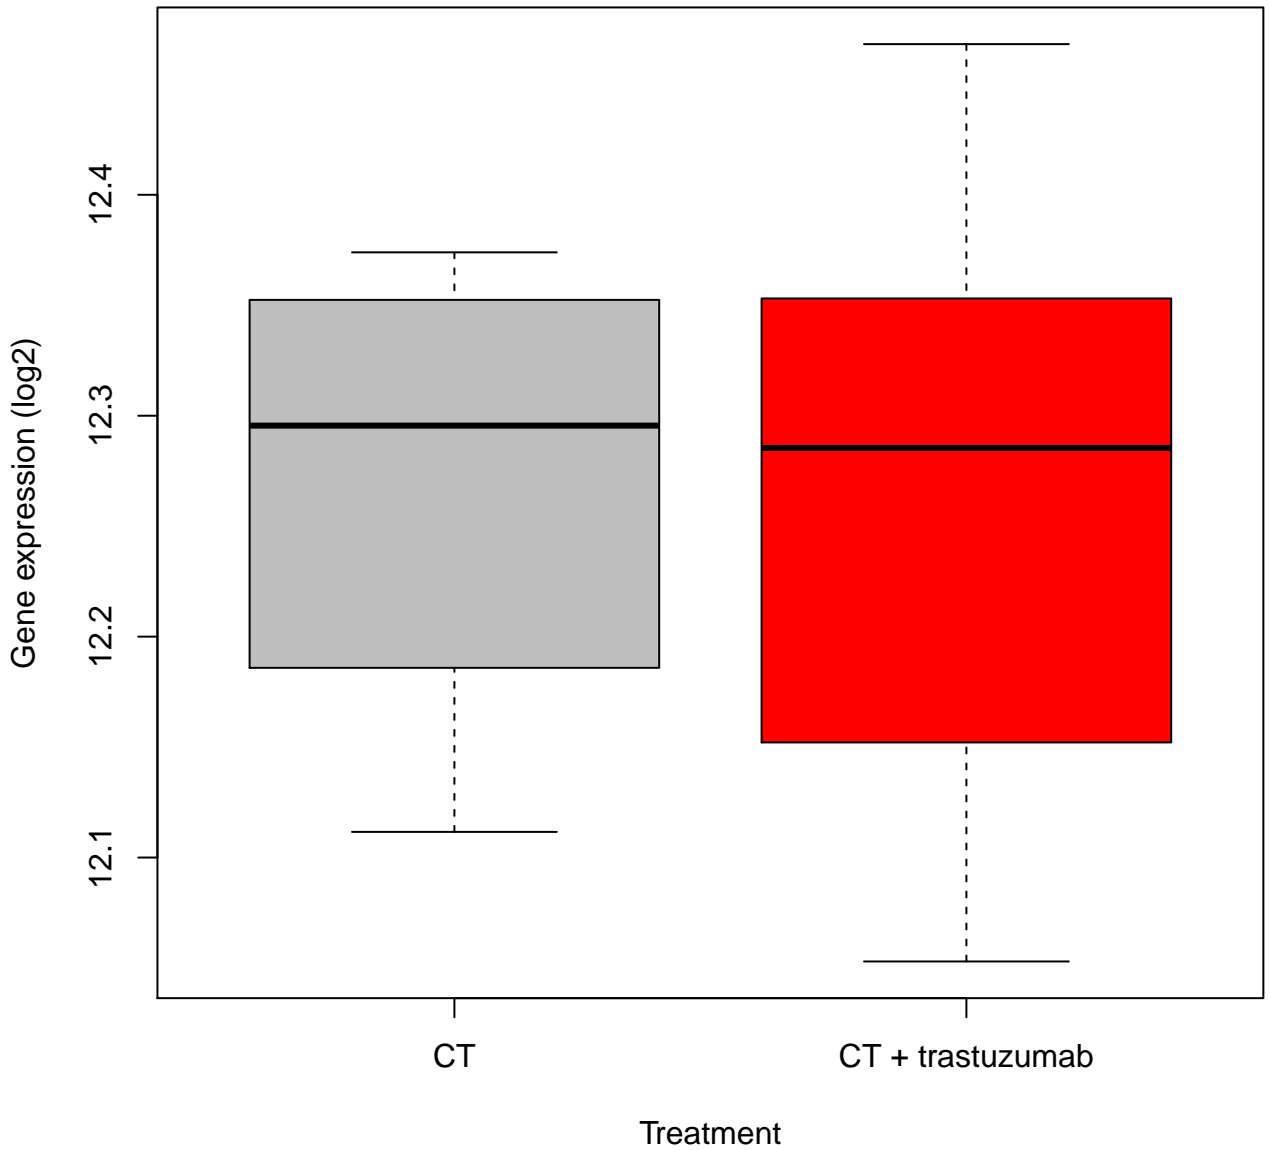

# ACSS1

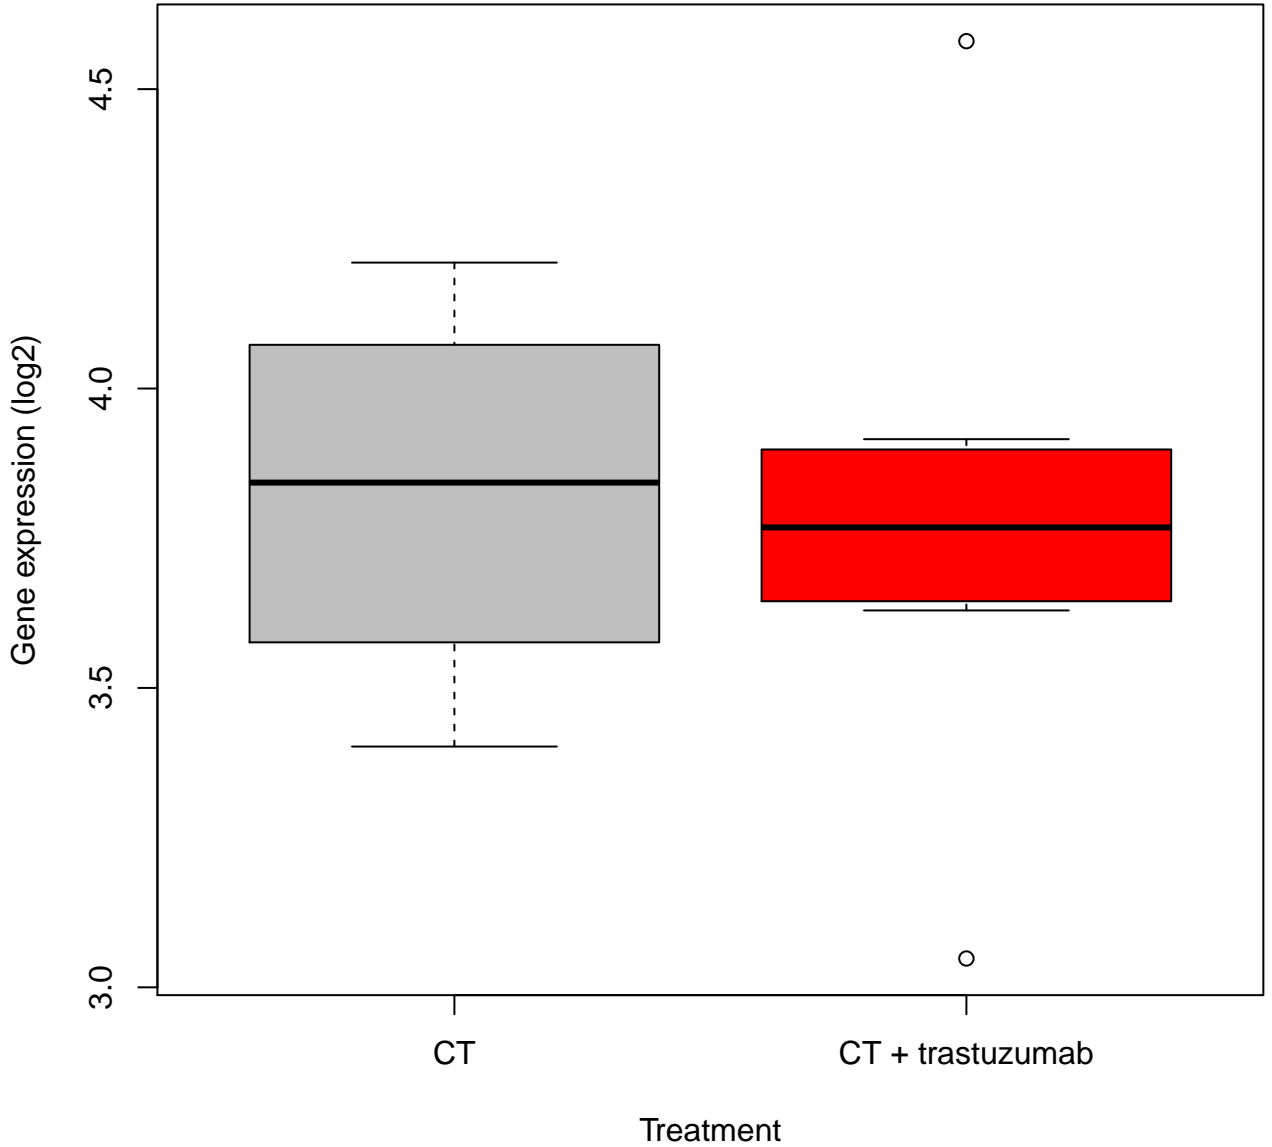

# AFF3

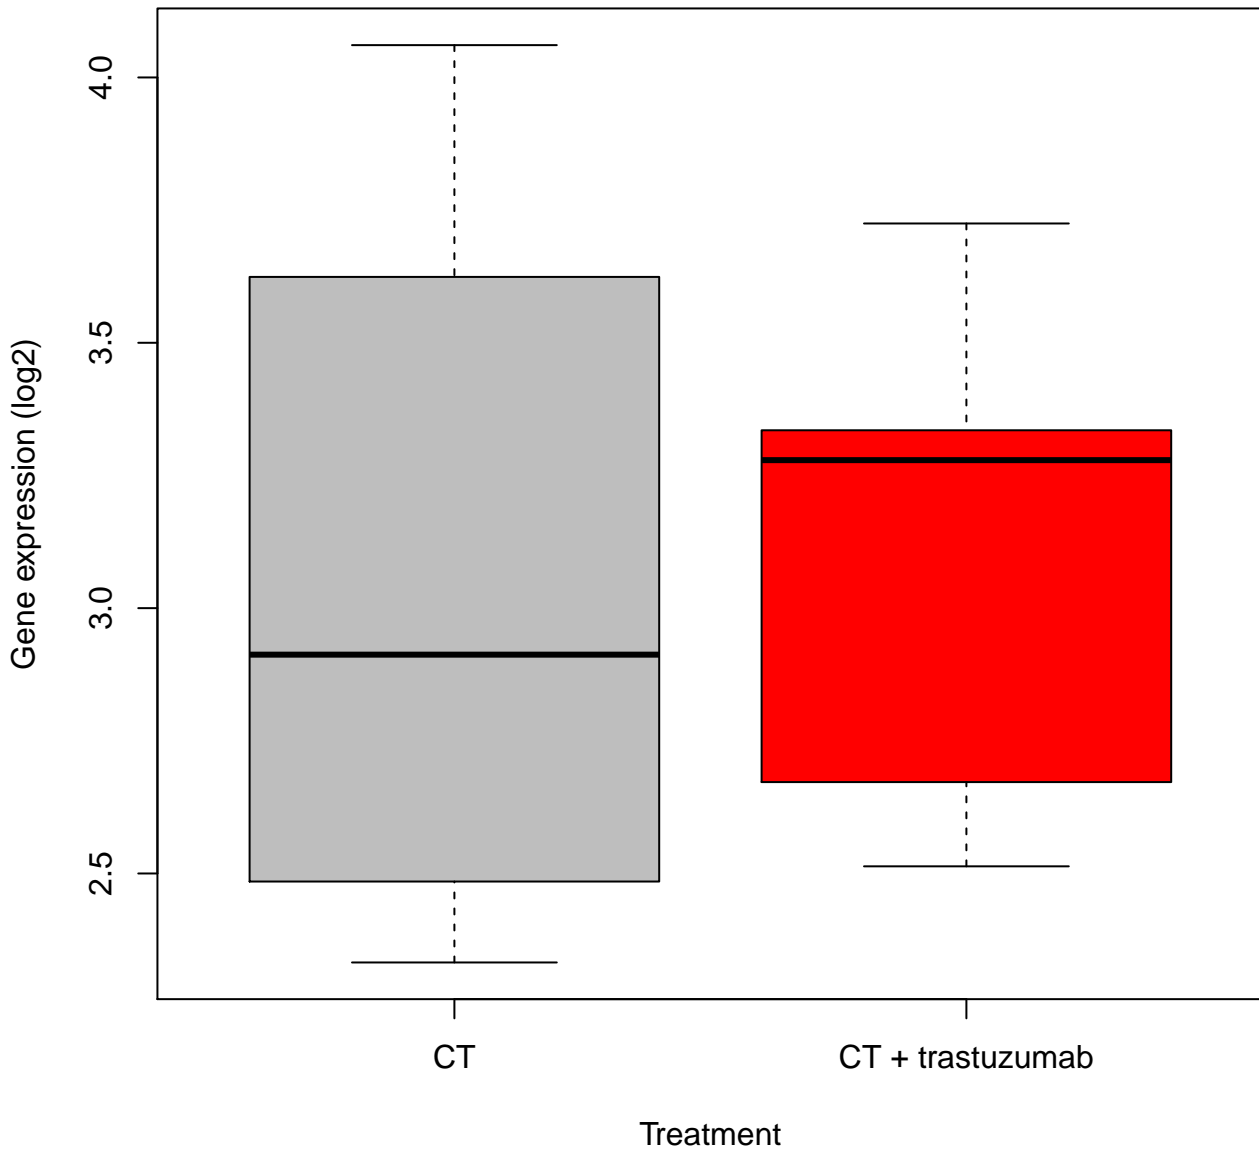

# AKR1C1

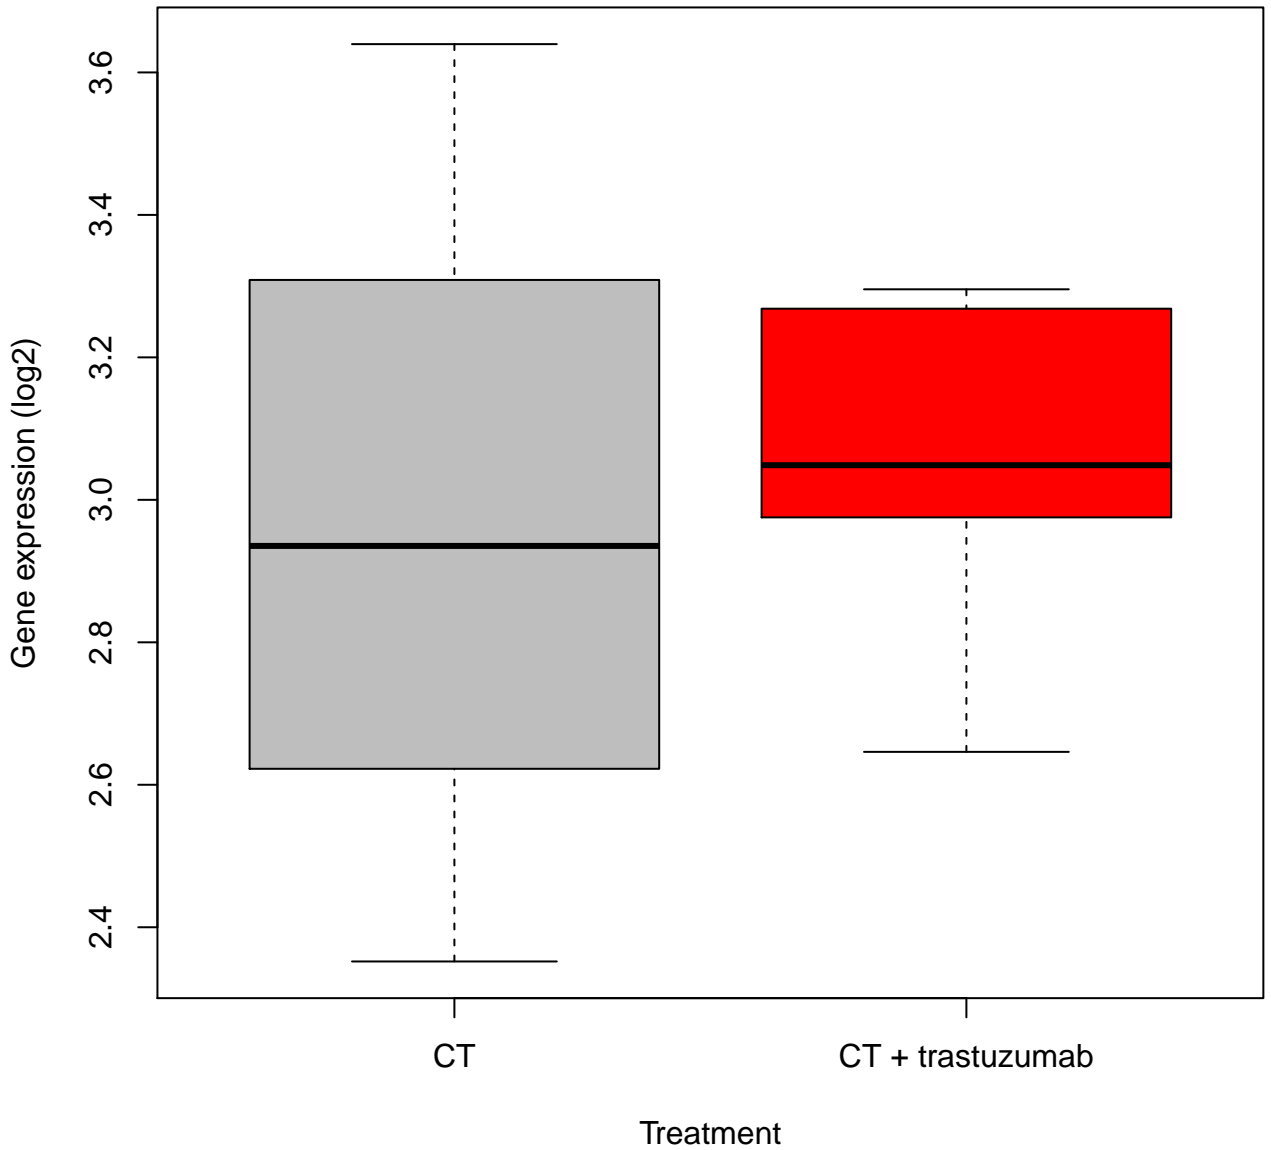

# APOL6

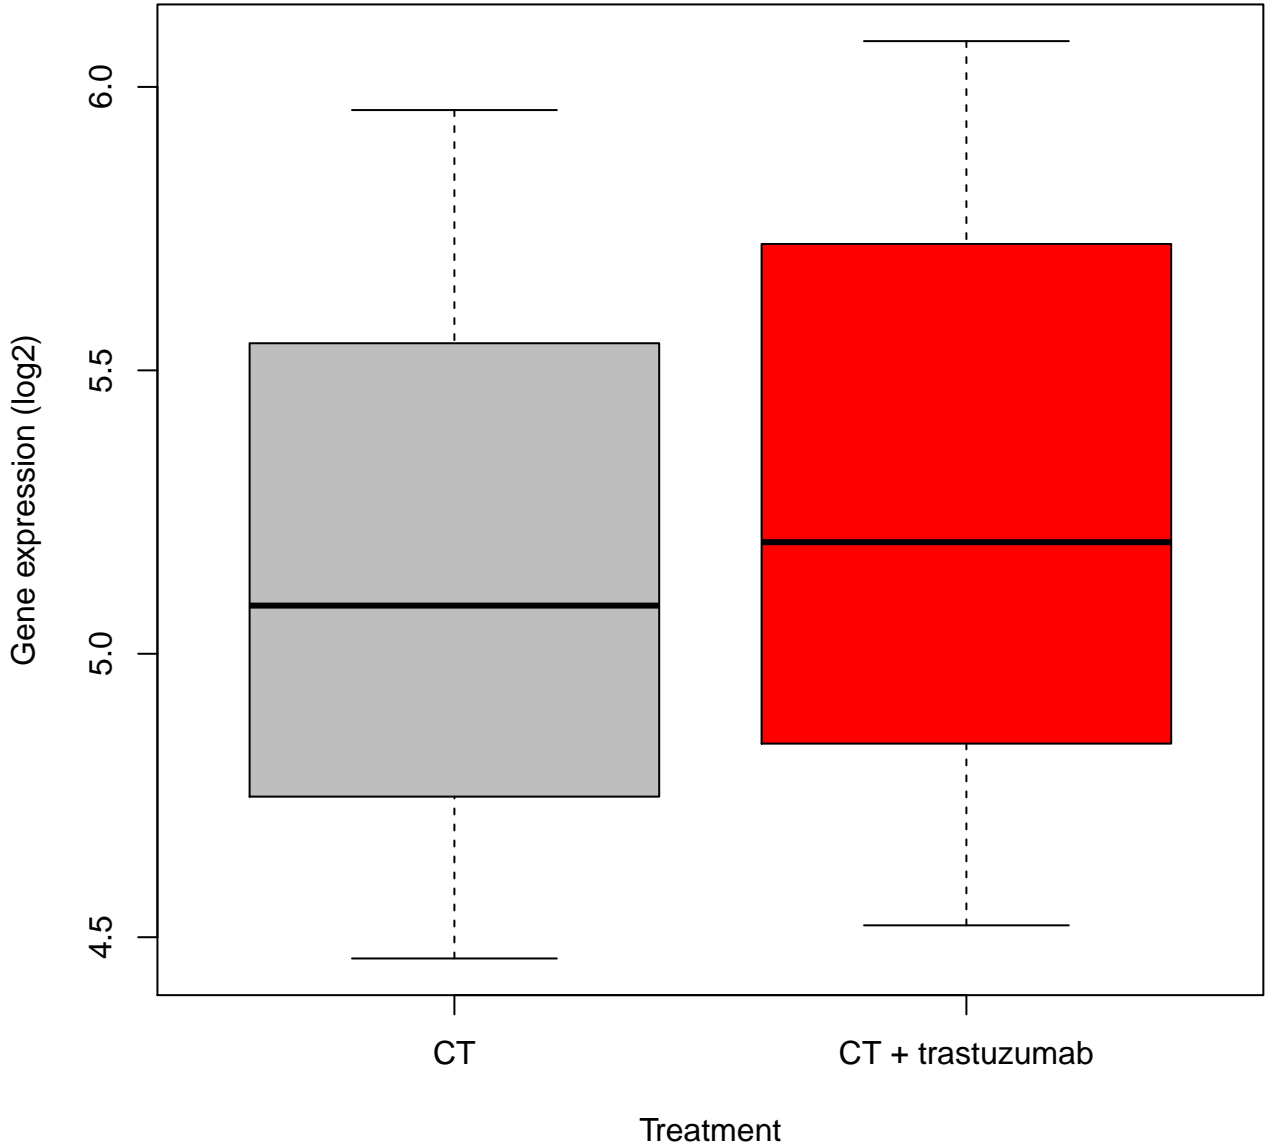

# ATP2A3

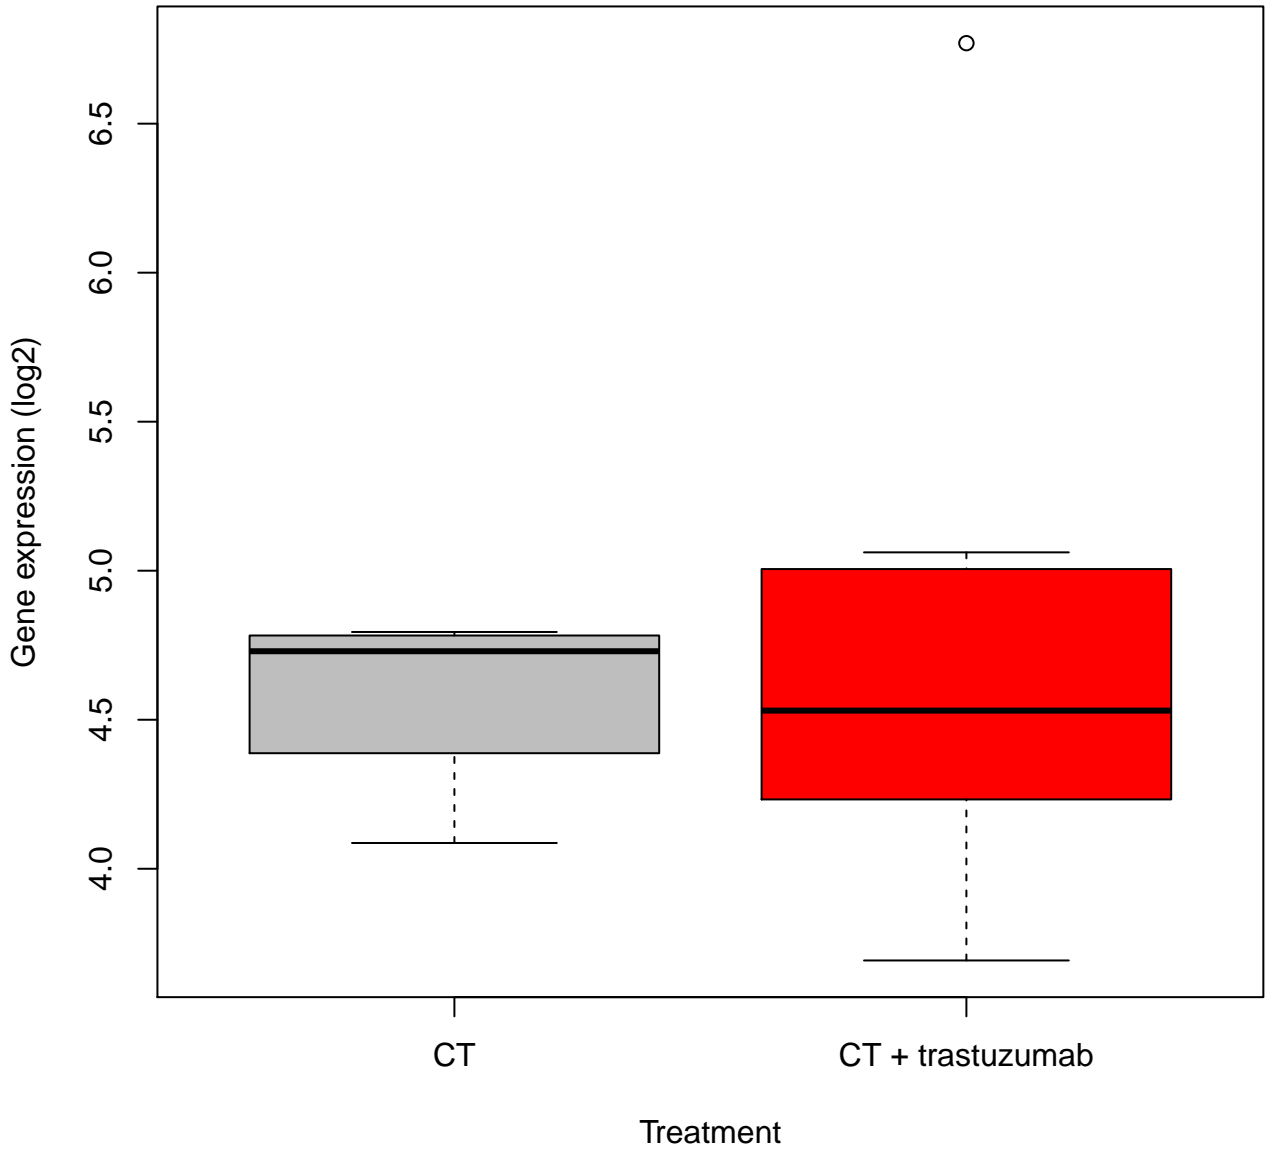

# BASP1

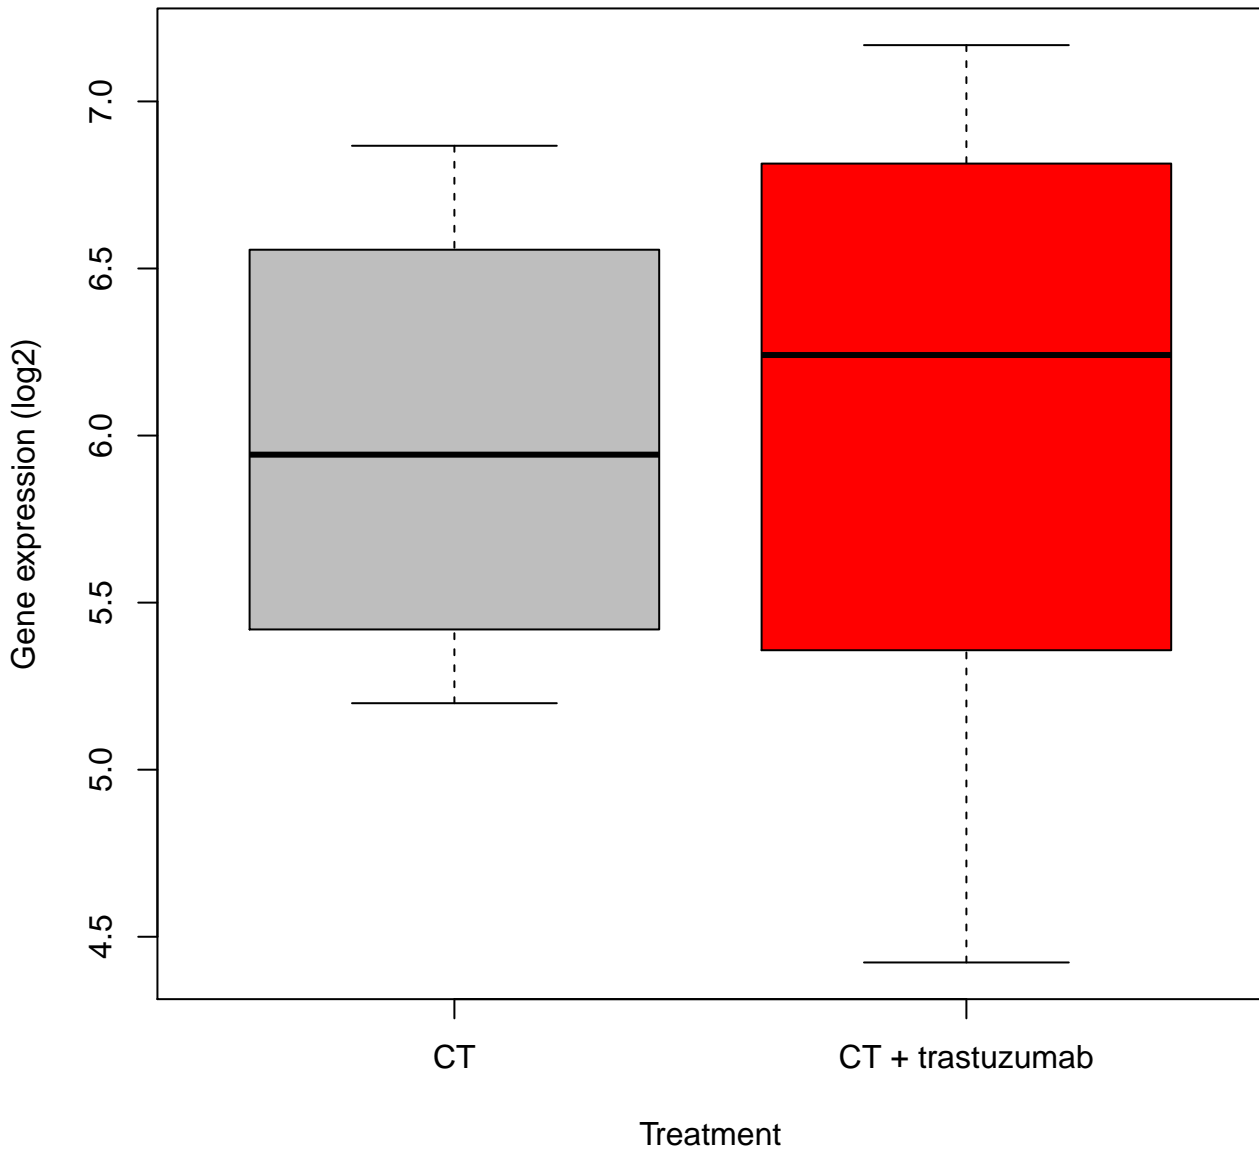

# C8orf4

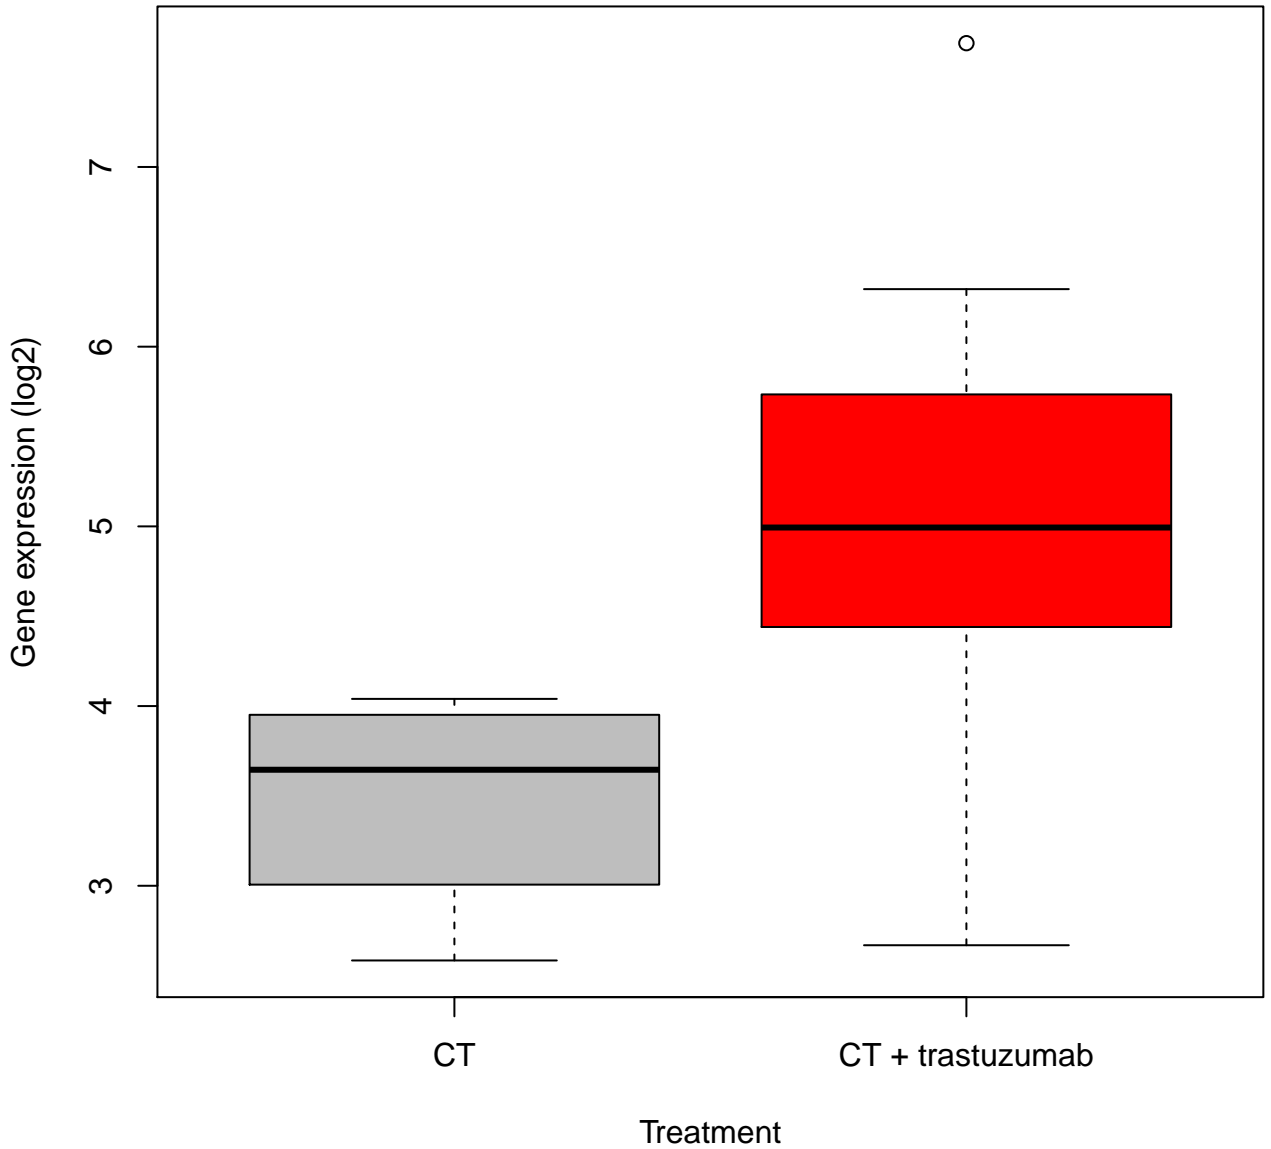



# CES1

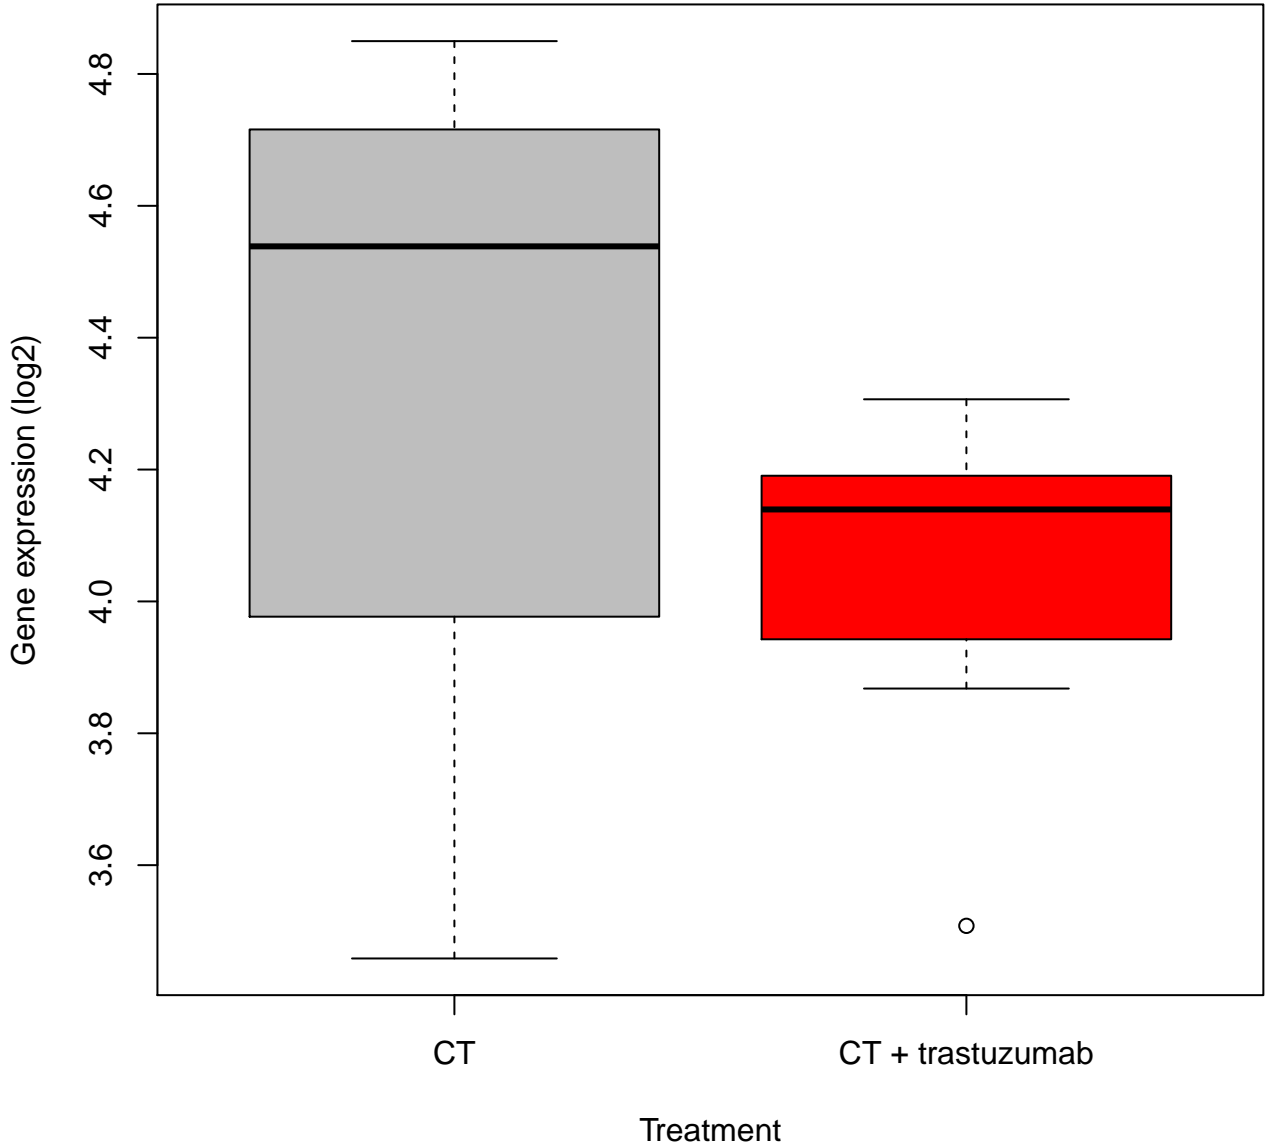

# CLDN1

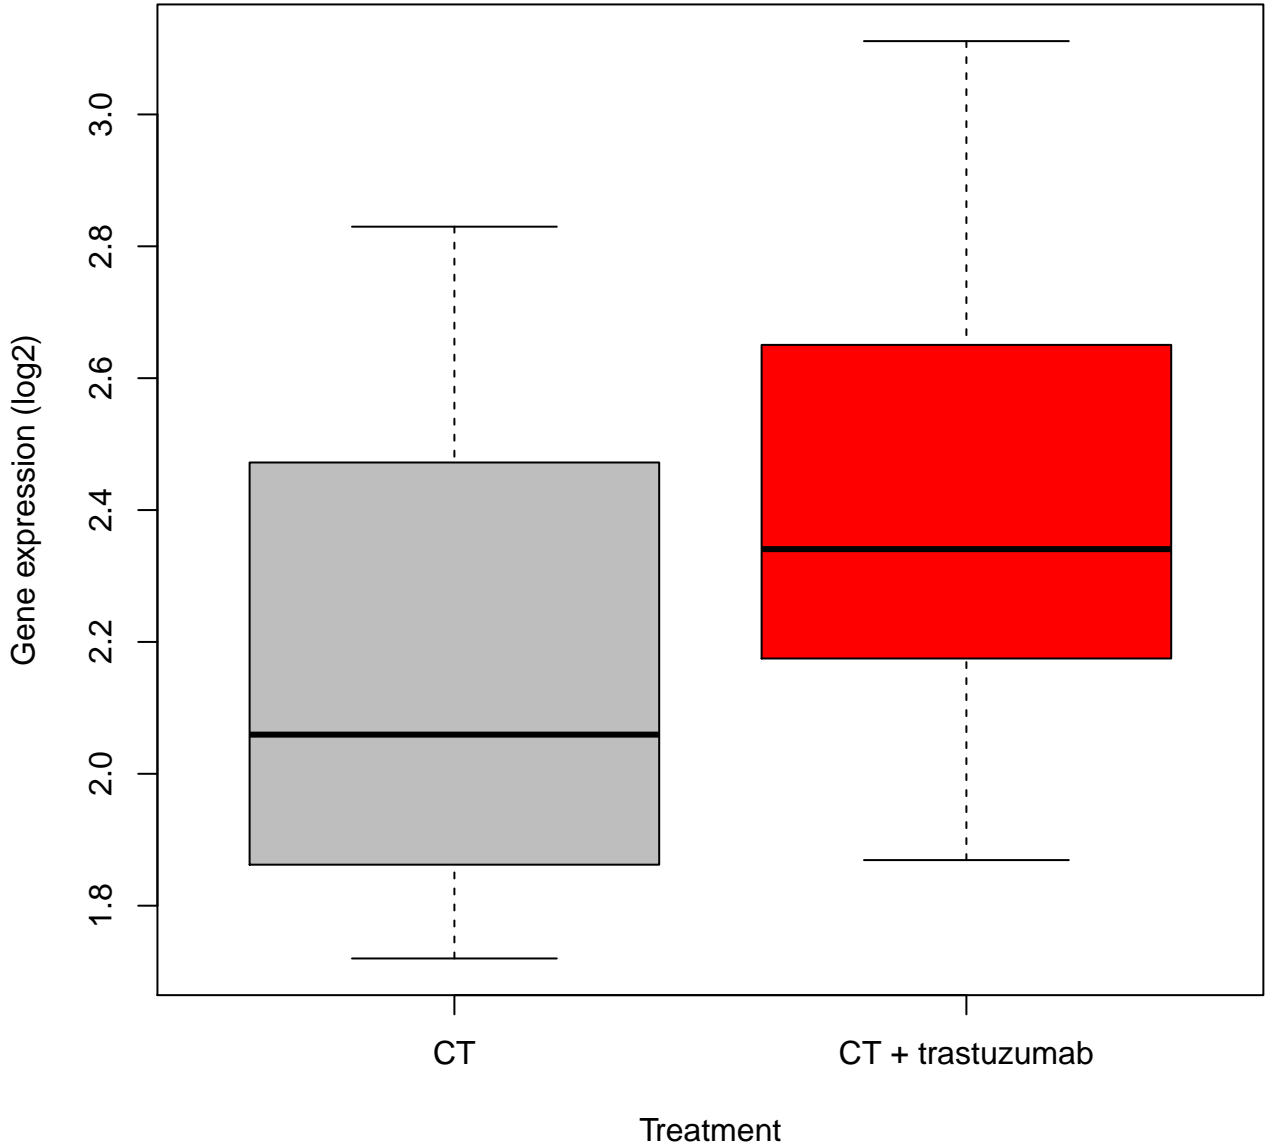

# COLEC12

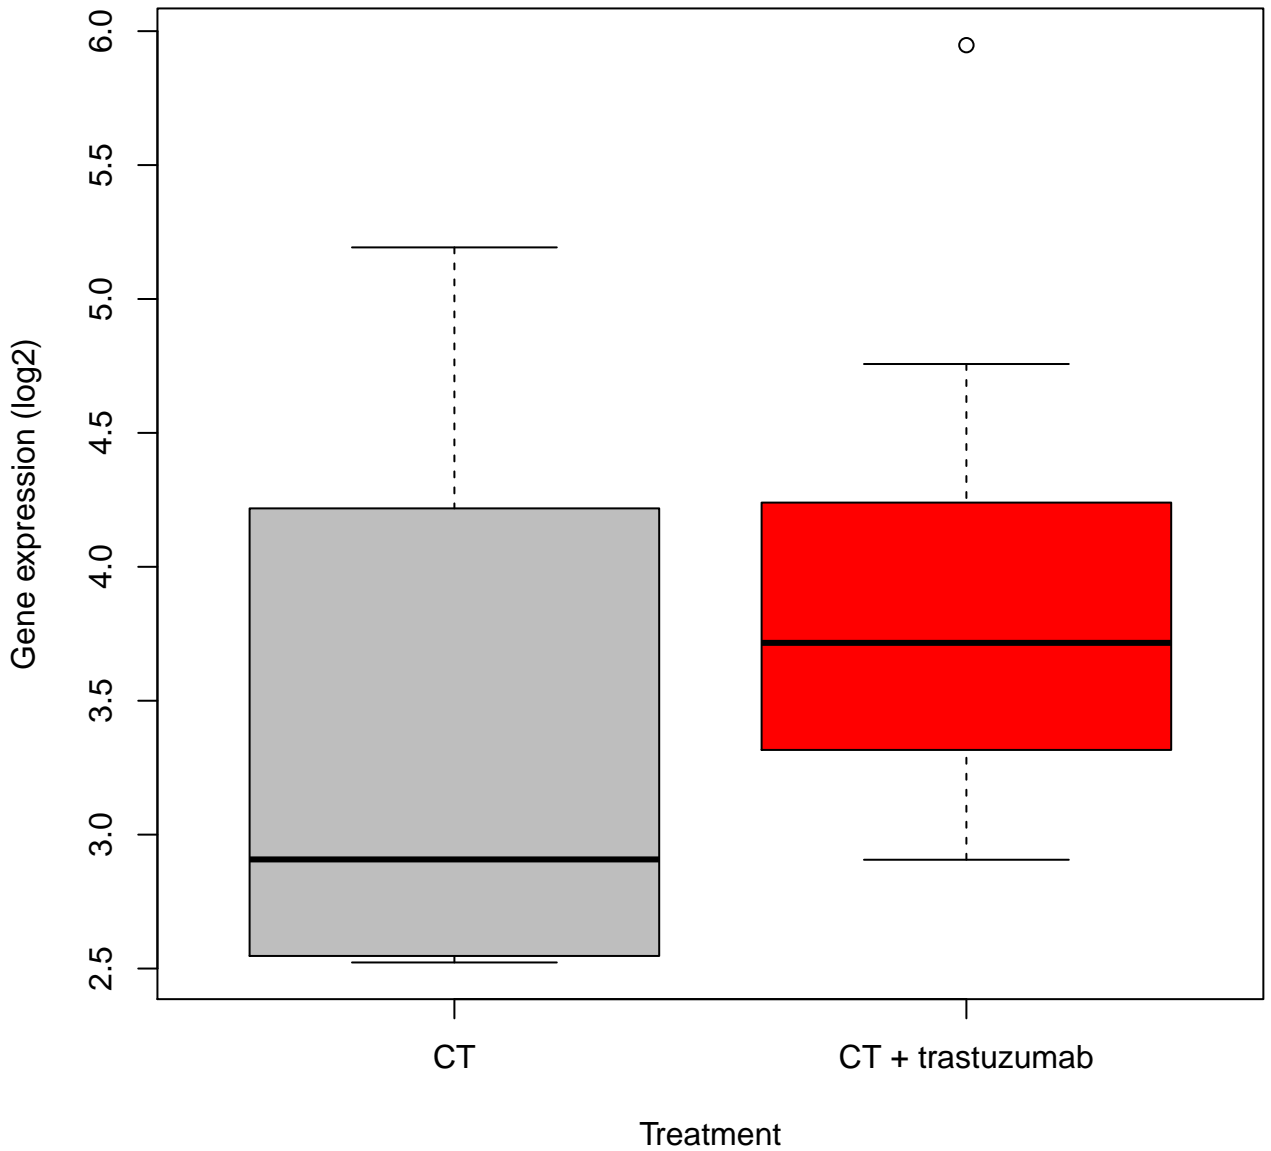

# CTGF

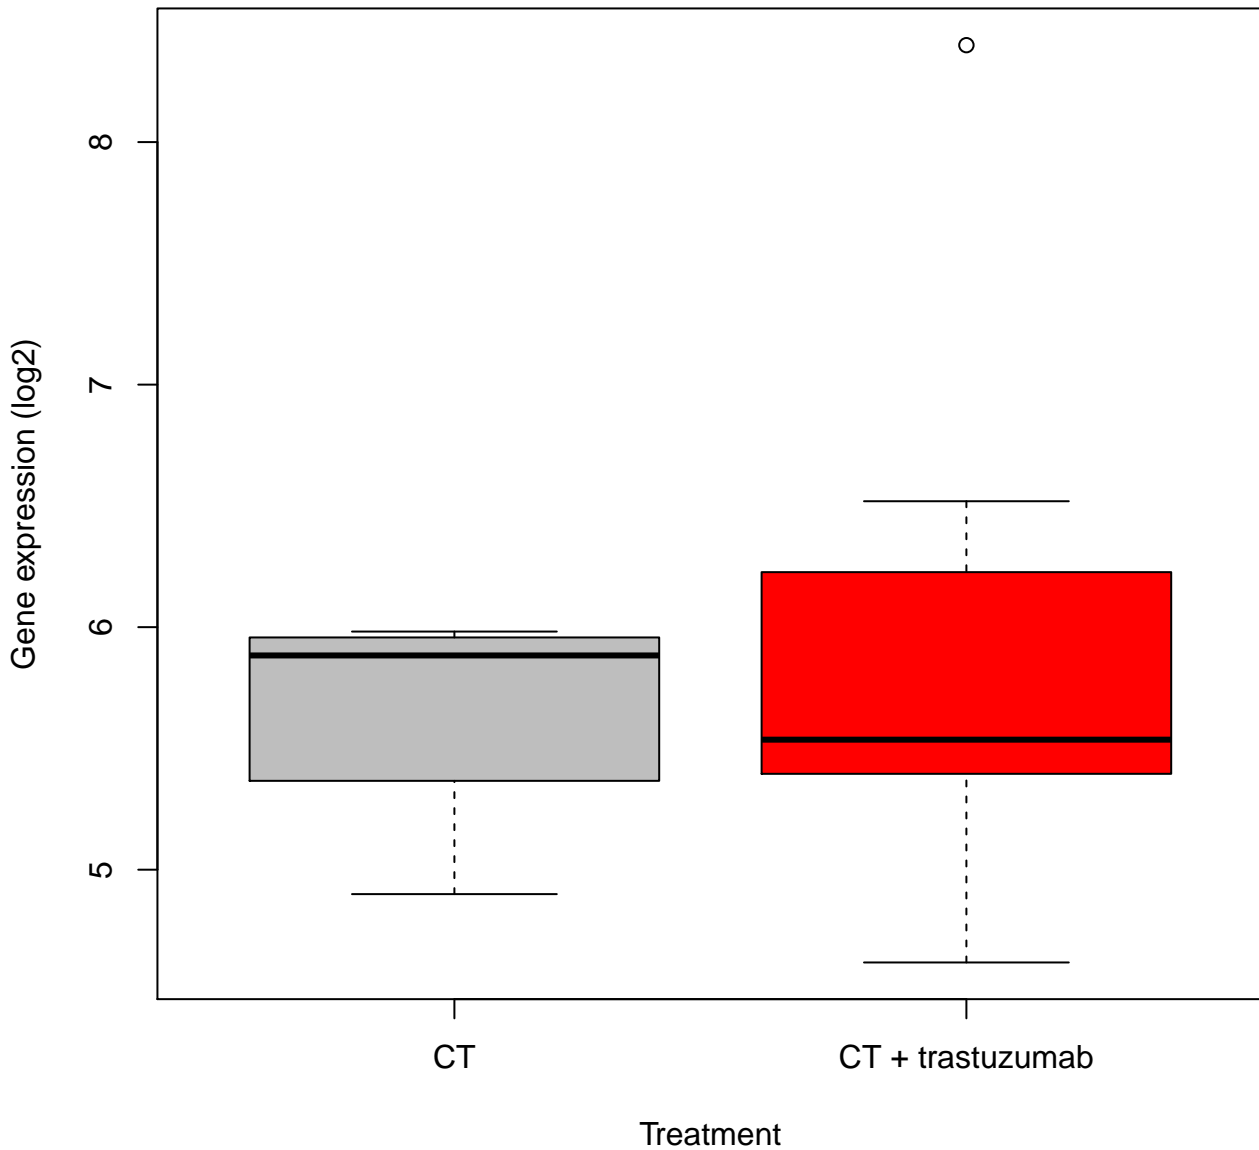

# ECI2

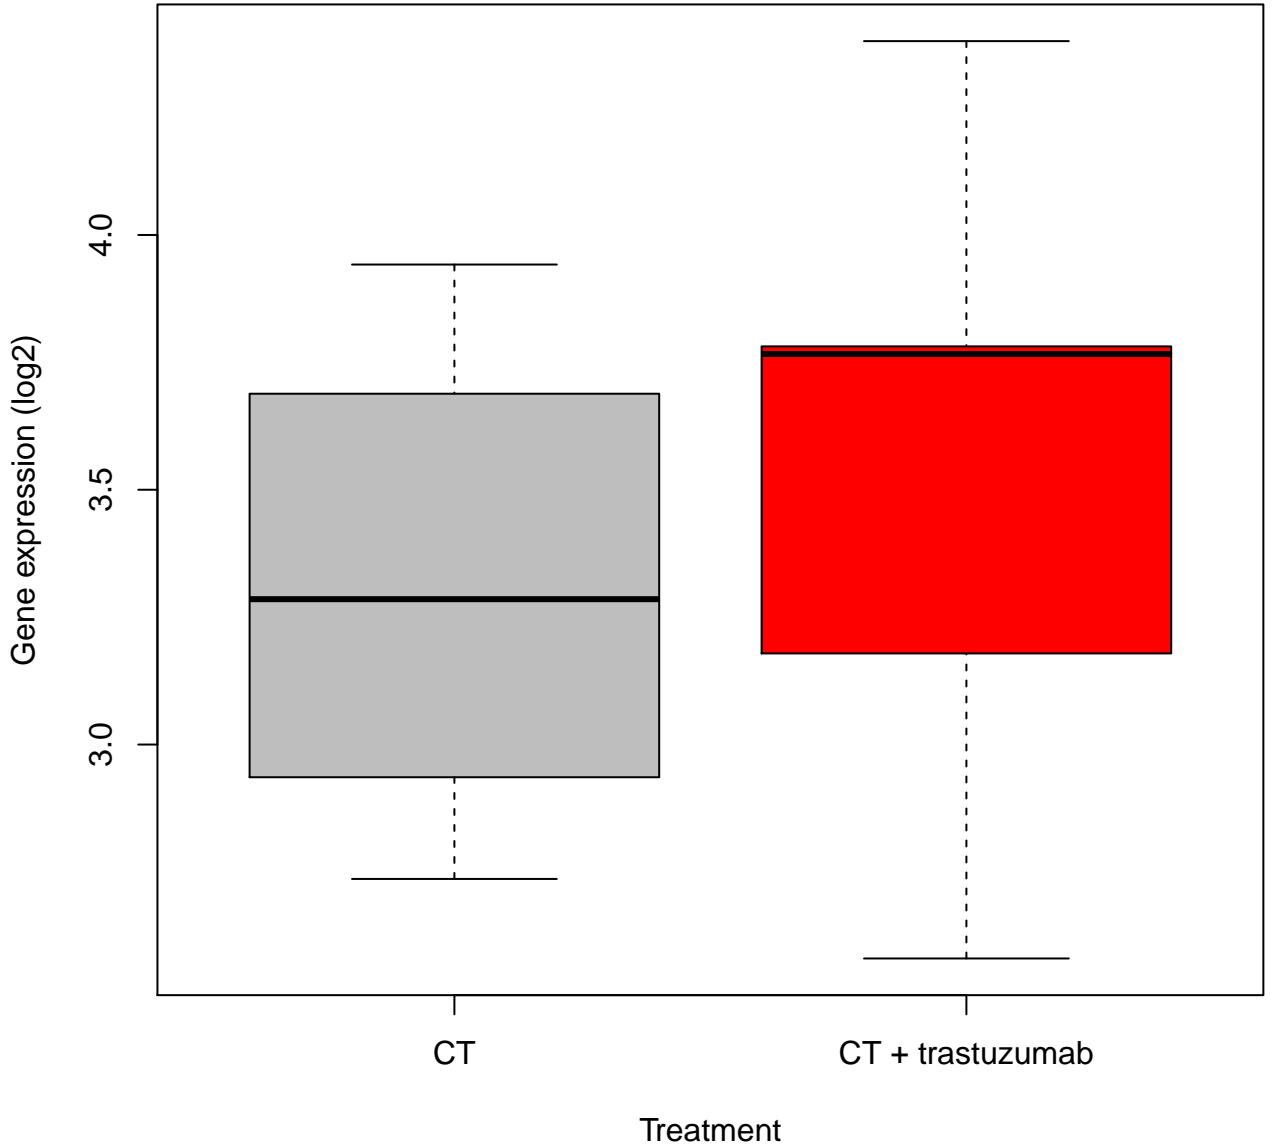

# FXJD5

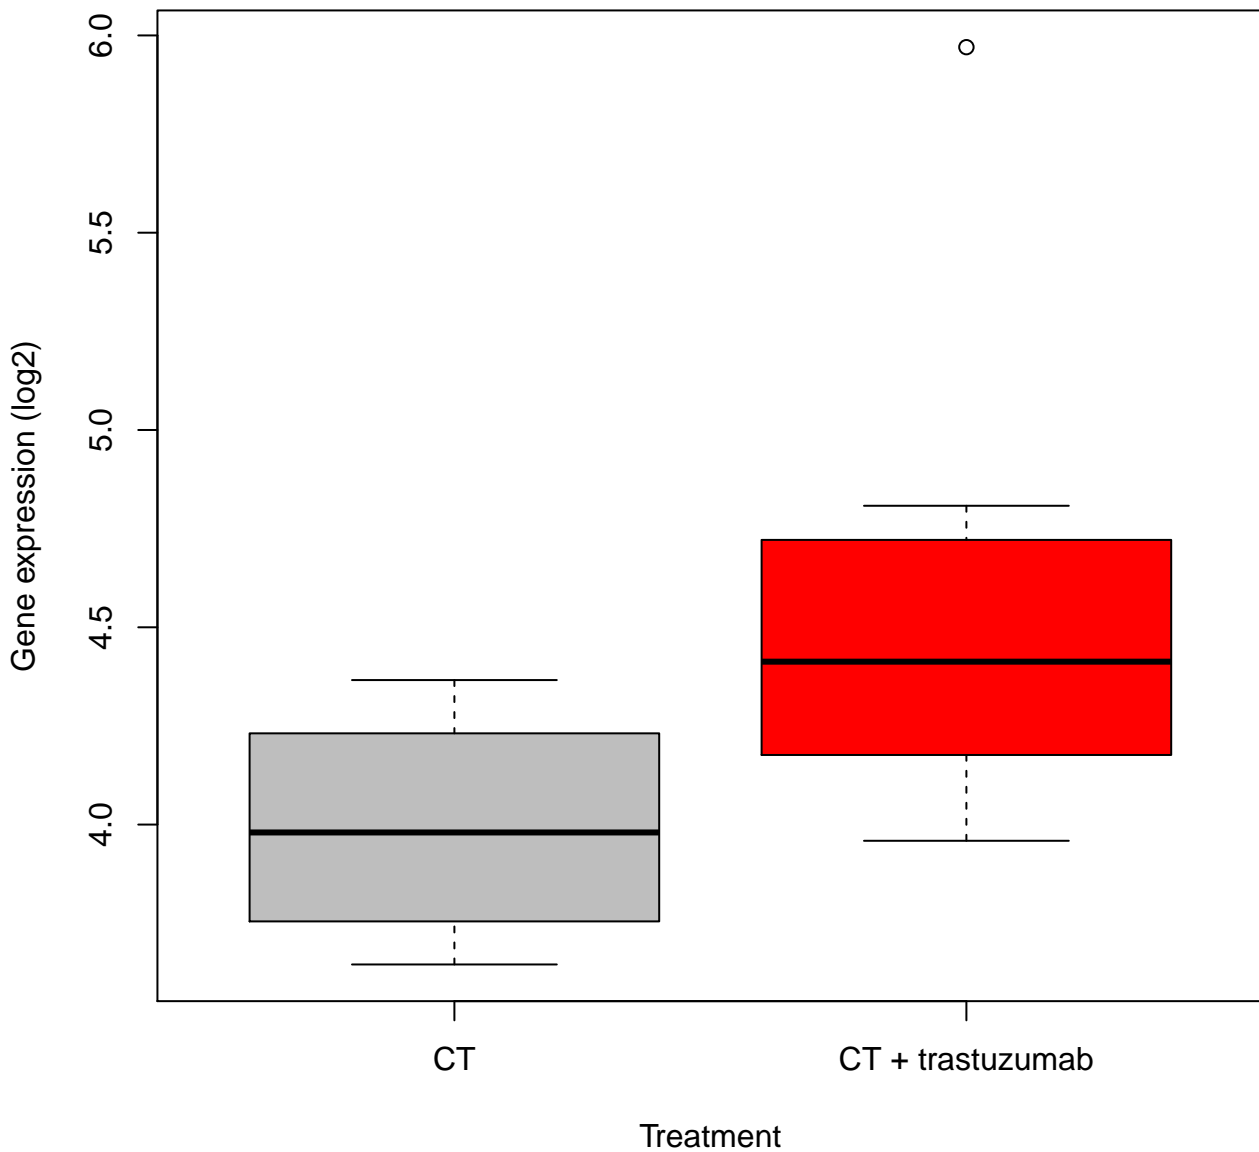

# GBP1

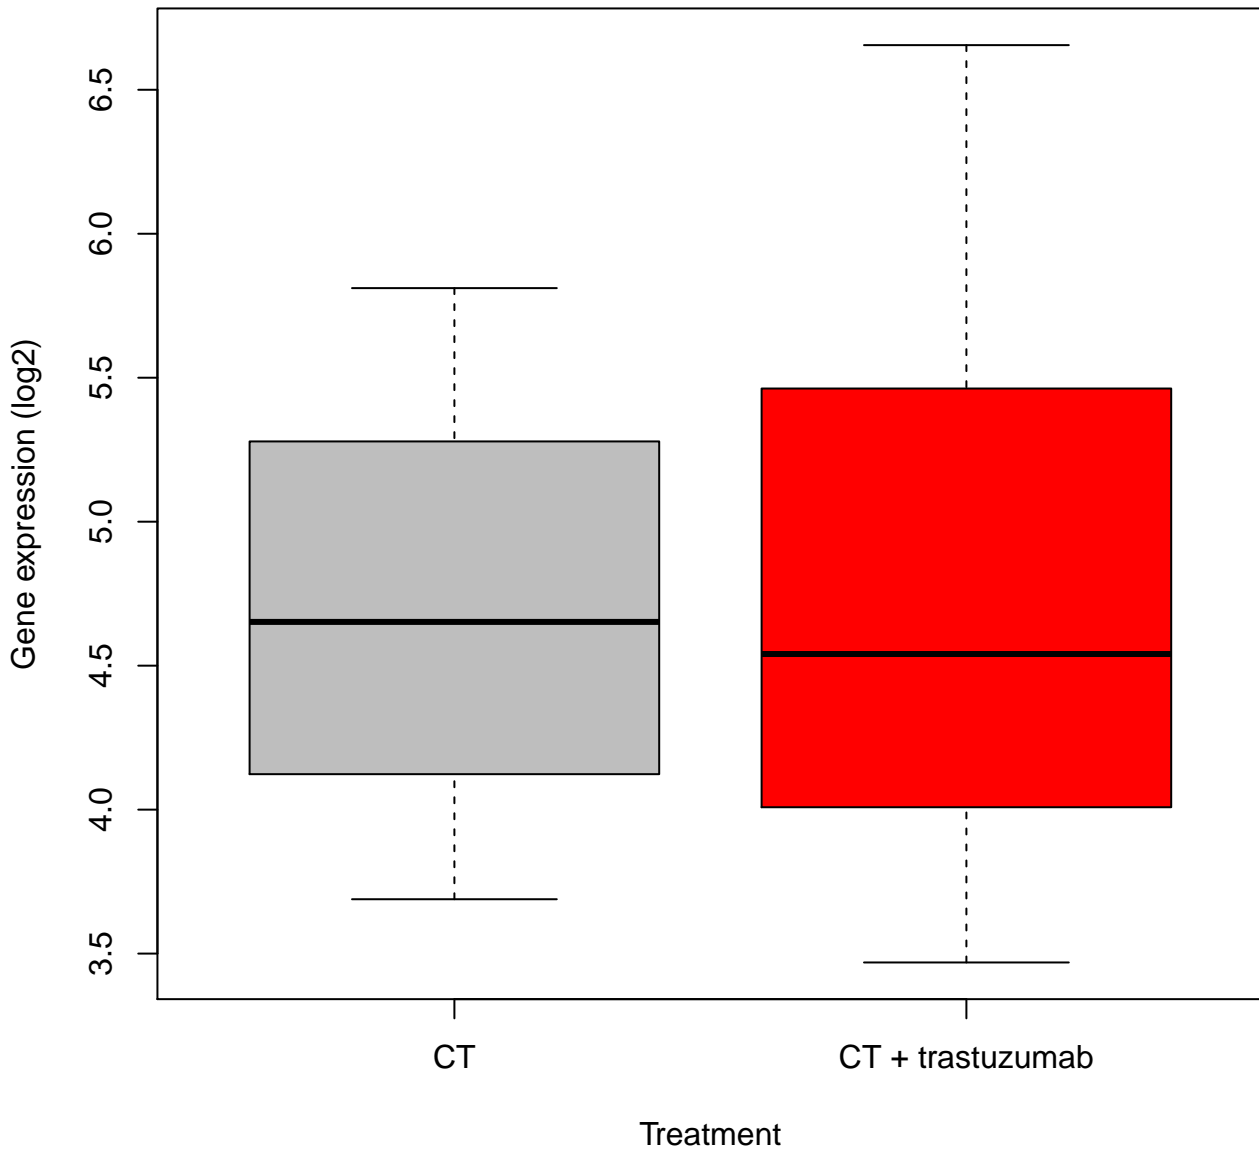

# GDF15

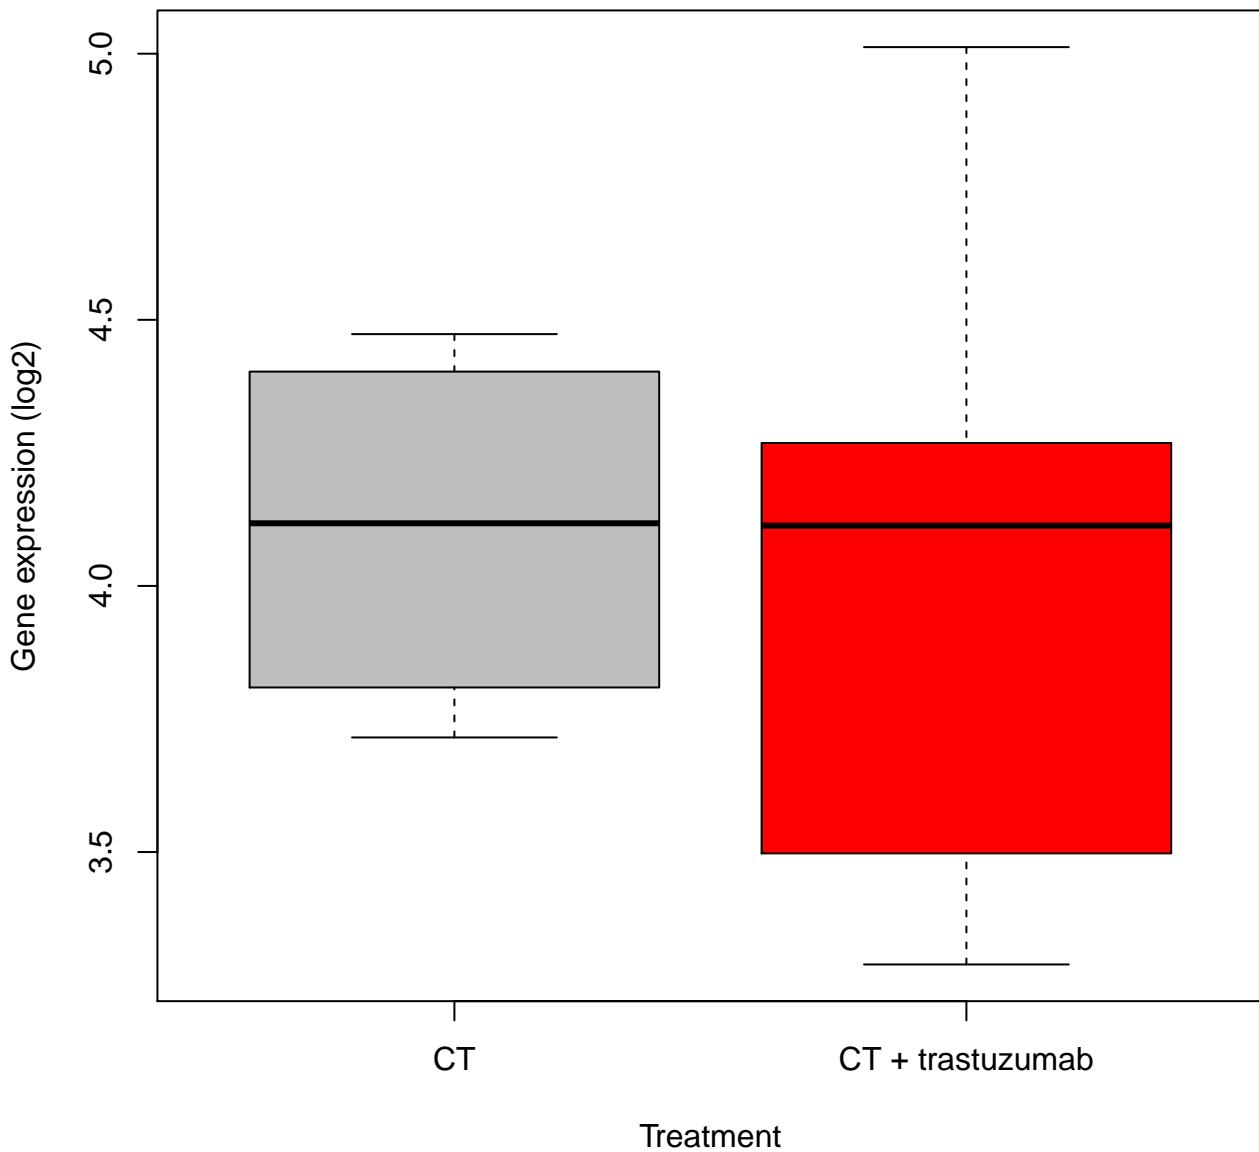



# GREB1

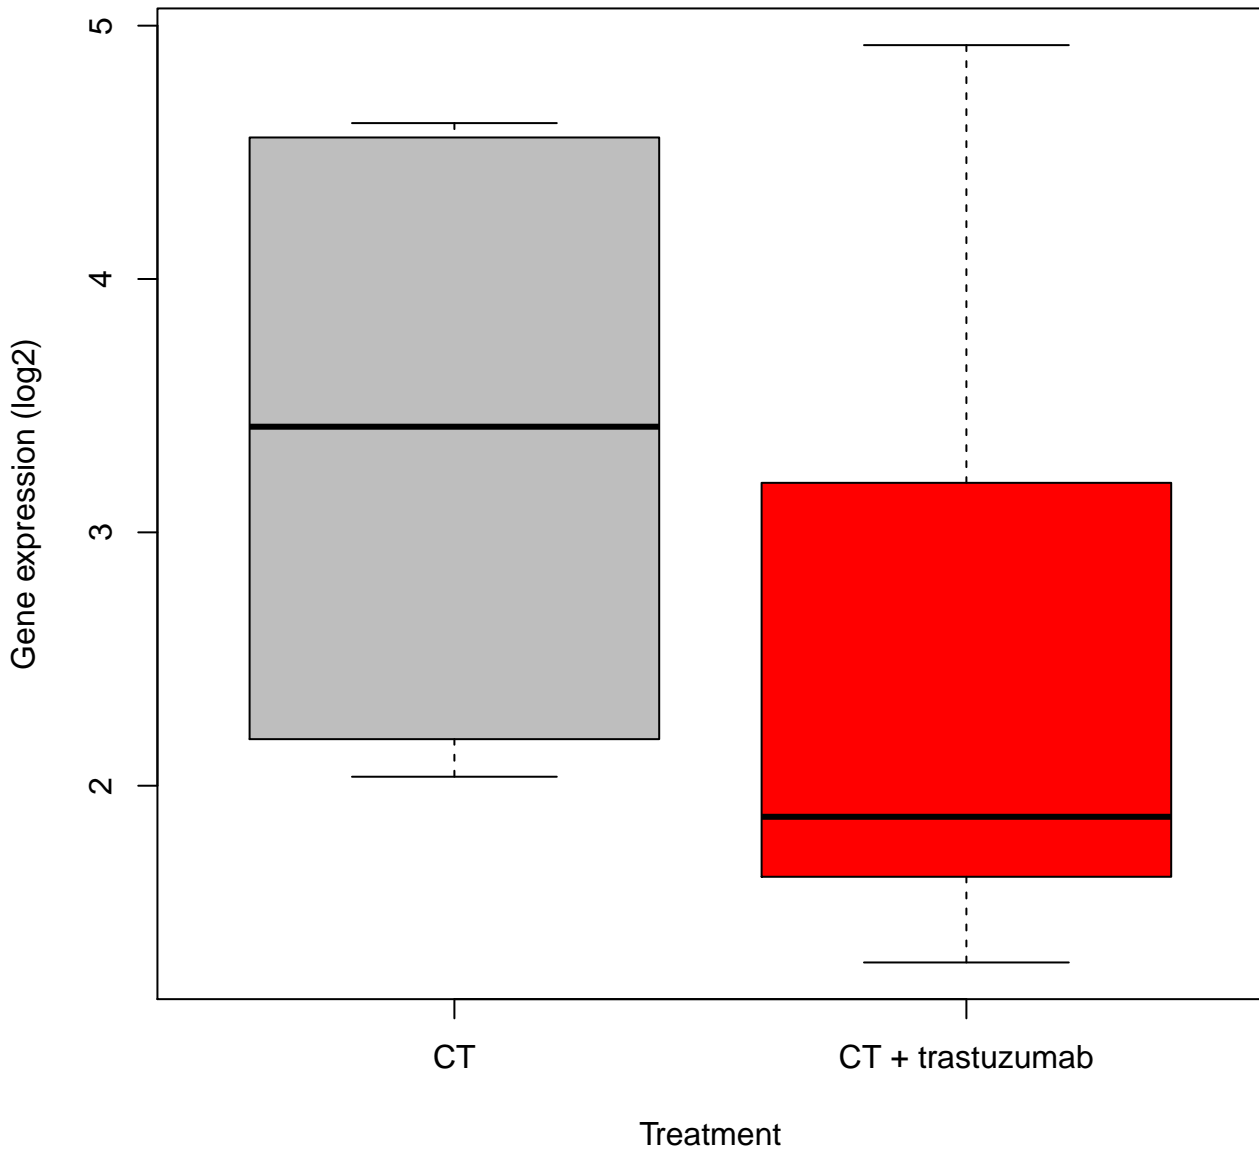

# IFI16

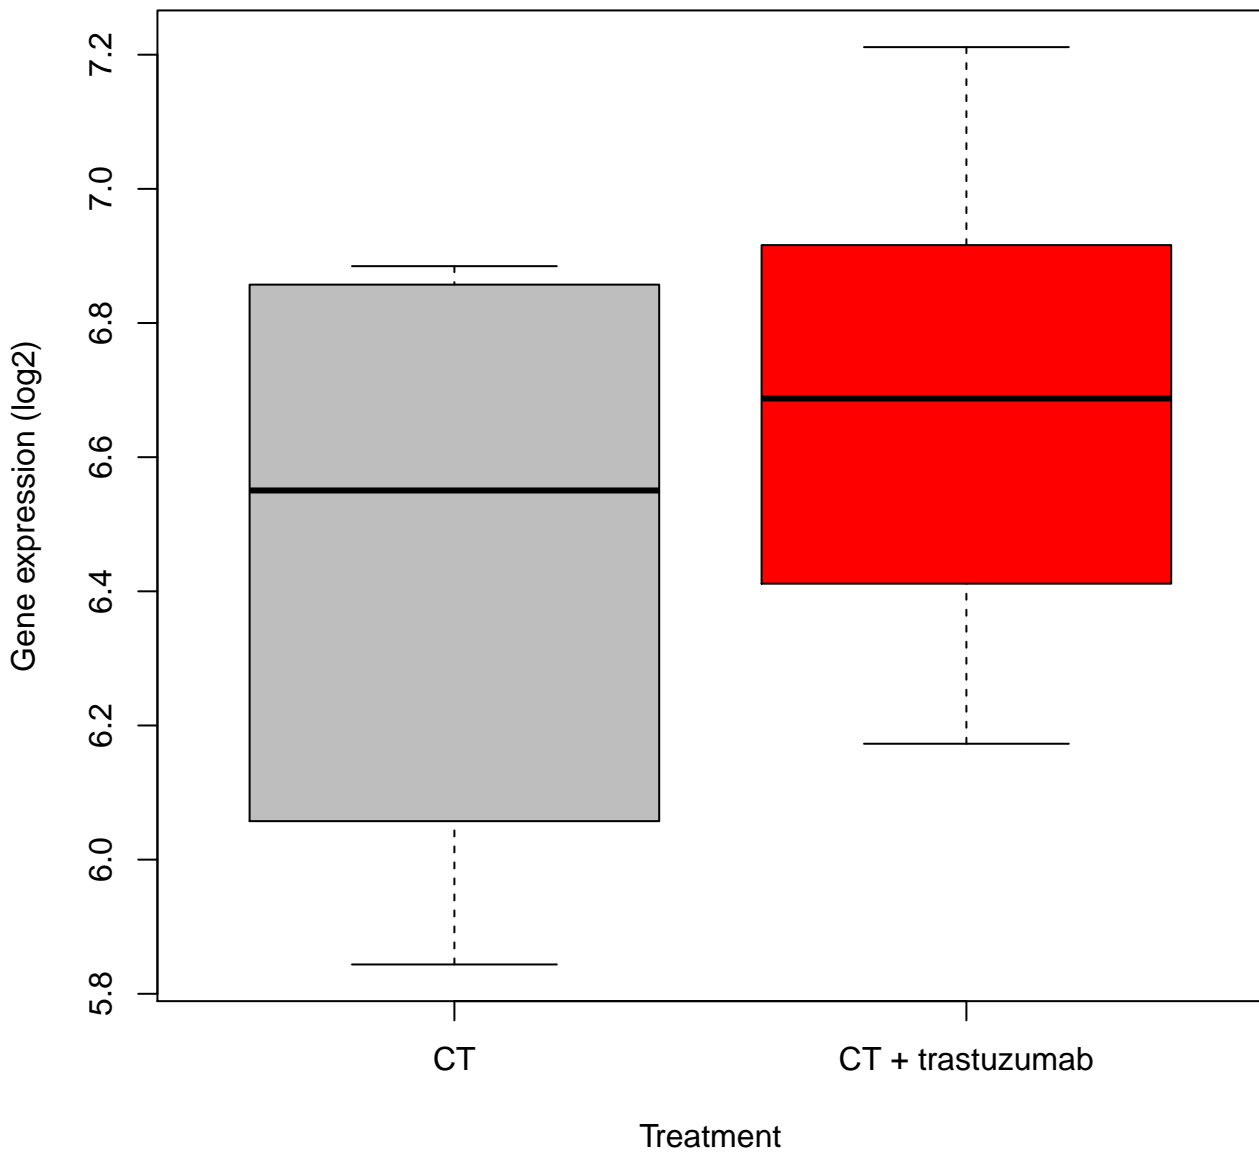

# IFI27

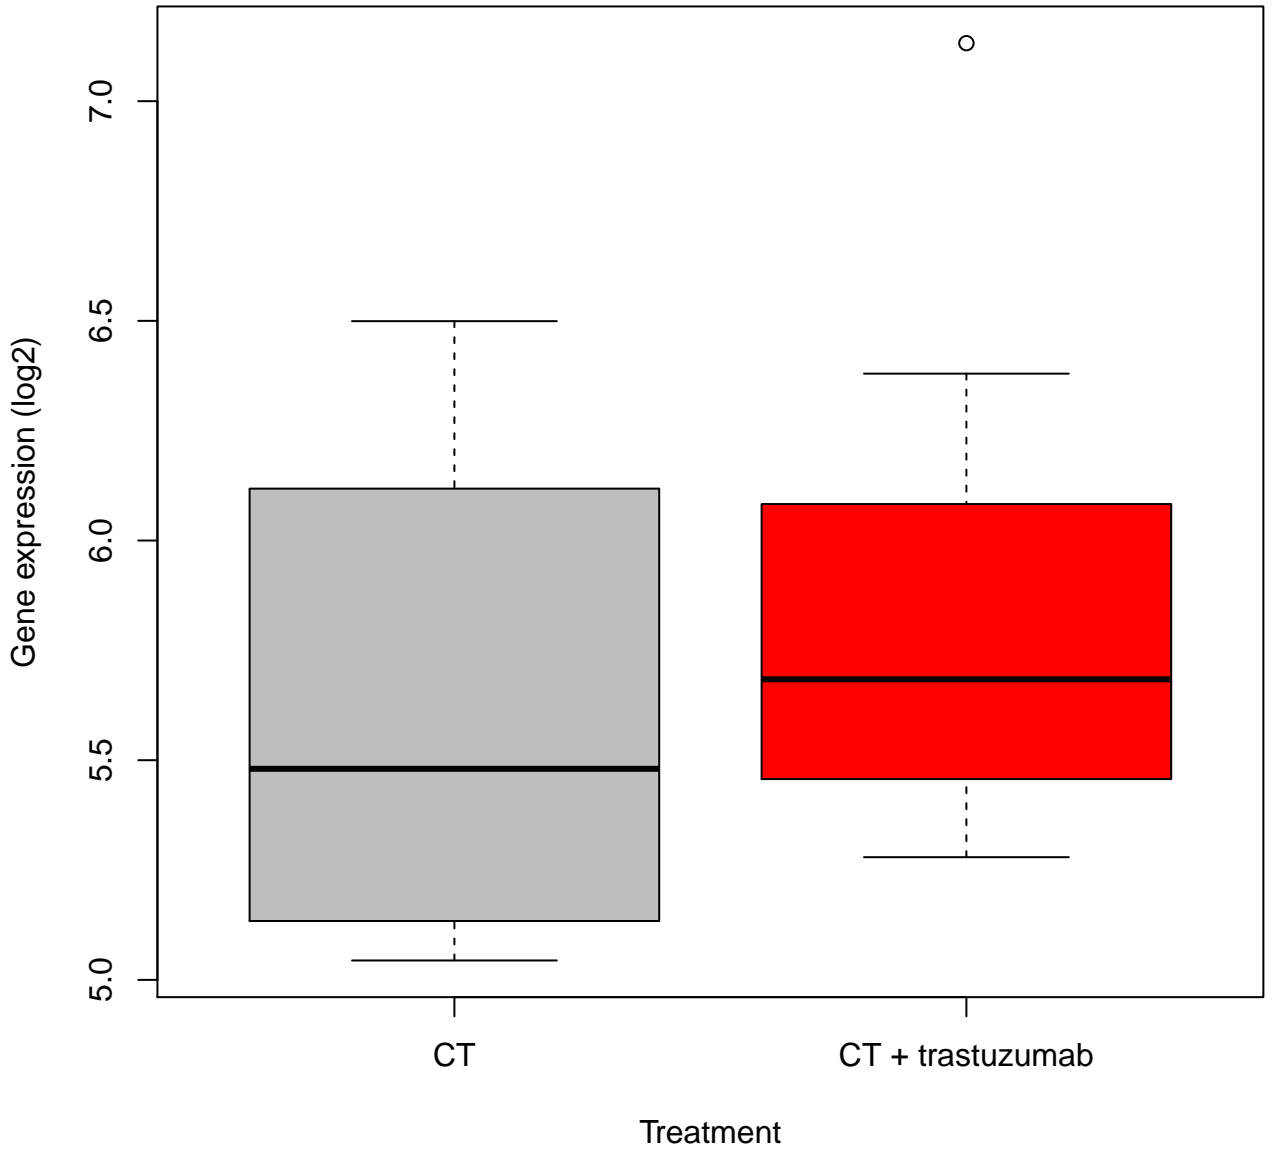

# IFITM1

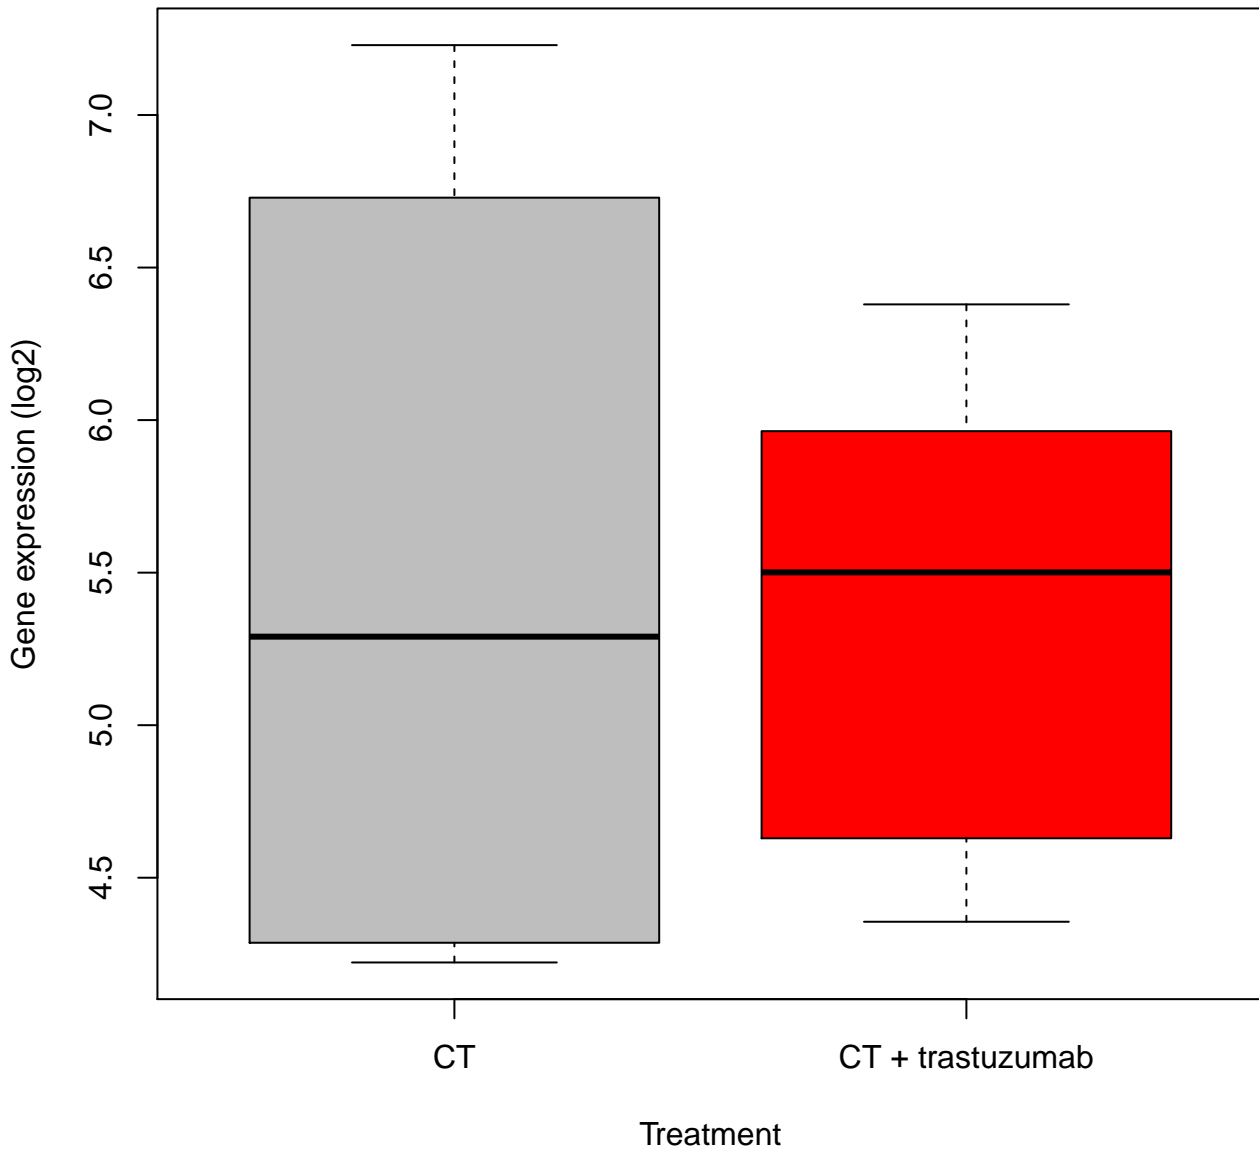

# IL8

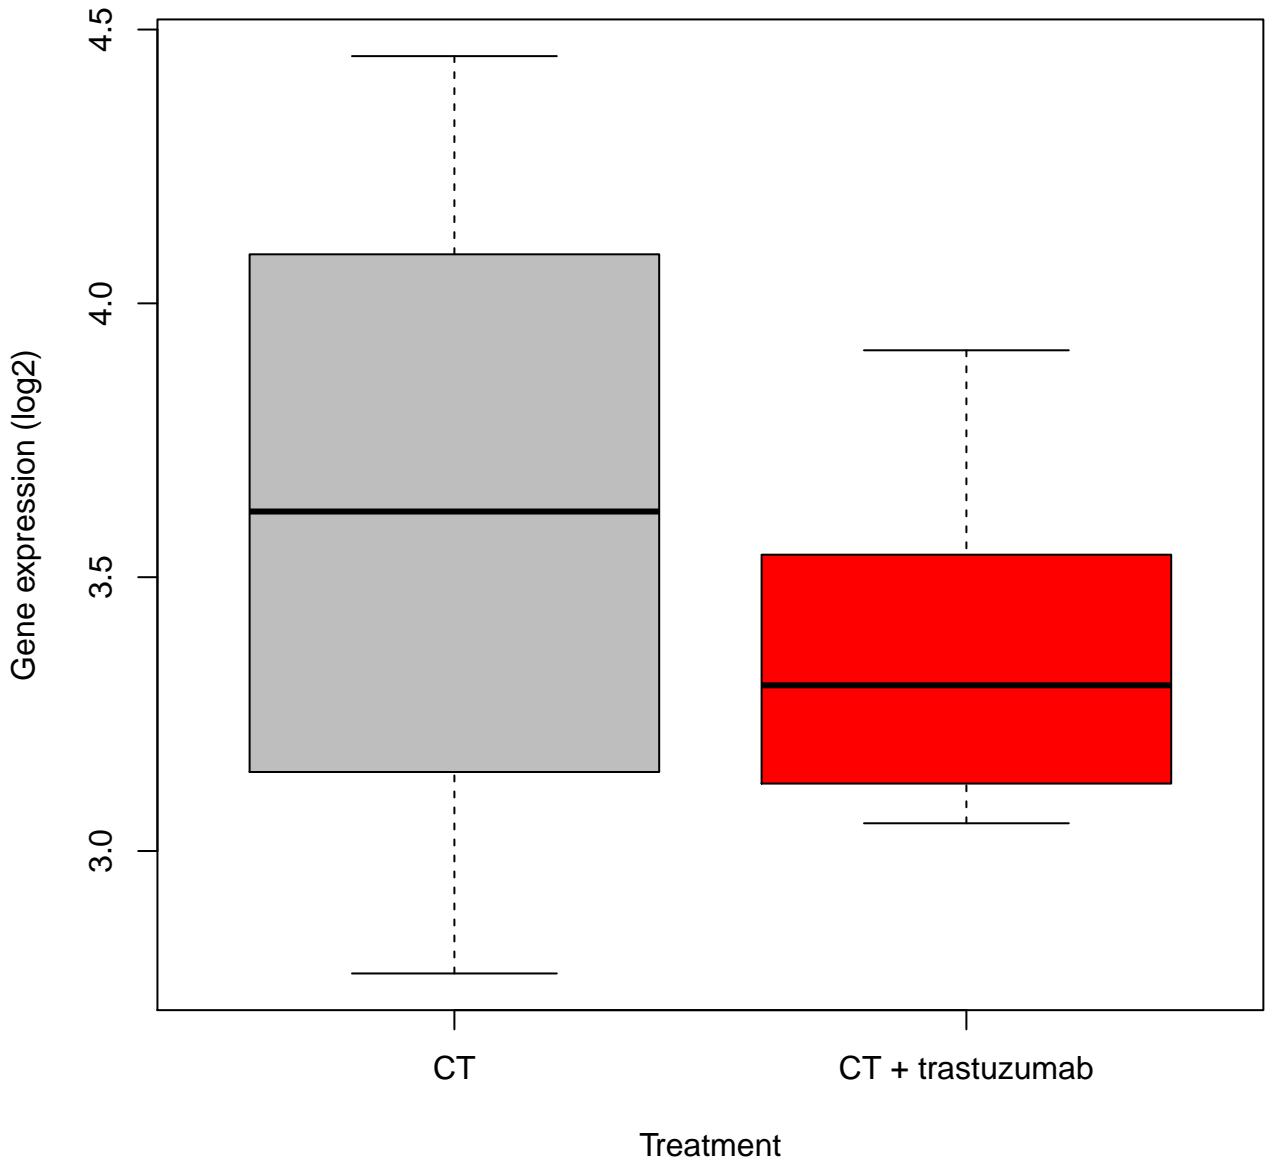

# KLK5

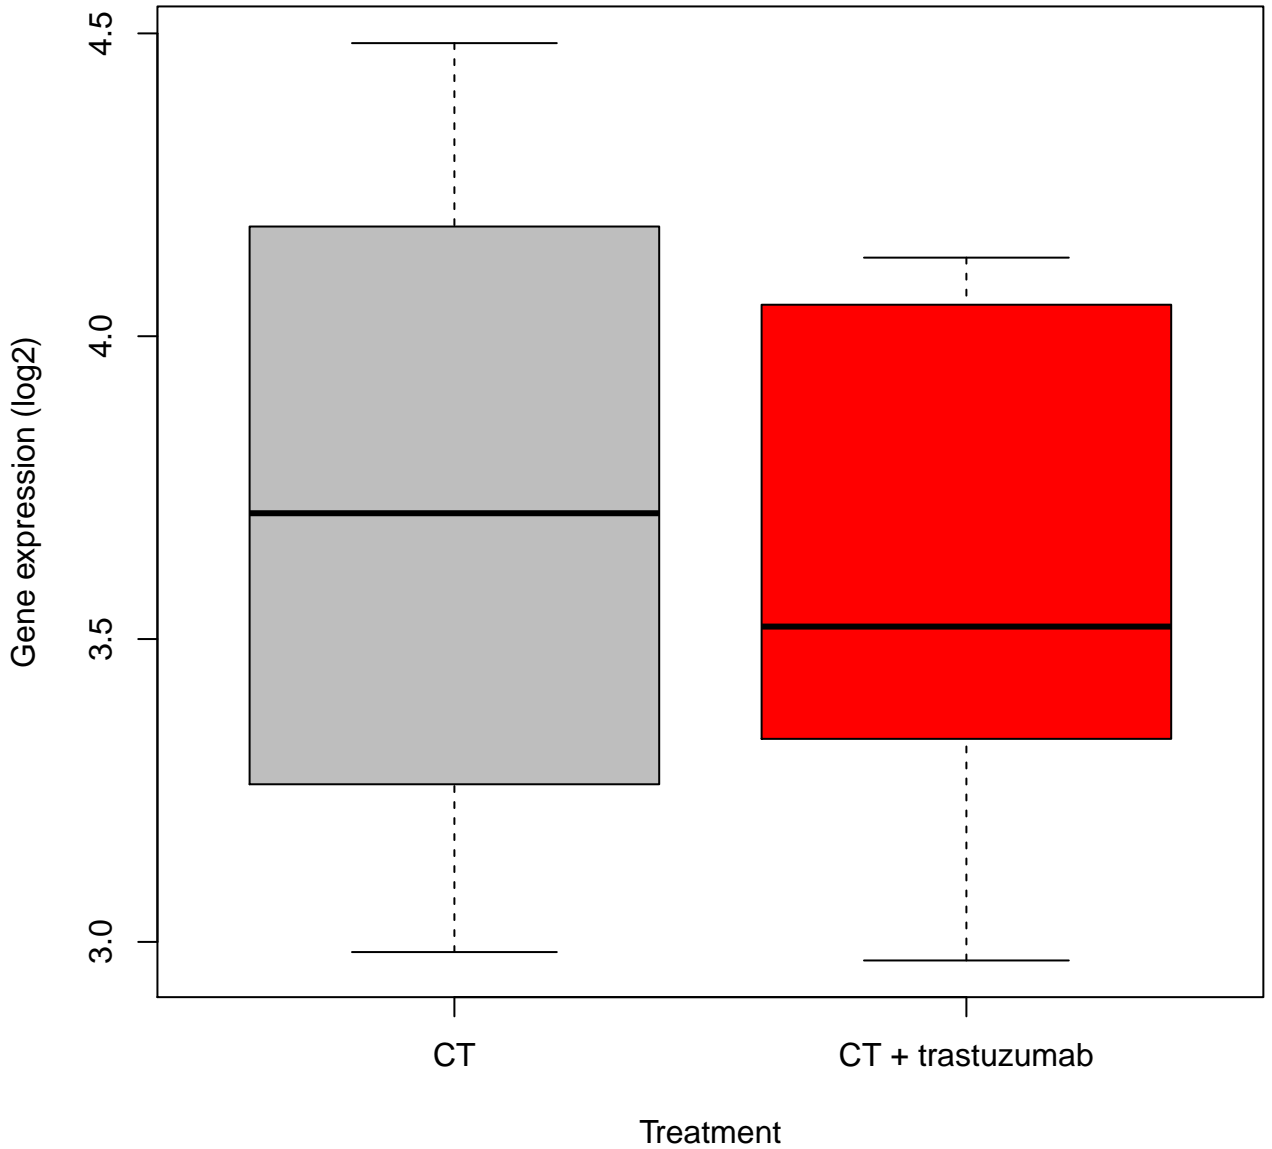

# KLK6

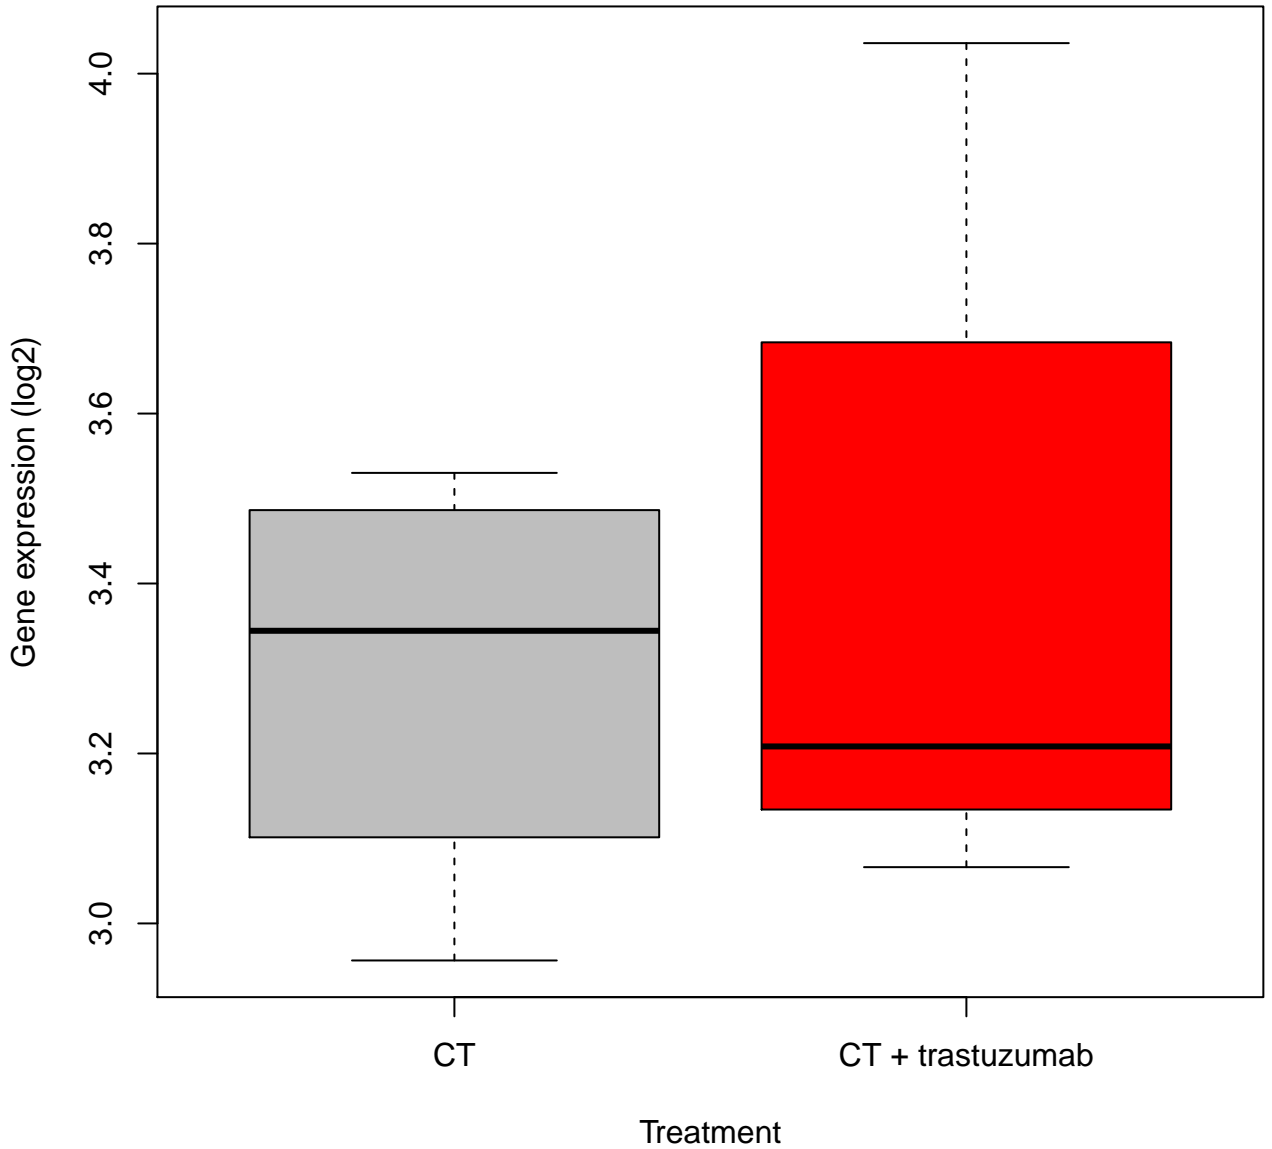

# KLK8

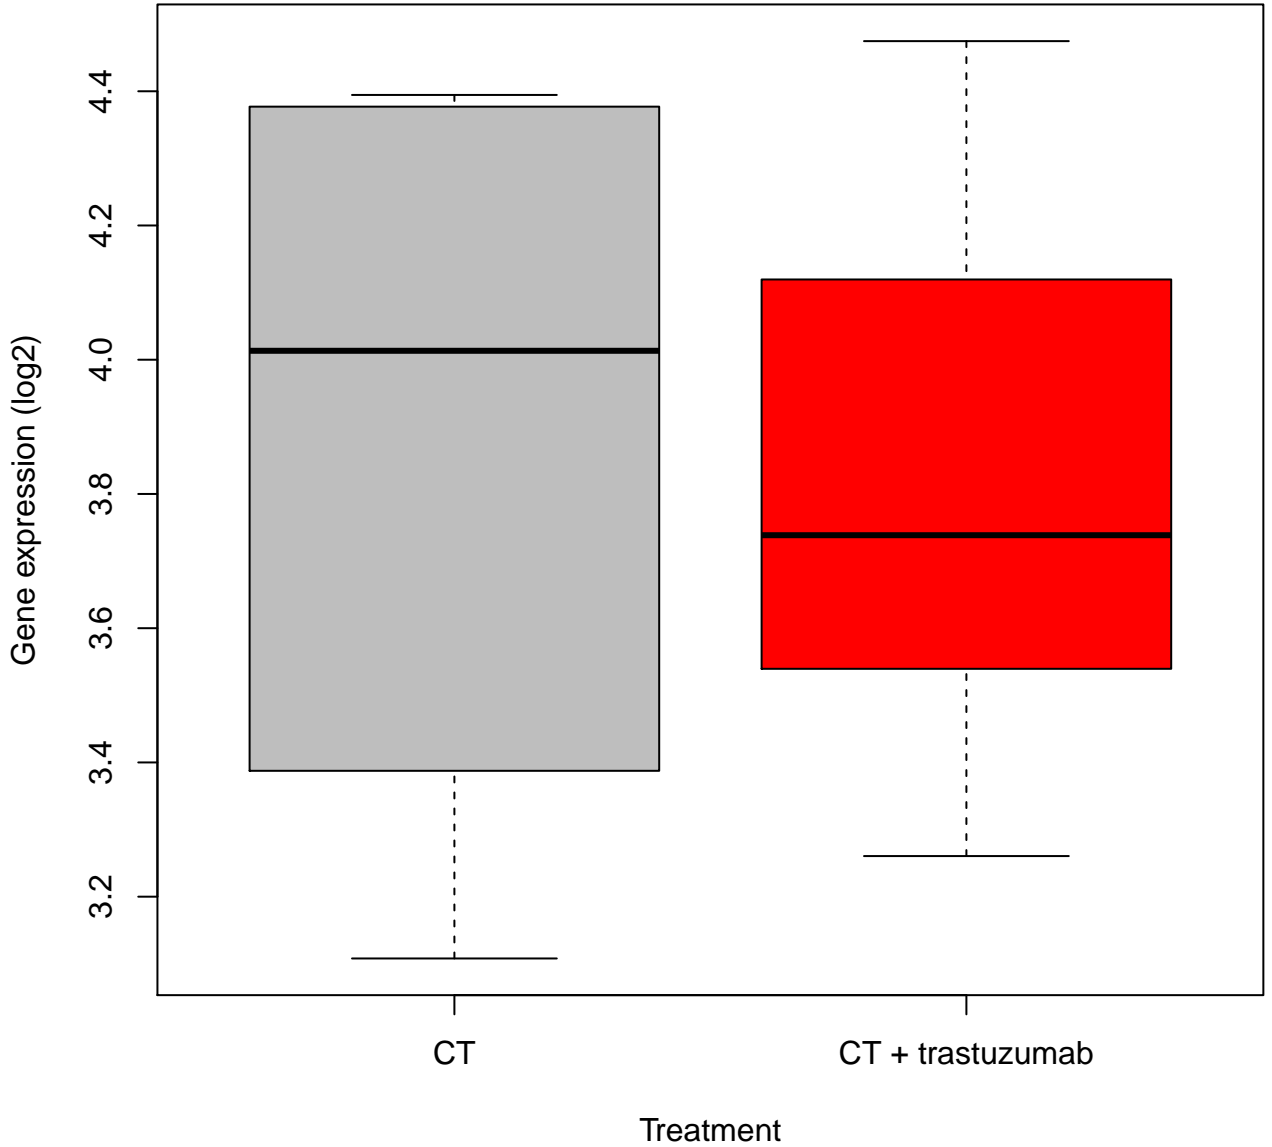



# KRT17

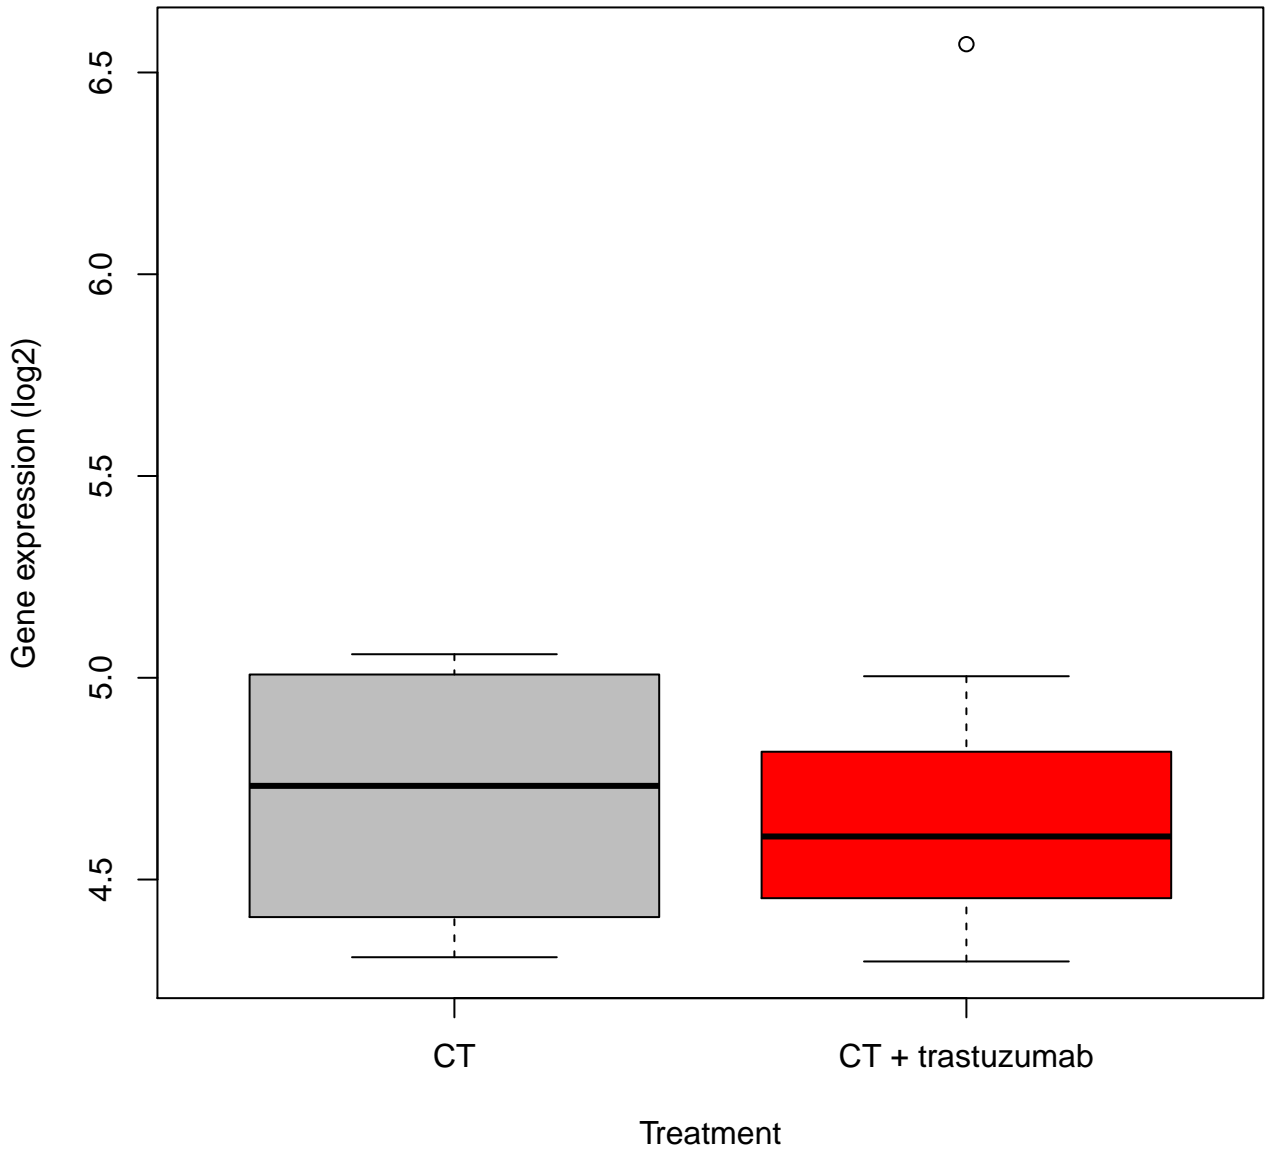

# KRT5

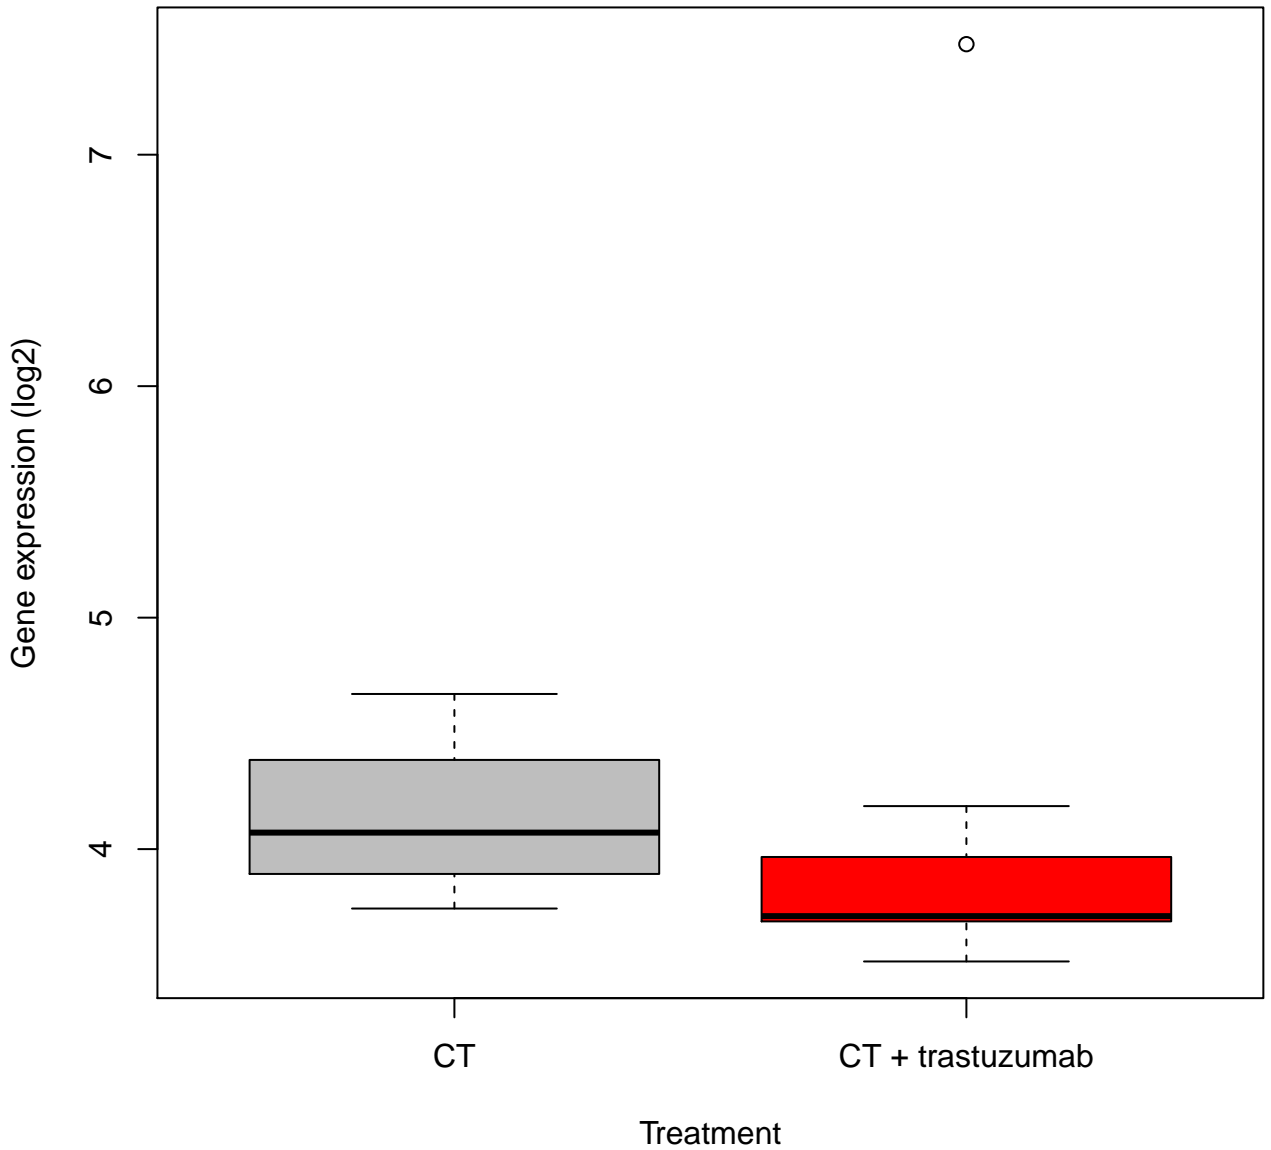

# KRT6A

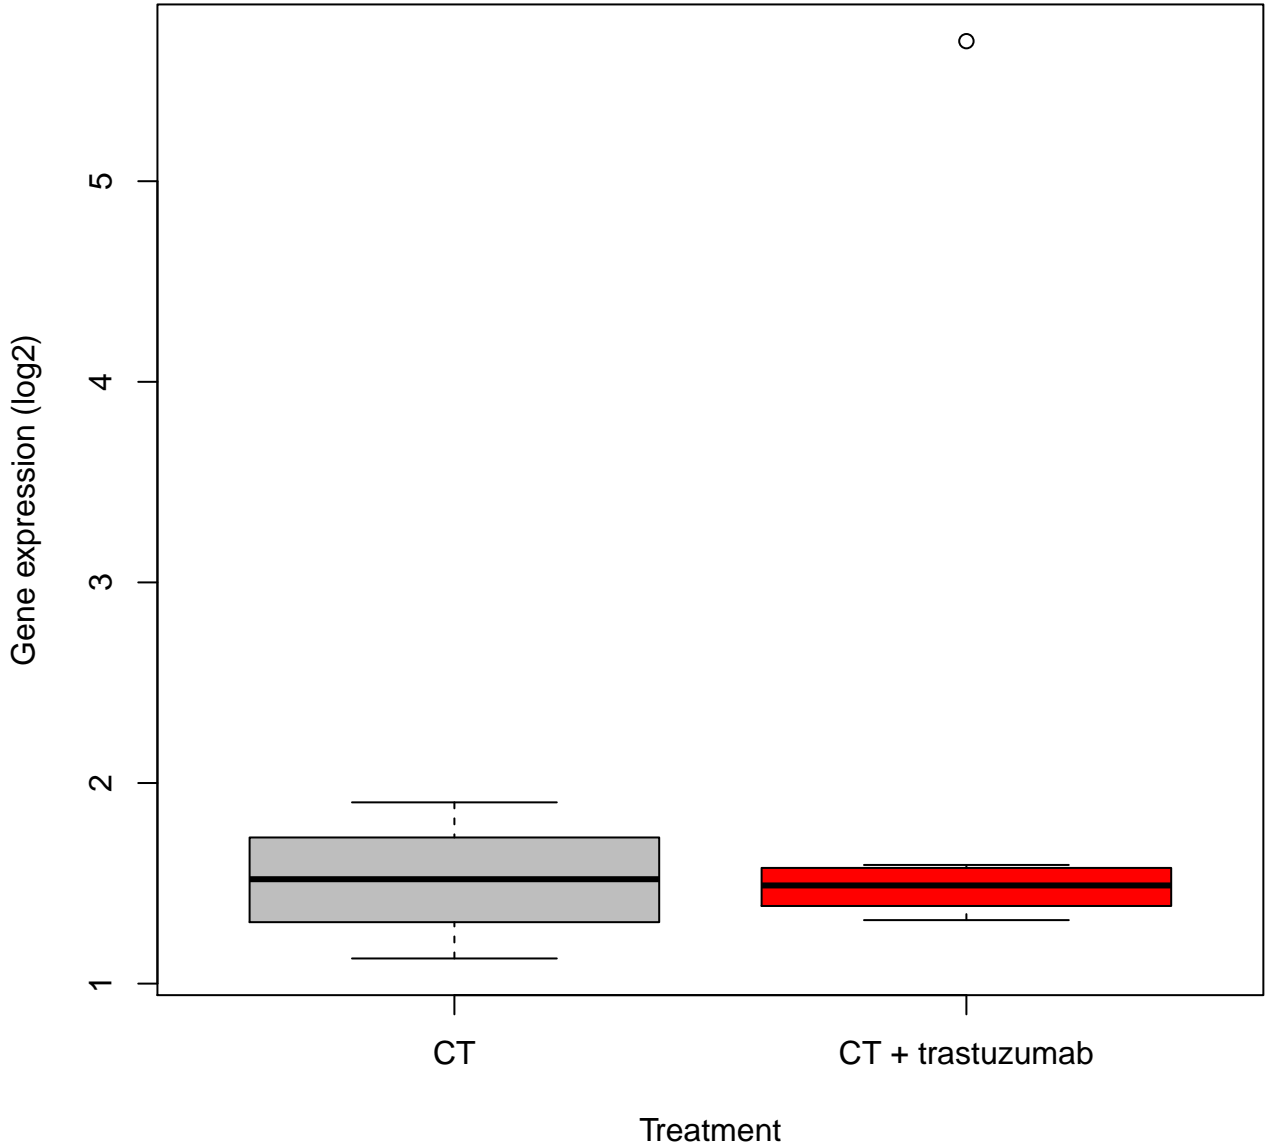

# KRT75

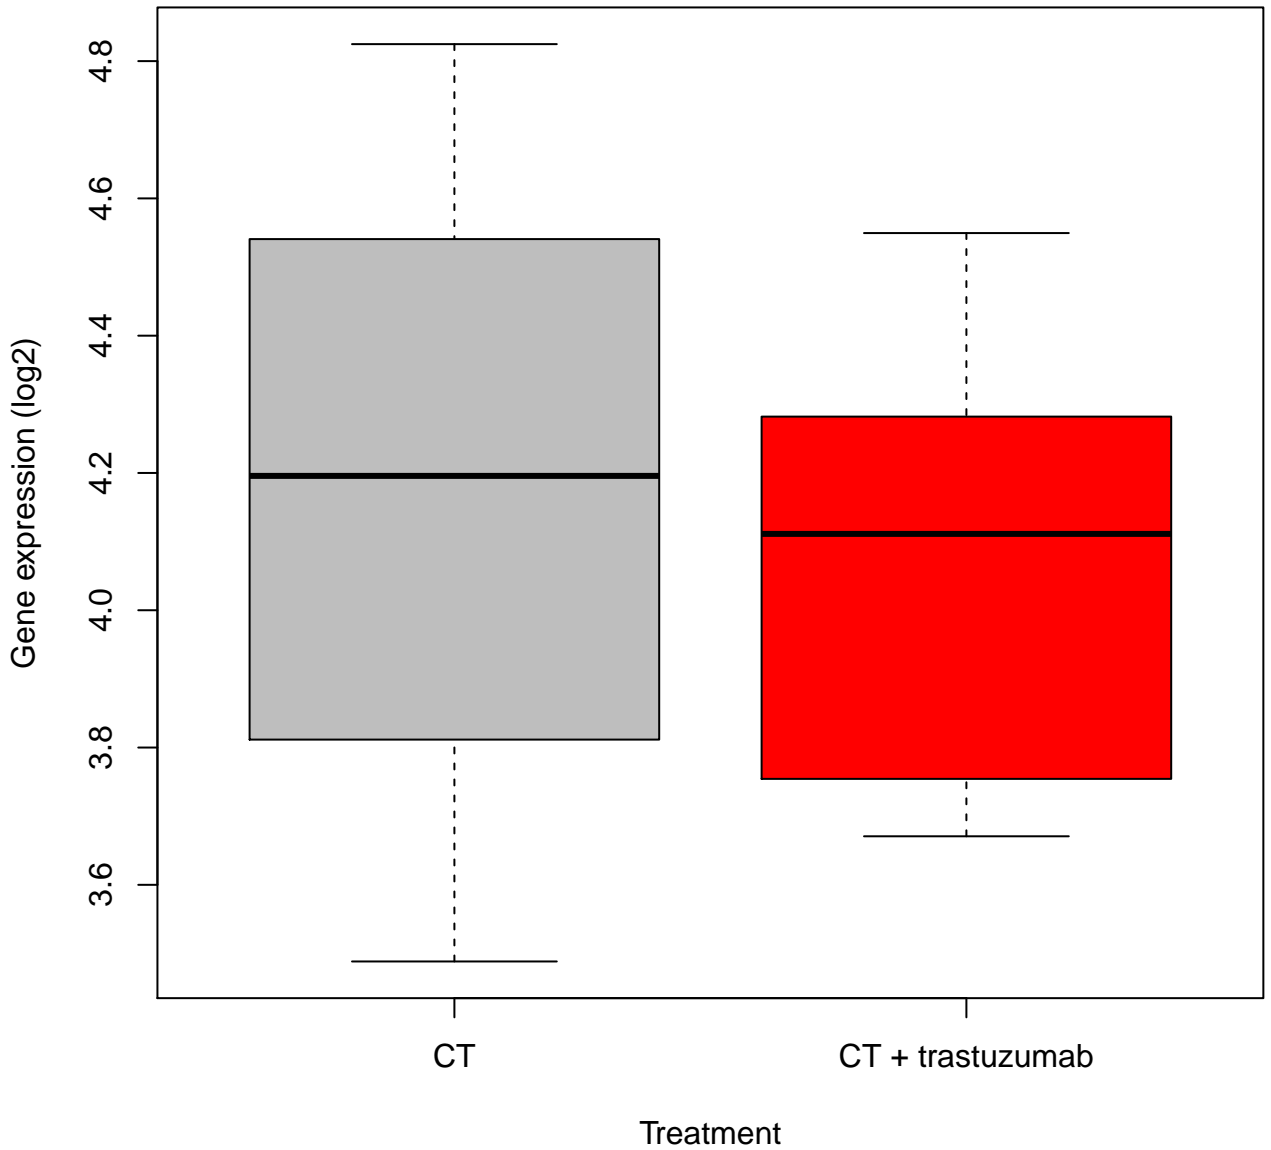

# KRT81

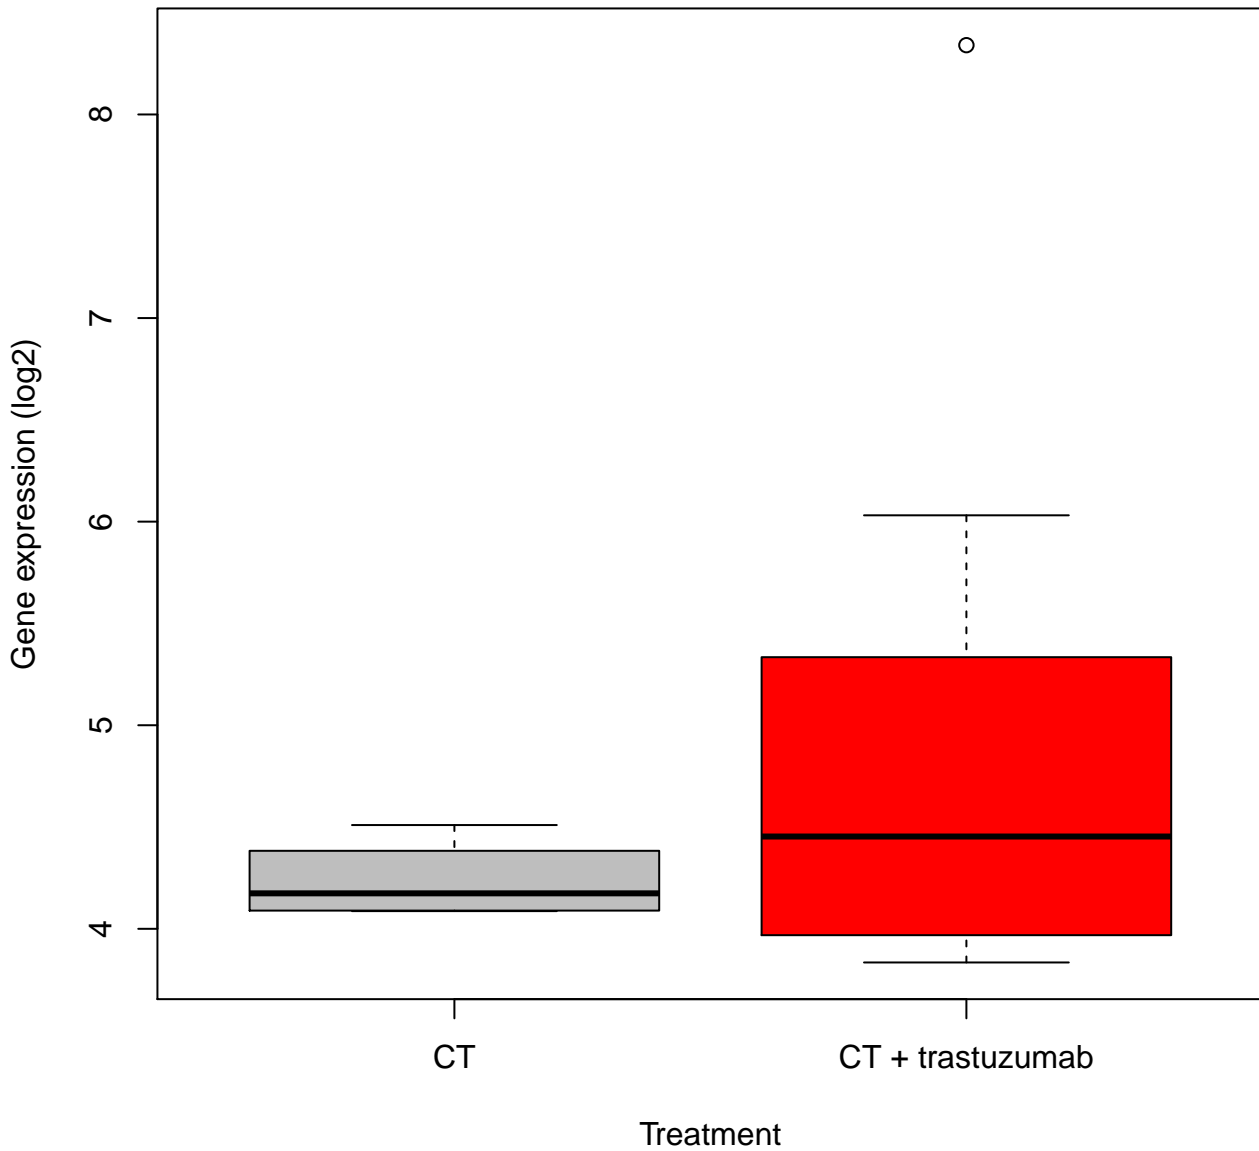

# LCN2

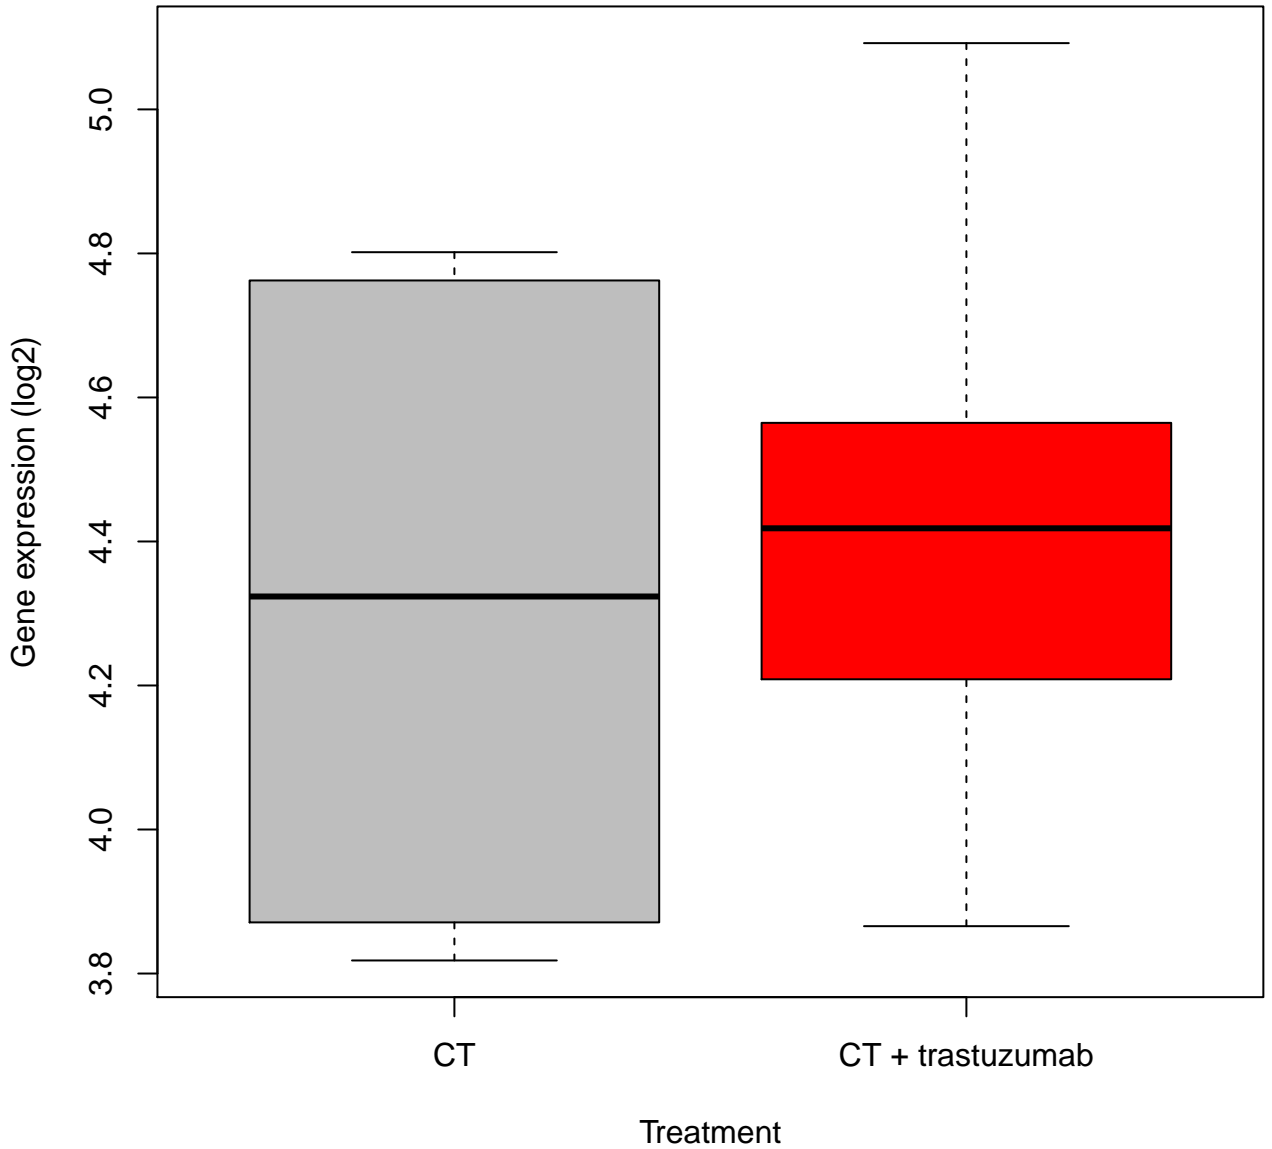

# LIF

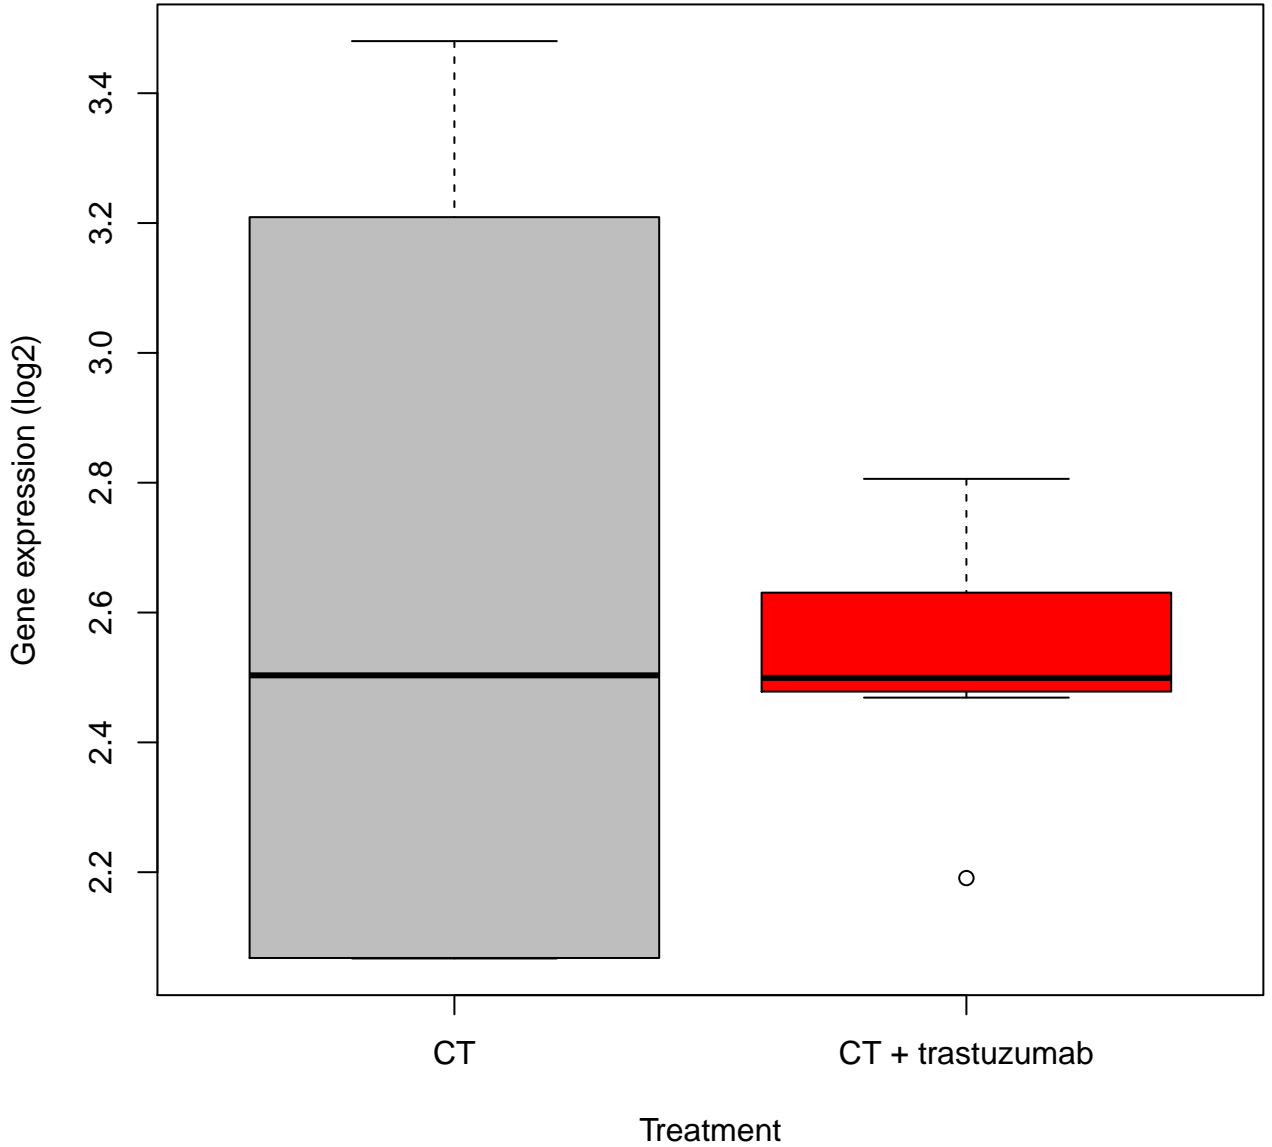

# LONRF2

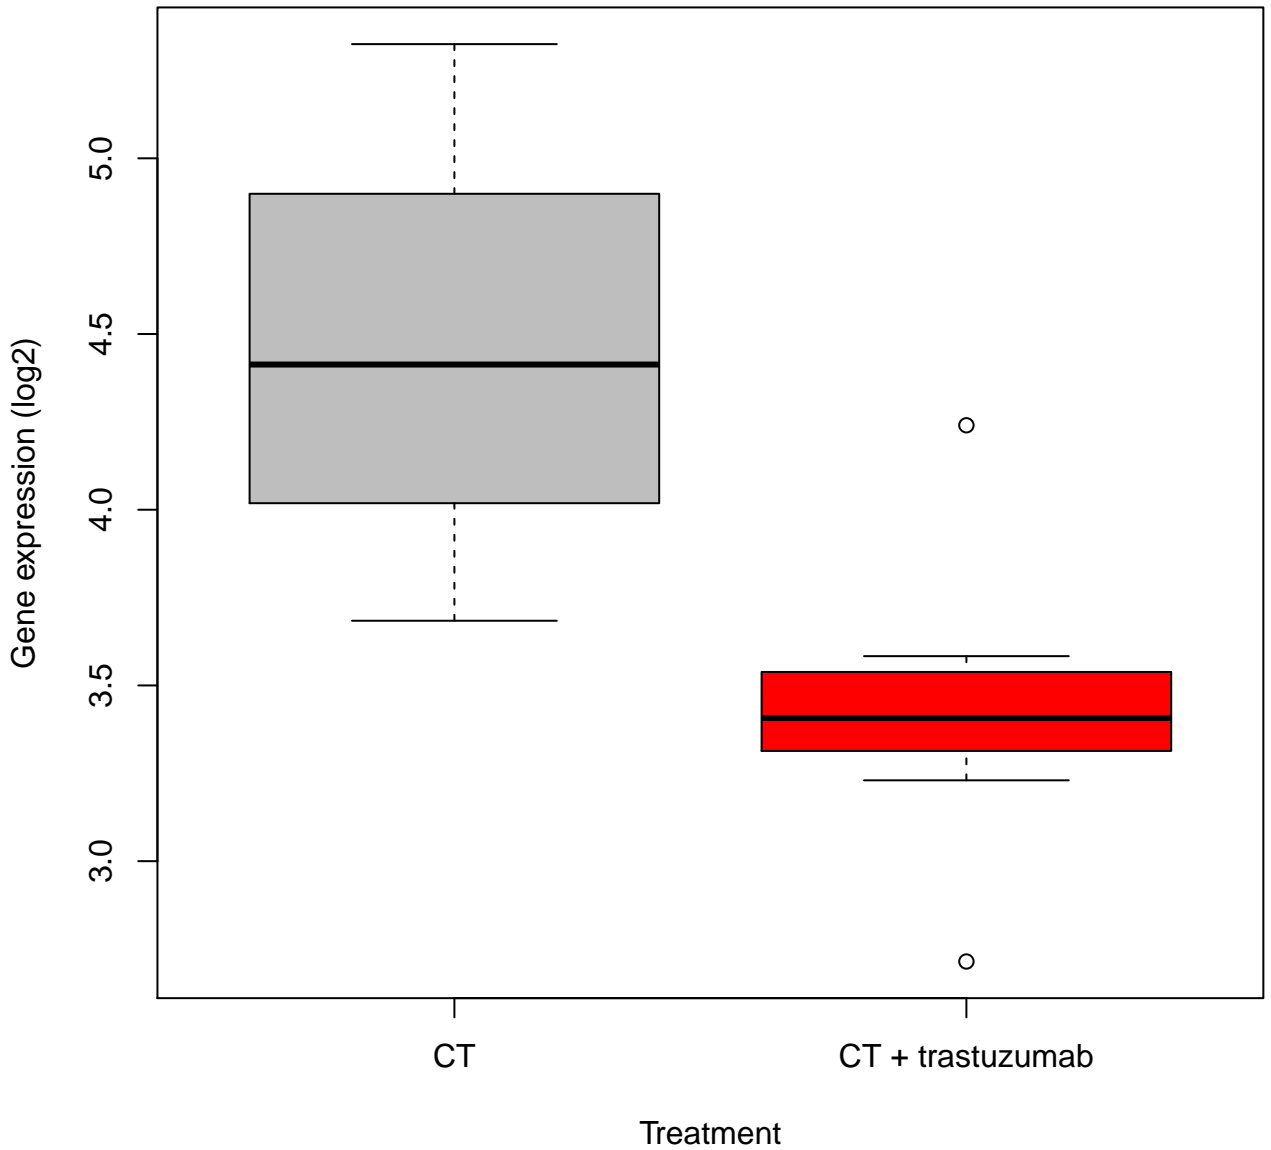



# MIR205HG

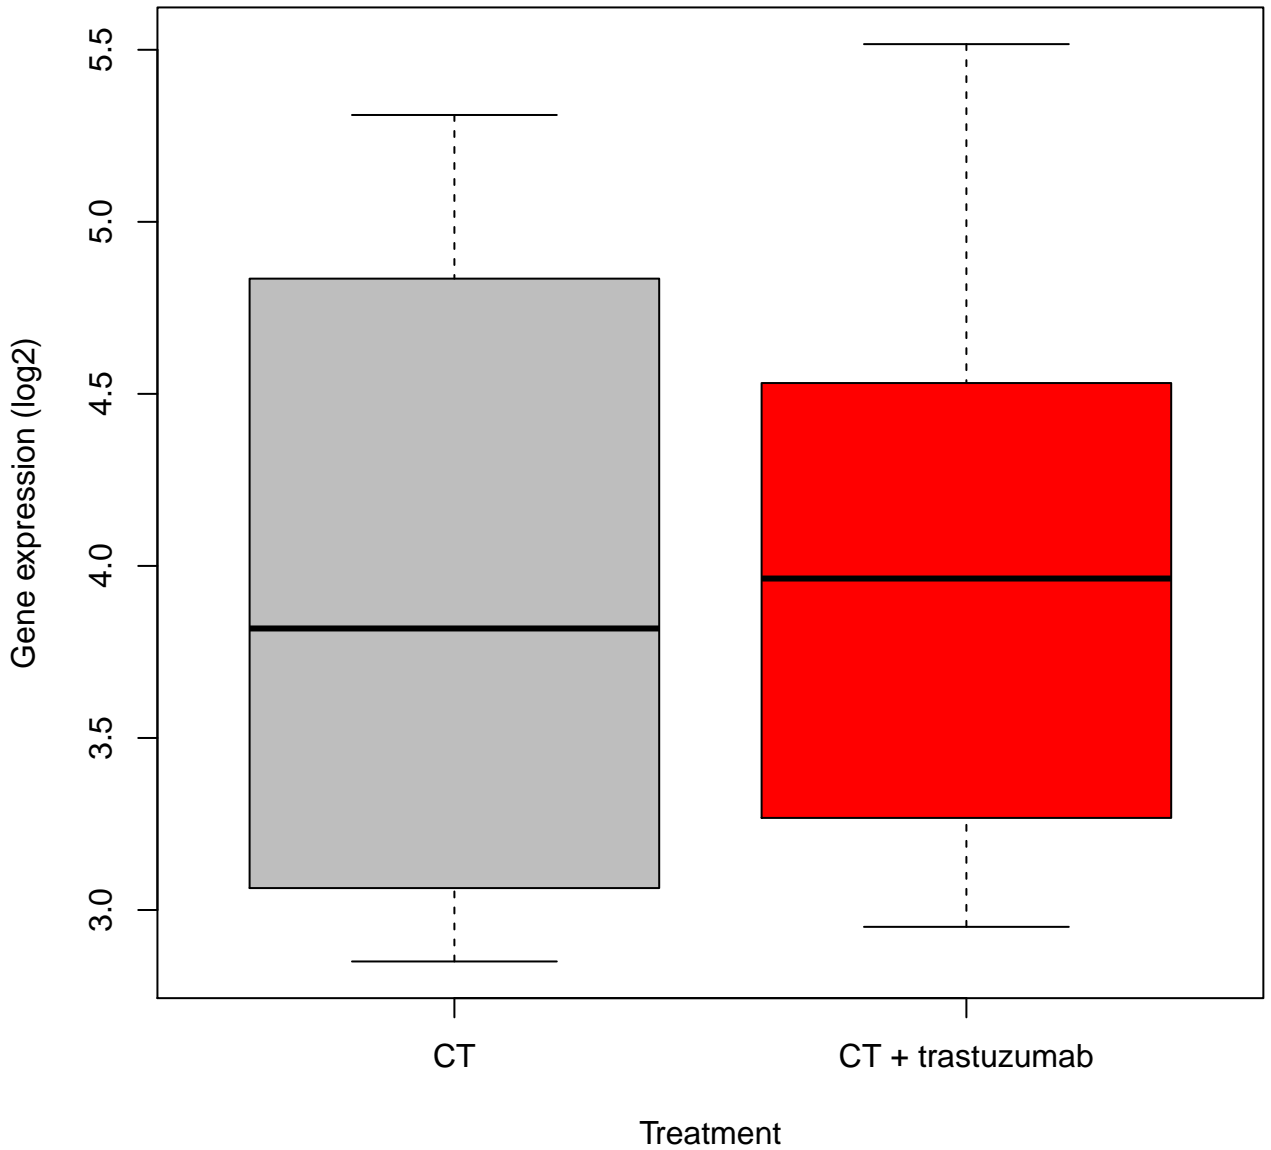

# MYEOV

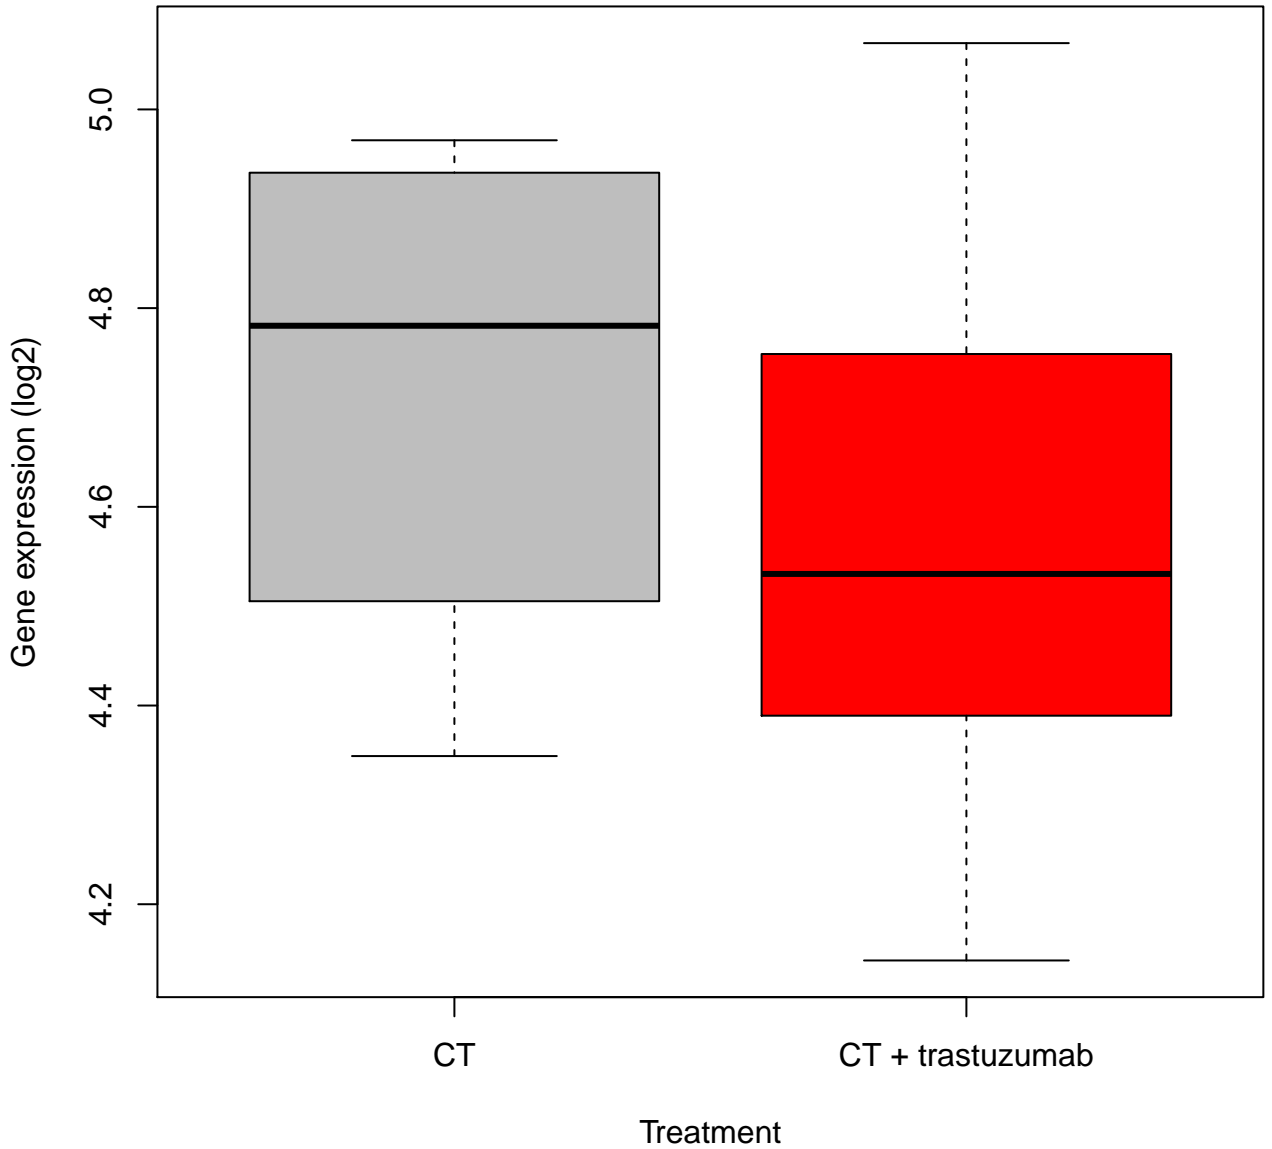

# NCAM2

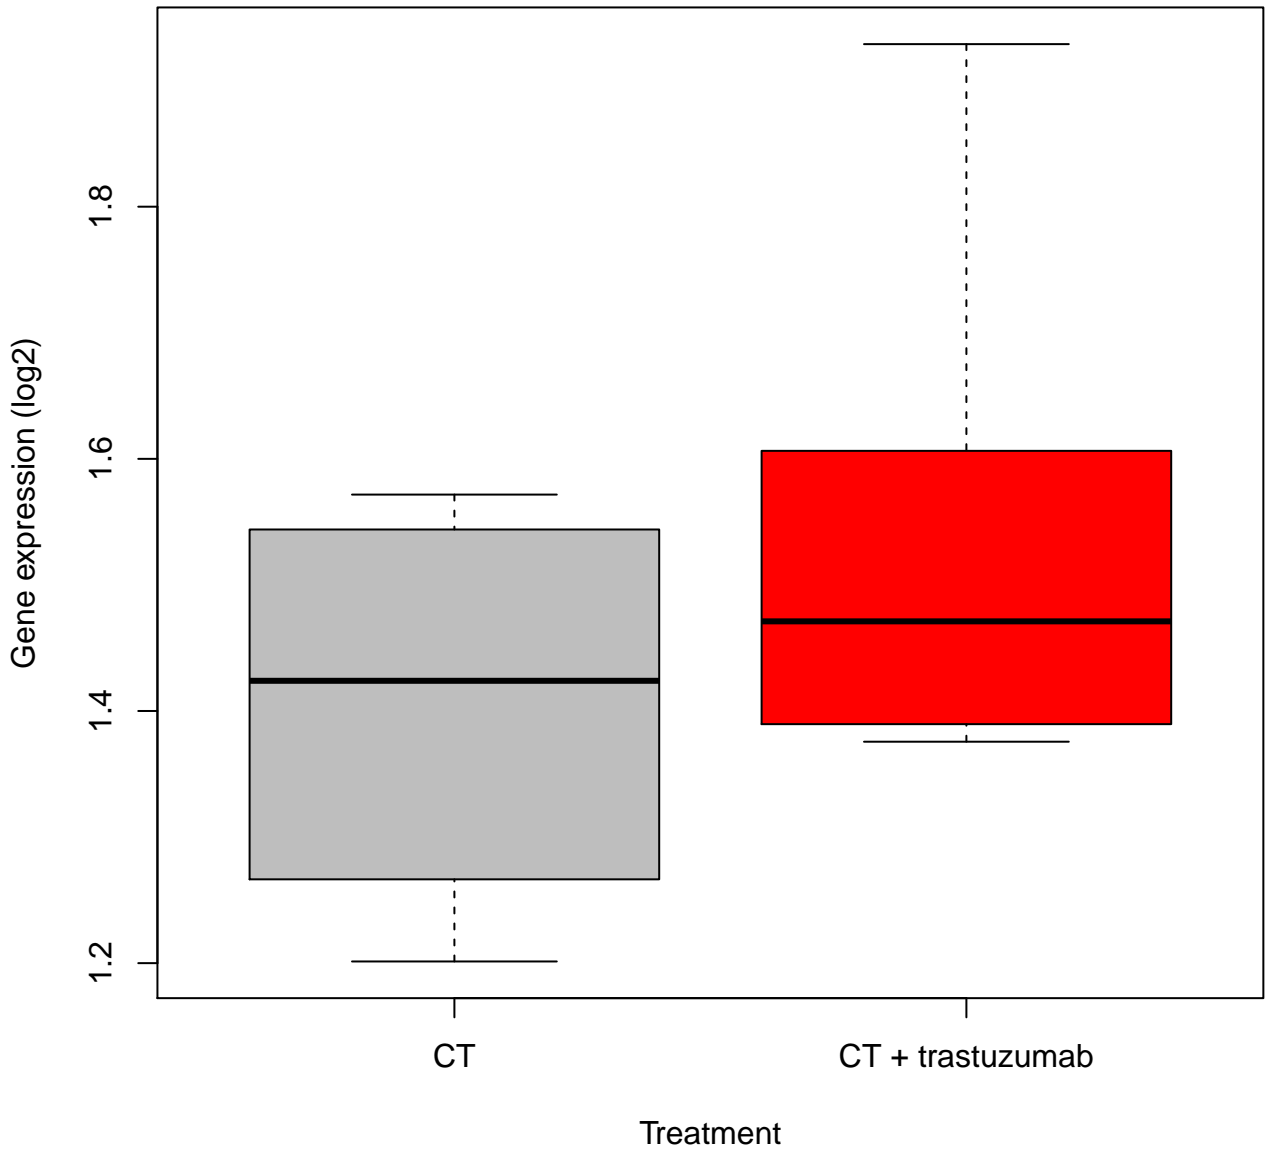

# NRCAM

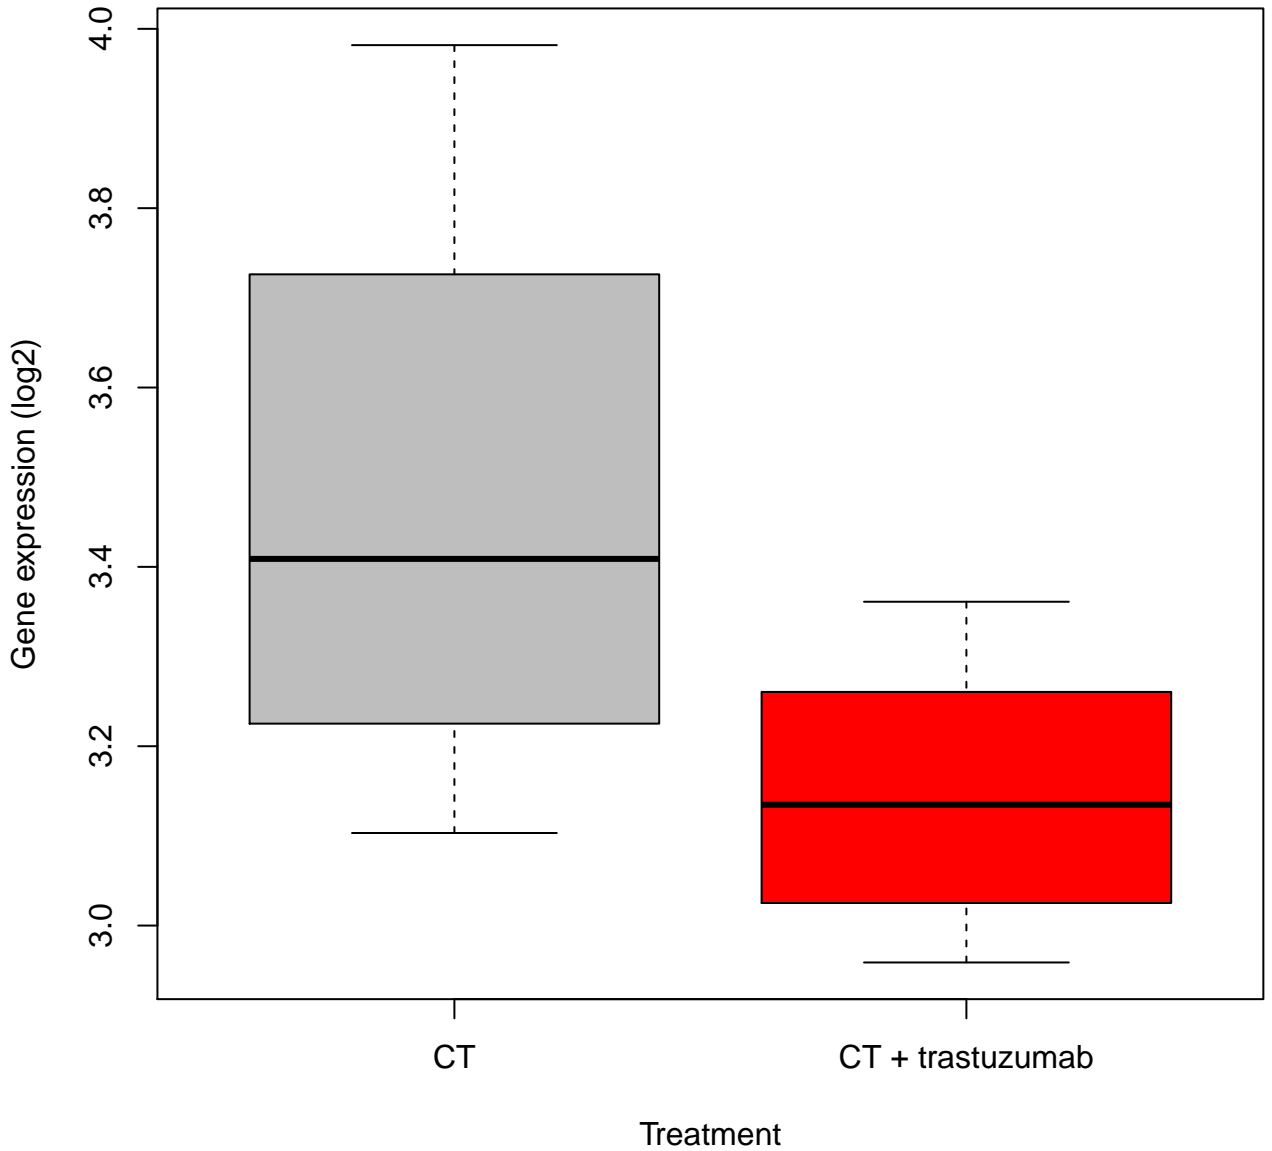

# PGR

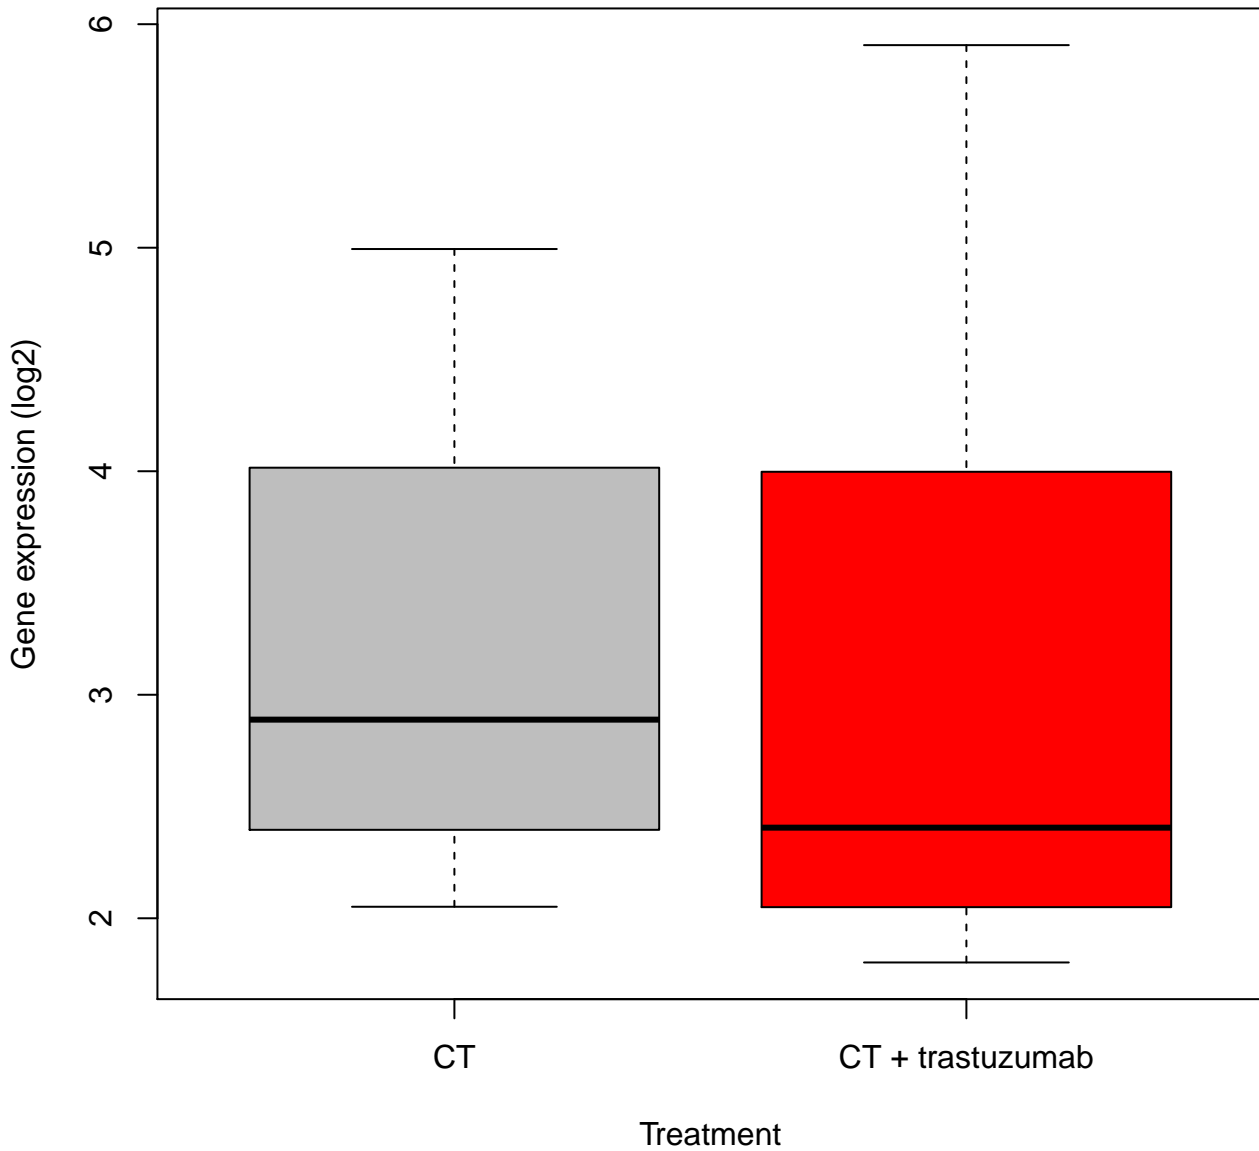

# PTGS2

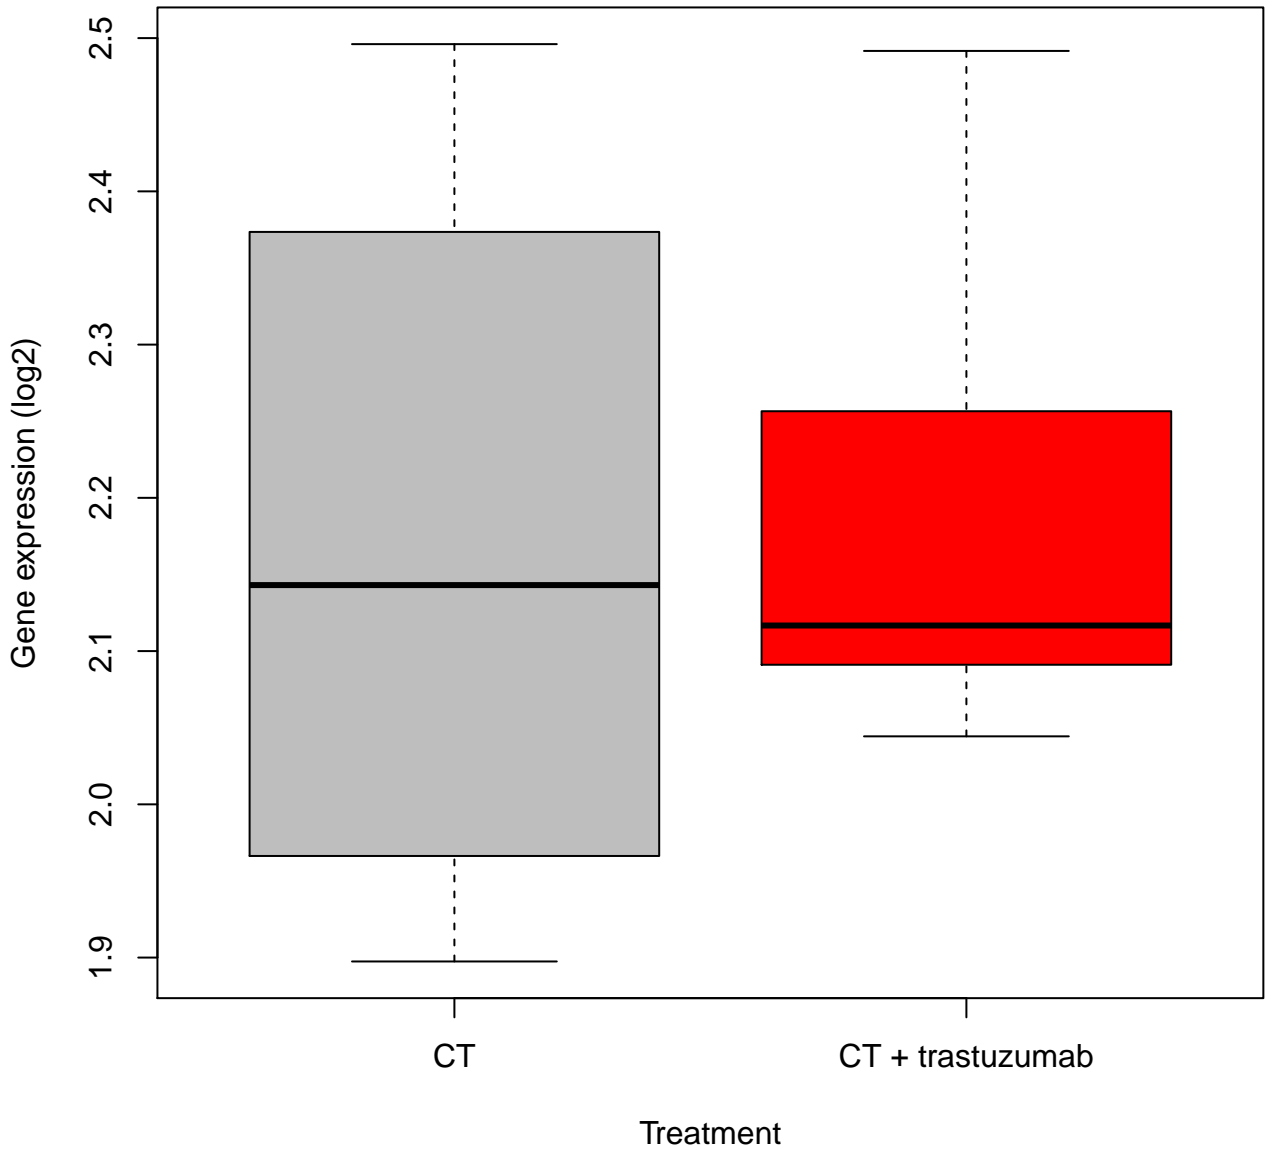

# PTRF

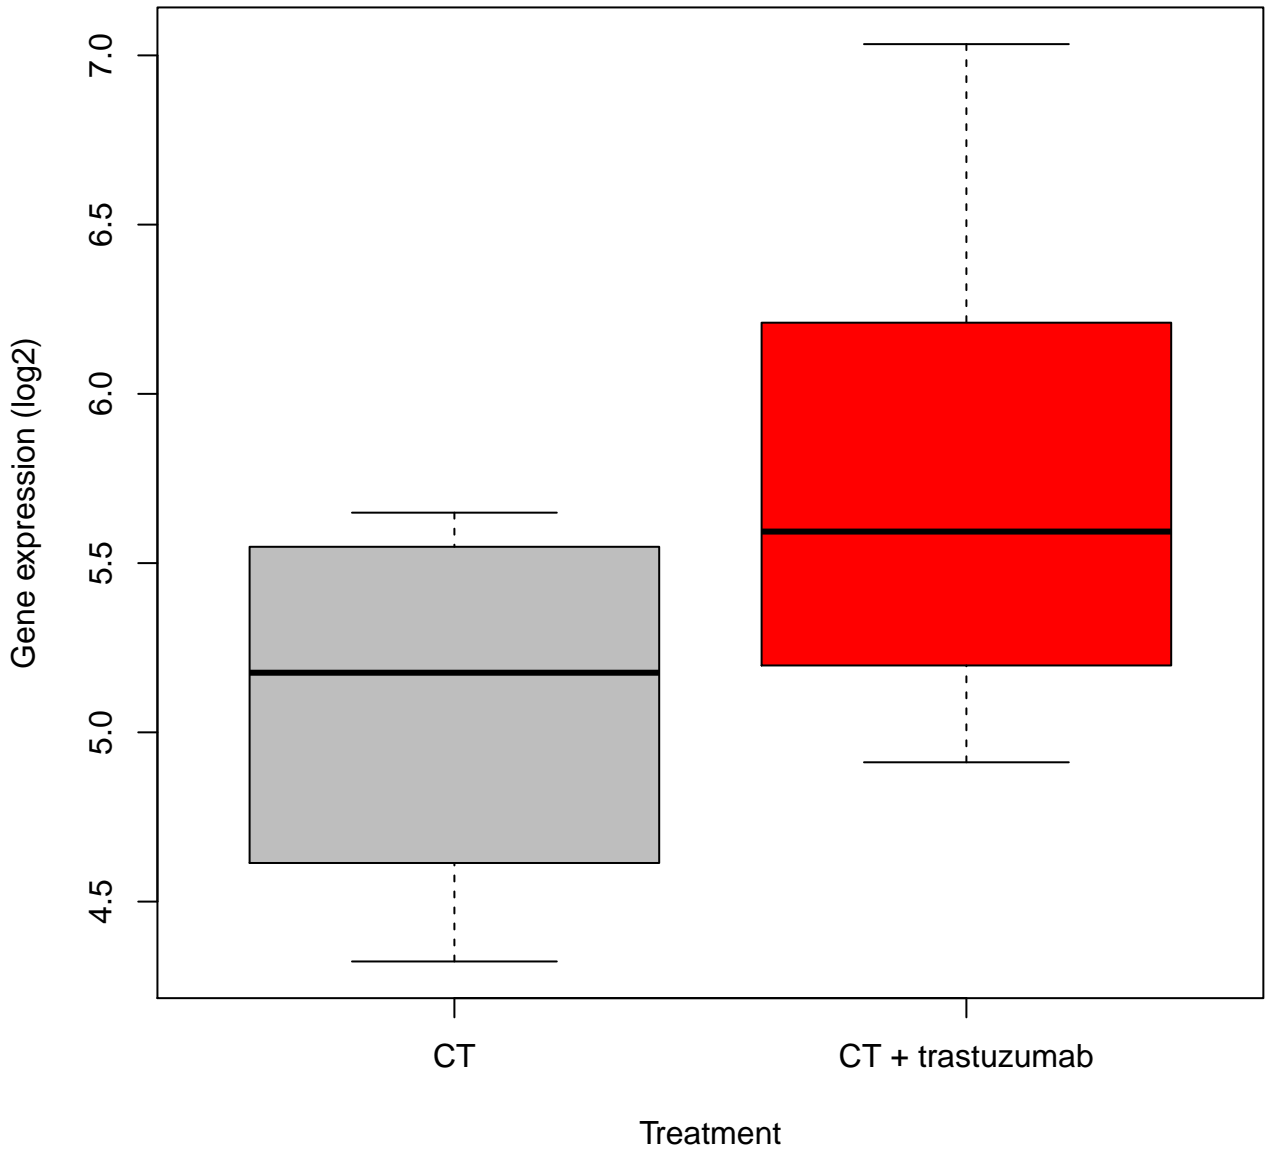

# RGL3

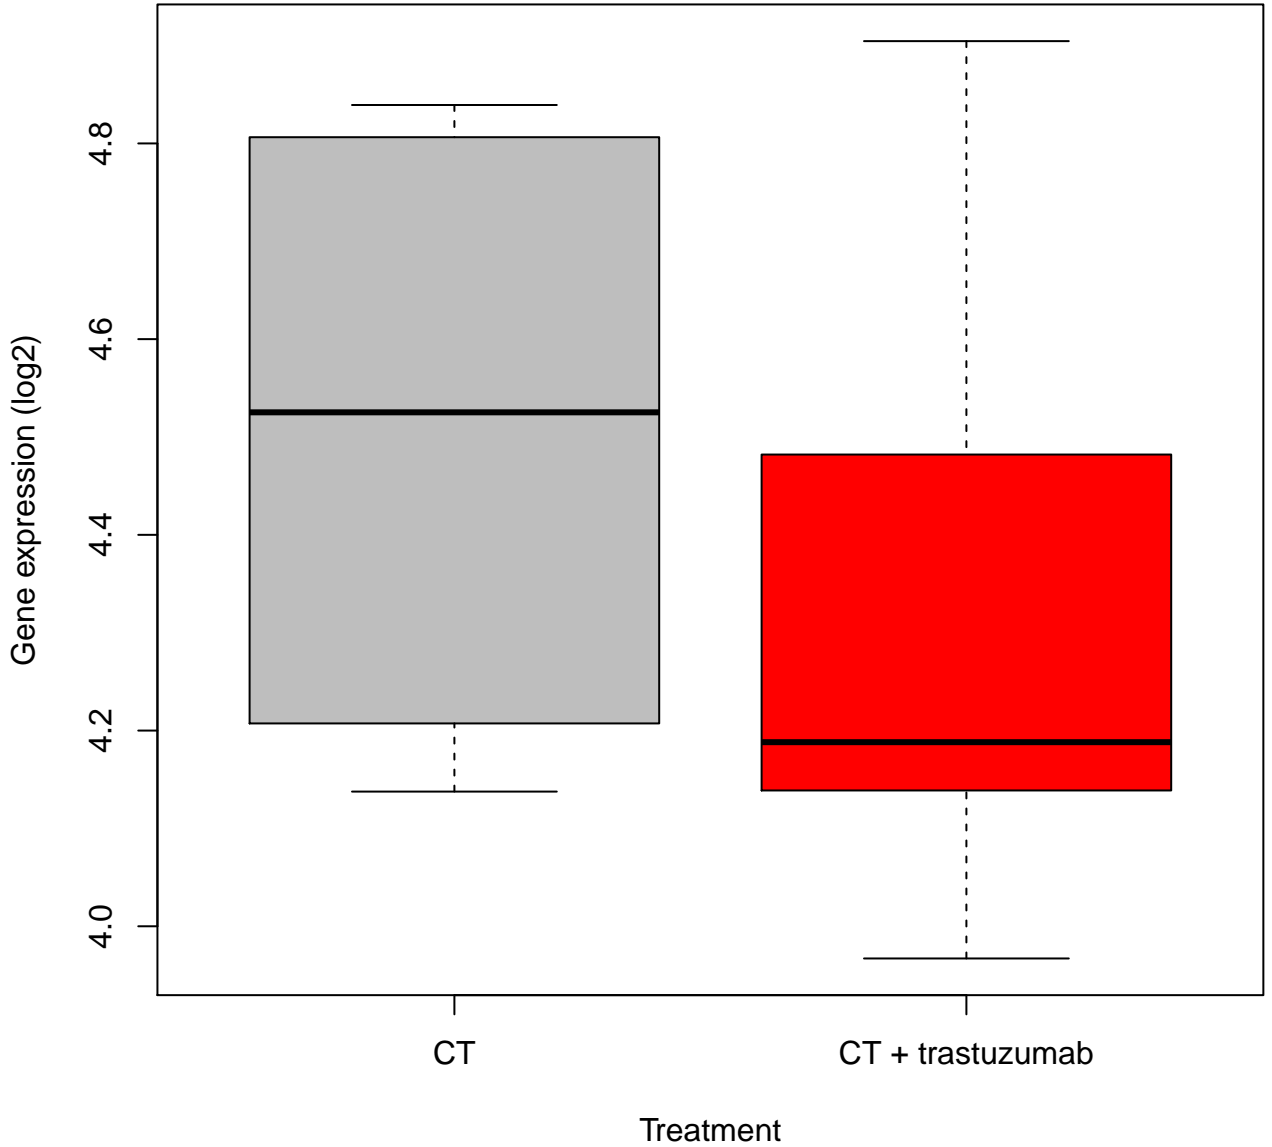



# S100A9

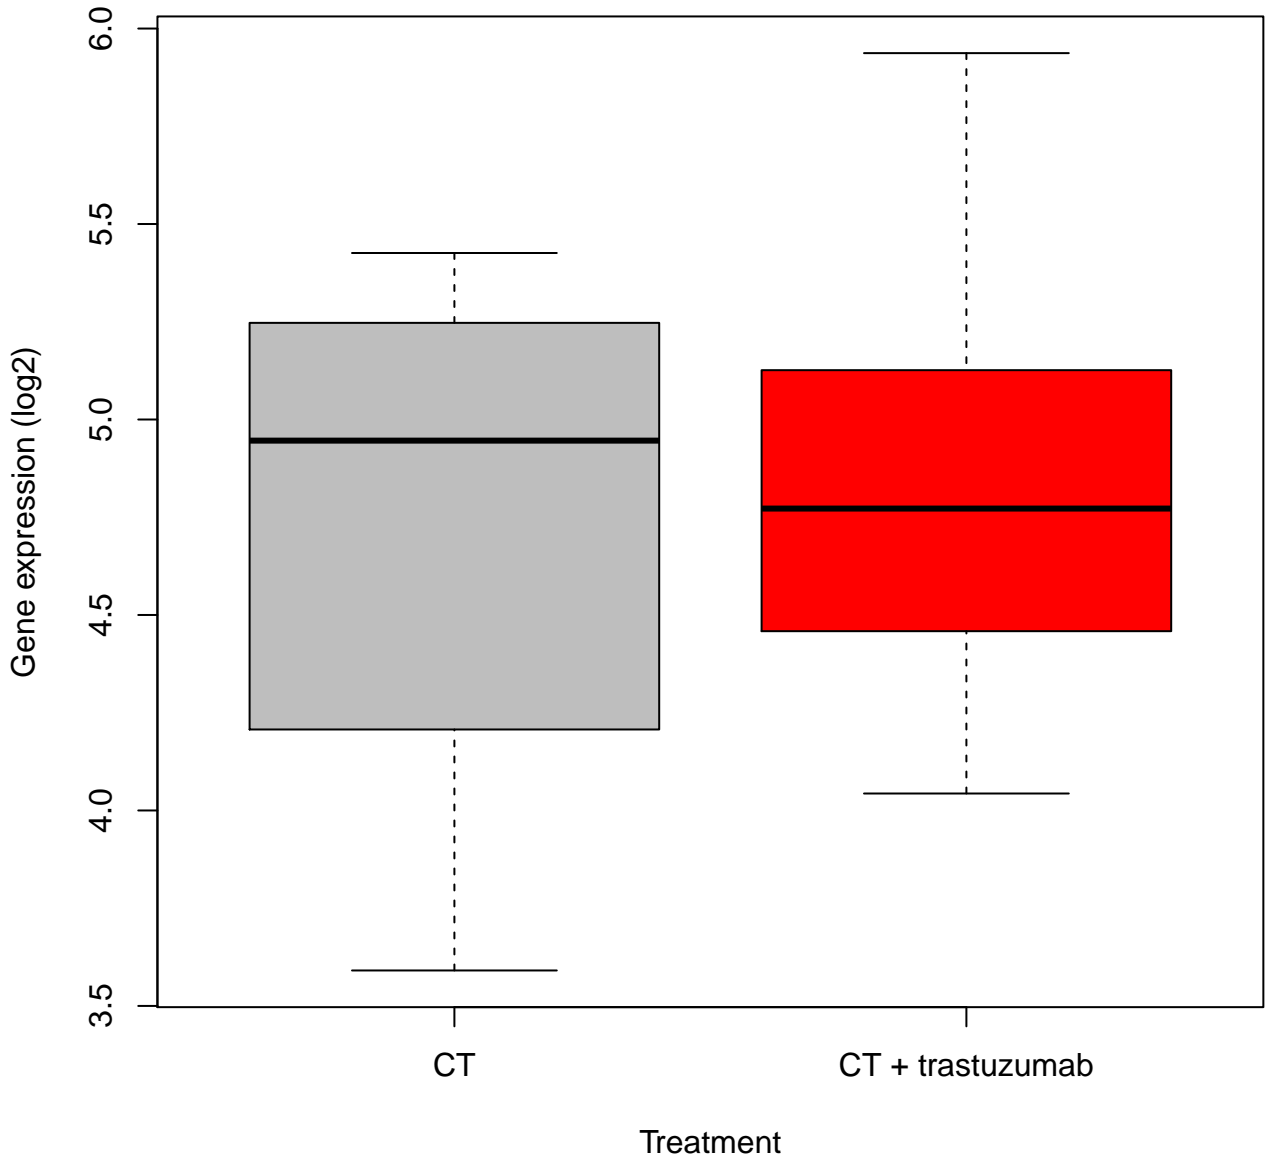

# STXBP2

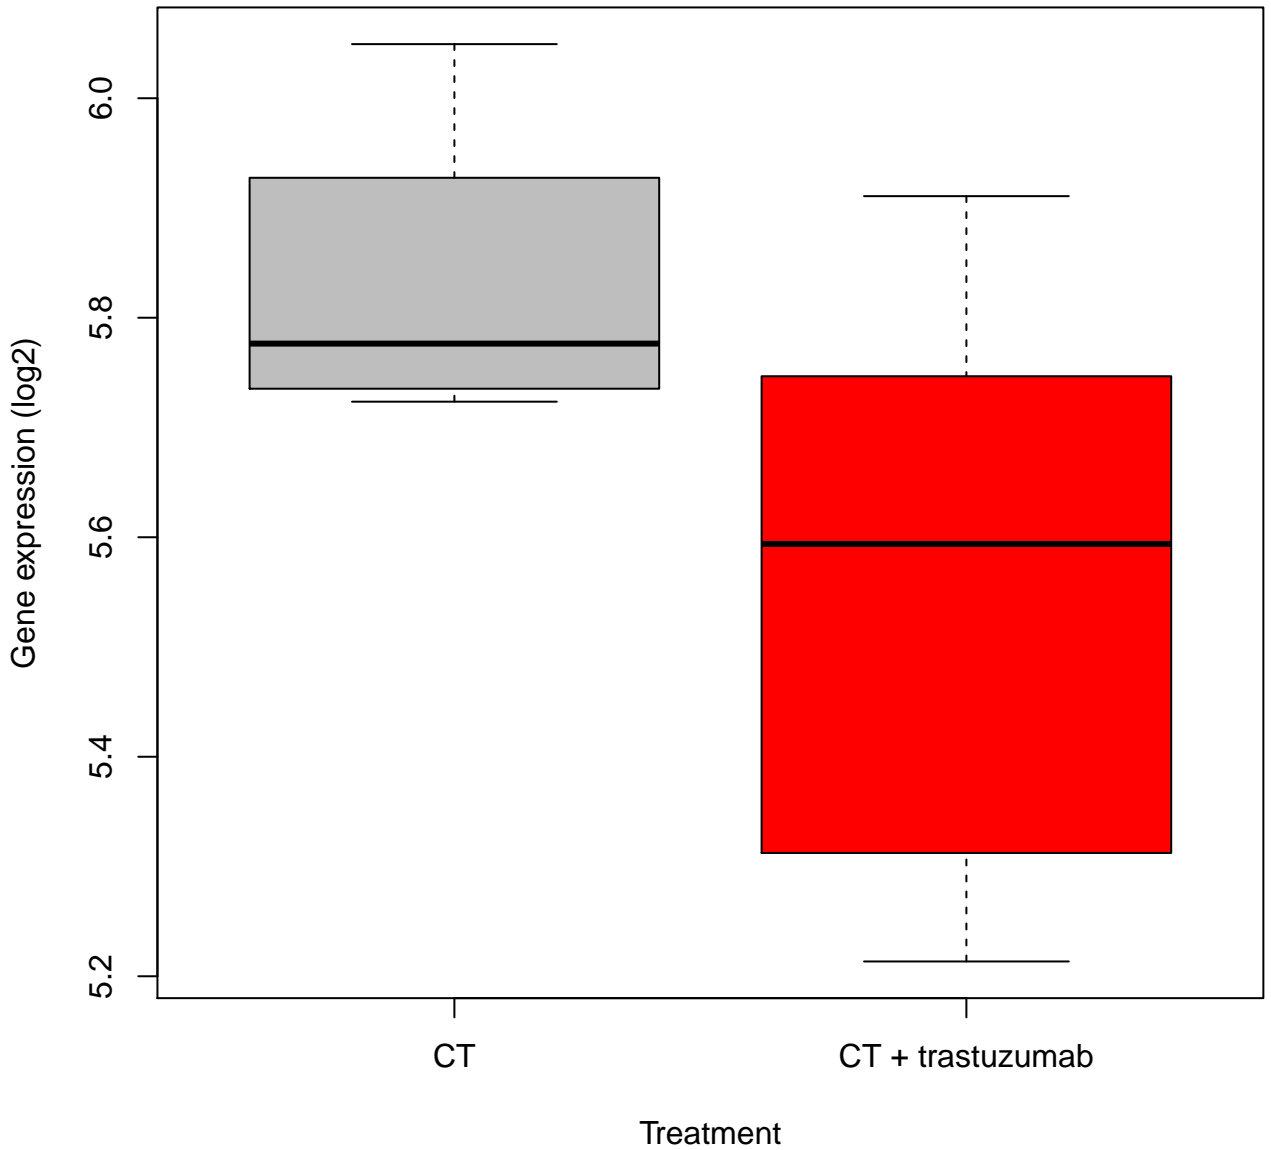

# TFF1

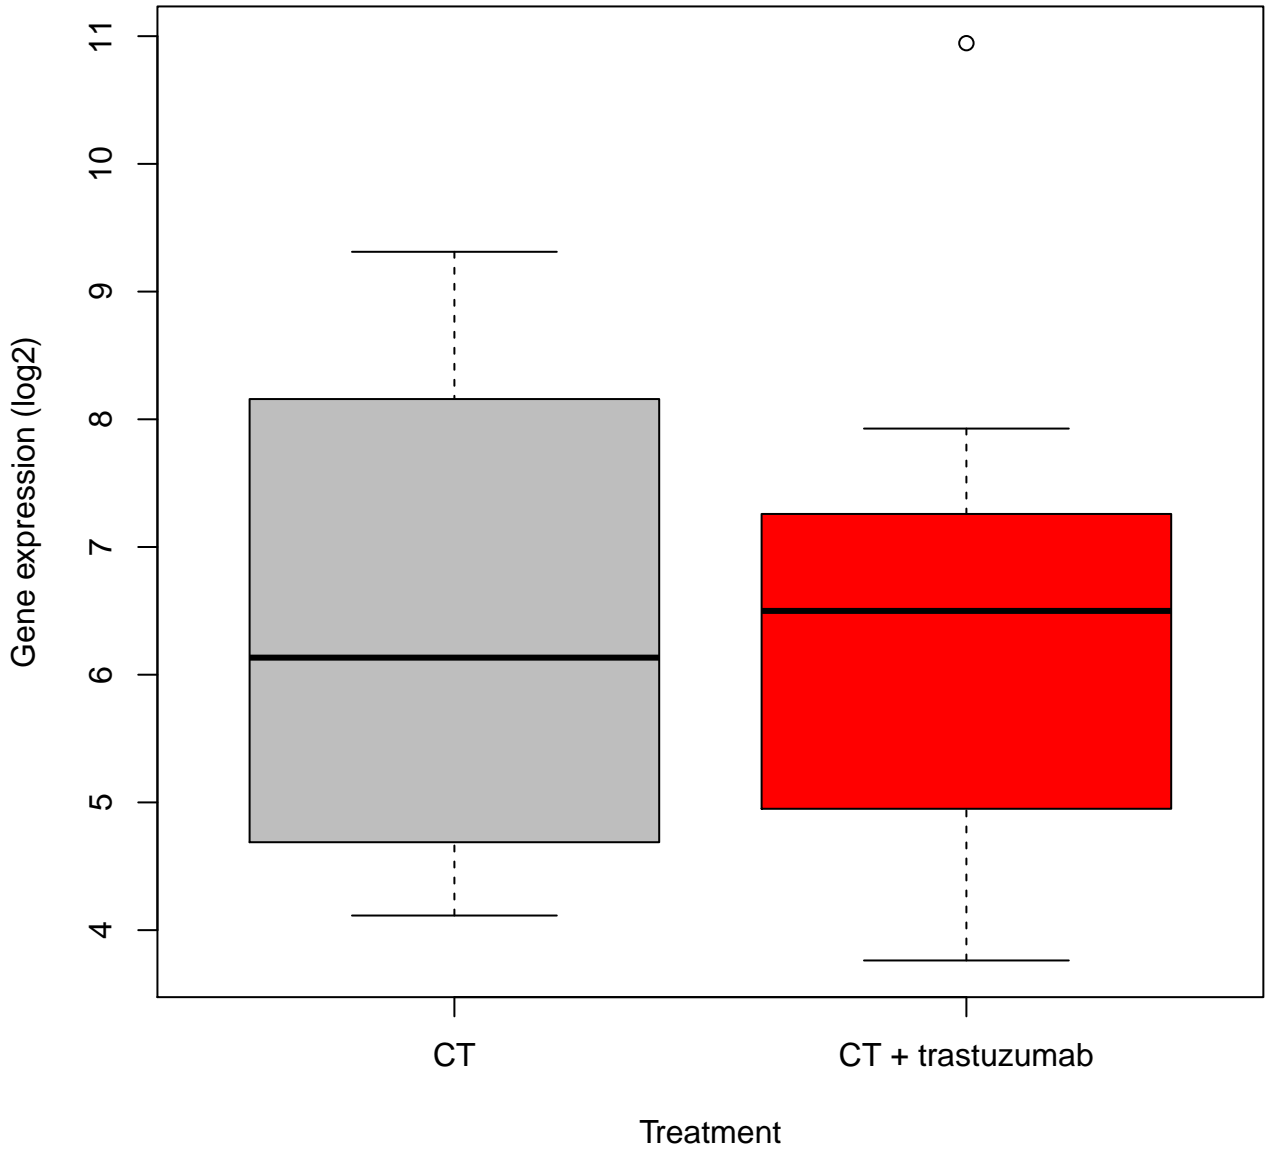

# TFF3

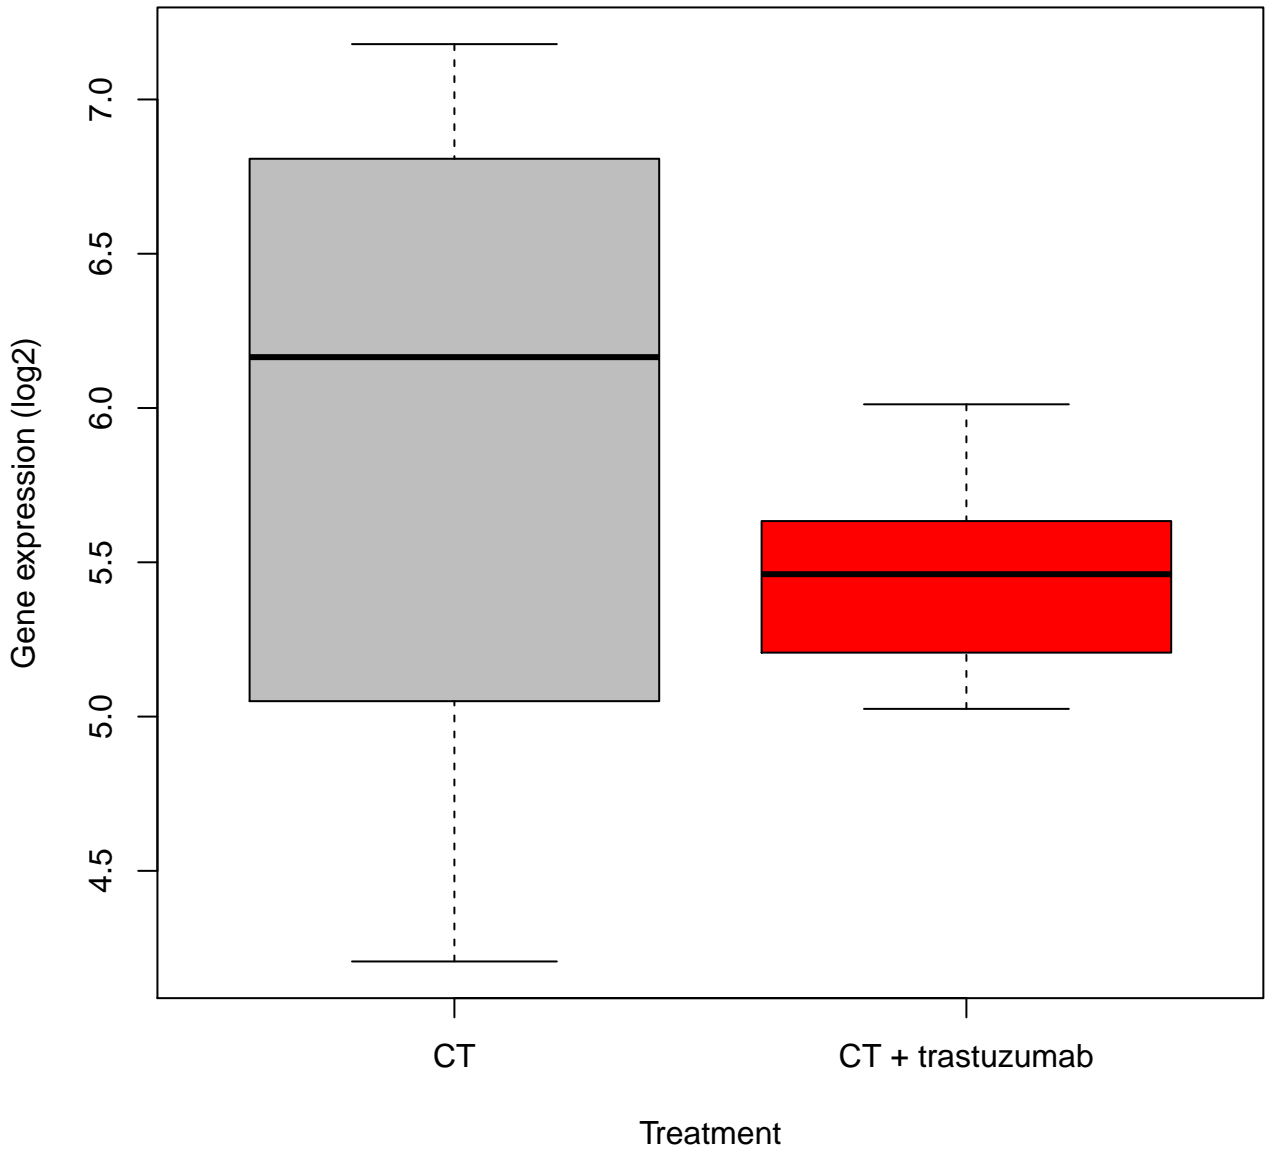

# TGM2

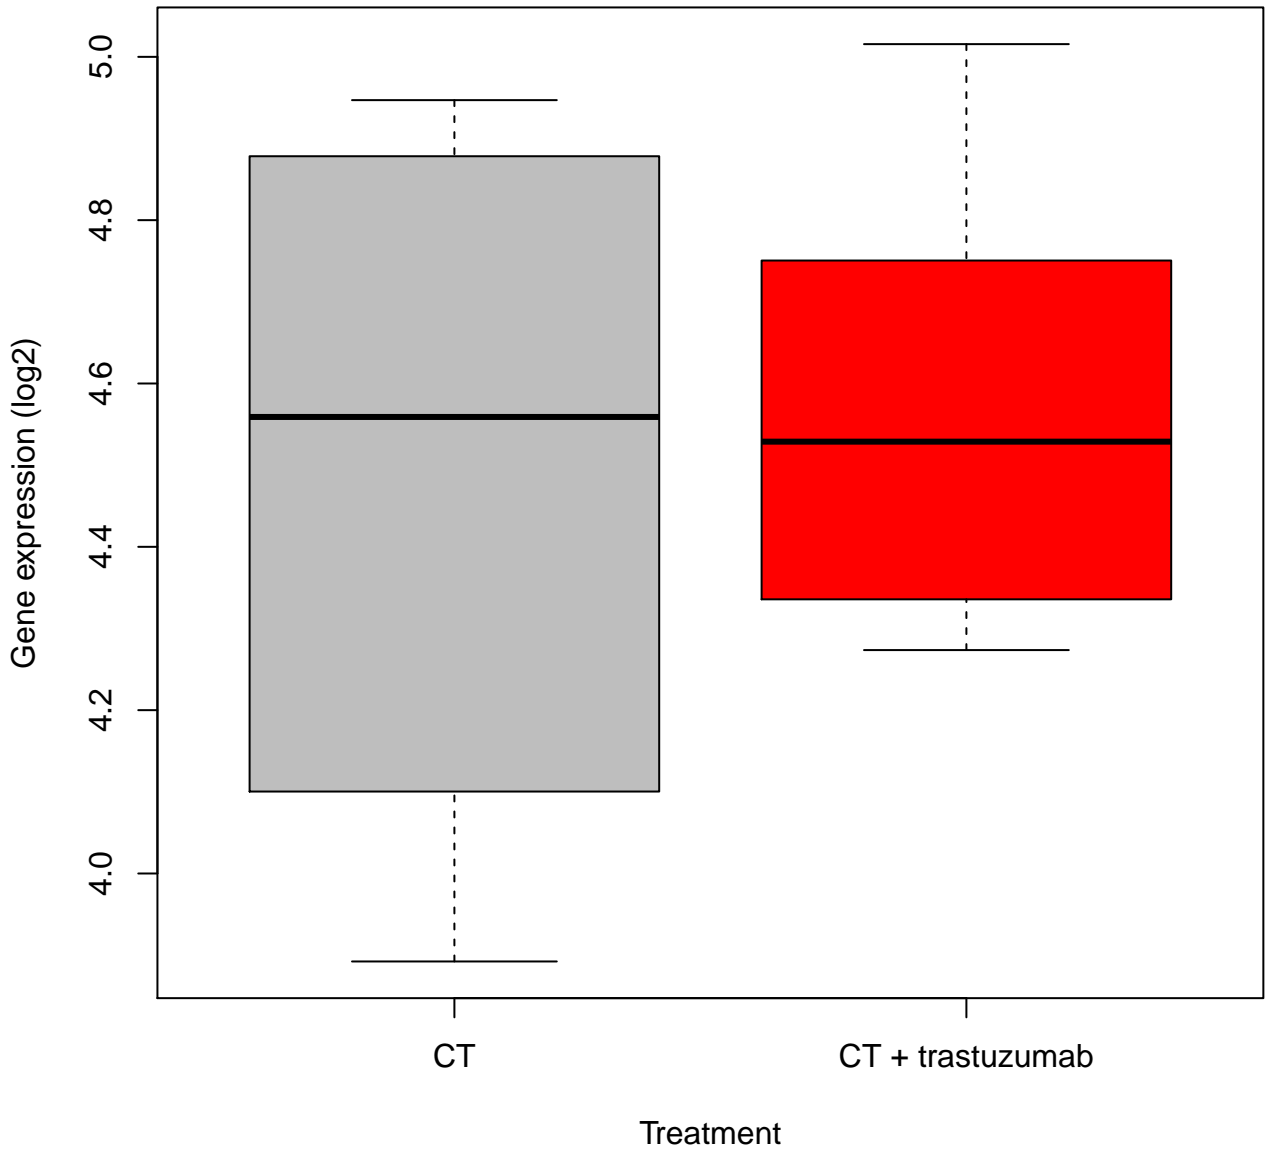

# TINAGL1

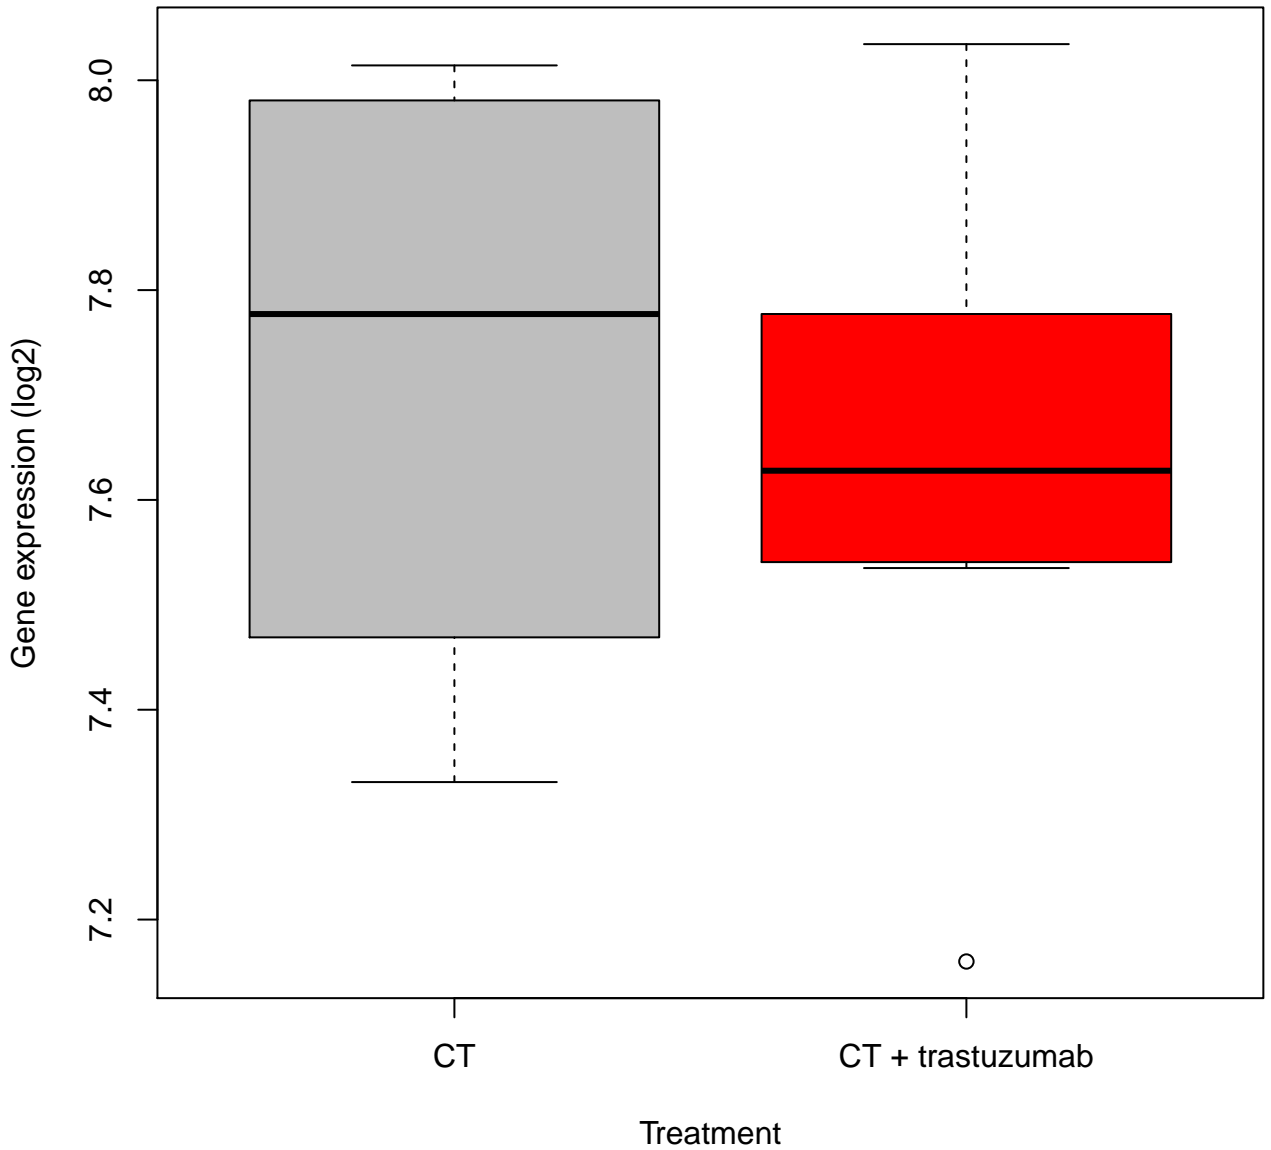

Supplement: pone.0117818.s004.pdf [file pone.0117818.s004.pdf]
